1 **Cross-disorder analysis of schizophrenia and 19 immune diseases reveals**  
2 **genetic correlation**

3 **Short Title: Genetic correlation between schizophrenia and immune diseases**

4 Jennie G Pouget<sup>1,2,3</sup>, Schizophrenia Working Group of the Psychiatric Genomics  
5 Consortium<sup>^</sup>, Buhm Han<sup>4,5,6,7</sup>, Emmanuel Mignot<sup>8</sup>, Hanna M Ollila<sup>8</sup>, Jonathan Barker<sup>9,10</sup>,  
6 Sarah Spain<sup>9,11</sup>, Nick Dand<sup>9</sup>, Richard Trembath<sup>9,12</sup>, Javier Martin<sup>13</sup>, Maureen D Mayes<sup>14</sup>,  
7 Lara Bossini-Castillo<sup>11</sup>, Elena López-Isac<sup>13</sup>, Ying Jin<sup>15,16</sup>, Stephanie A Santorico<sup>15,17,18</sup>,  
8 Richard A Spritz<sup>15,16</sup>, Soumya Raychaudhuri<sup>4,5,6,19,20,21</sup><sup>†\*</sup>, Jo Knight<sup>1,2,3,22,23</sup><sup>†\*</sup>

9 <sup>1</sup>Campbell Family Mental Health Research Institute, Centre for Addiction and Mental Health, Toronto, ON,  
10 Canada, <sup>2</sup>Institute of Medical Sciences, University of Toronto, Toronto, ON, Canada, <sup>3</sup>Department of  
11 Psychiatry, University of Toronto, Toronto, ON, Canada, <sup>4</sup>Department of Medicine, Brigham and Women's  
12 Hospital and Harvard Medical School, Boston, MA, USA, <sup>5</sup>Partners HealthCare Center for Personalized  
13 Genetic Medicine, Boston, MA, USA, <sup>6</sup>Program in Medical and Population Genetics, Broad Institute of  
14 MIT and Harvard, Cambridge, MA, USA, <sup>7</sup>Department of Convergence Medicine, University of Ulsan  
15 College of Medicine and Asan Institute for Life Sciences, Asan Medical Center, Seoul, Republic of Korea,  
16 <sup>8</sup>Center for Sleep Sciences and Medicine, Department of Psychiatry and Behavioral Sciences, Stanford  
17 University, School of Medicine, Palo Alto, CA, USA, <sup>9</sup>Division of Genetics and Molecular Medicine,  
18 Faculty of Life Sciences & Medicine, King's College London, UK, <sup>10</sup>St. John's Institute of Dermatology,  
19 Faculty of Life Sciences & Medicine, King's College London, London, UK, <sup>11</sup>Wellcome Trust Sanger  
20 Institute, Wellcome Trust Genome Campus, Hinxton, Cambridge, UK, <sup>12</sup>Queen Mary University of  
21 London, Barts and the London School of Medicine and Dentistry, London, UK, <sup>13</sup>Institute of Parasitology  
22 and Biomedicine López-Neyra, IPBLN-CSIC, Granada, Spain, <sup>14</sup>The University of Texas Health Science  
23 Center–Houston, Houston, TX, USA, <sup>15</sup>Human Medical Genetics and Genomics Program and  
24 <sup>16</sup>Department of Pediatrics, University of Colorado School of Medicine, Aurora, CO, USA, <sup>17</sup>Department of  
25 Mathematical and Statistical Sciences, University of Colorado Denver, Denver, CO, USA, <sup>18</sup>Department of  
26 Biostatistics and Informatics, Colorado School of Public Health, University of Colorado, Aurora, CO, USA,  
27 <sup>19</sup>Division of Genetics, and <sup>20</sup>Division of Rheumatology, Brigham and Women's Hospital, Harvard Medical  
28 School, Boston, MA, USA, <sup>21</sup>Faculty of Medical and Human Sciences, University of Manchester,  
29 Manchester, UK, <sup>22</sup>Biostatistics Division, Dalla Lana School of Public Health, University of Toronto, ON,  
30 Canada, <sup>23</sup>Lancaster Medical School and Data Science Institute, Lancaster University, Lancaster, UK.

31 \*Corresponding authors  
32 Email: soumya@broadinstitute.org (SR)  
33 Email: jo.knight@lancaster.ac.uk (JK)

34 <sup>†</sup>These authors contributed equally to this work

35 <sup>^</sup>Membership of the Schizophrenia Working Group of the Psychiatric Genomics Consortium is provided in  
36 the **Supporting Information**.

## 37 **Abstract**

38           Epidemiological studies have revealed that schizophrenia and immune diseases co-occur  
39 in the general population at higher than expected rates. Here, we evaluated whether the  
40 epidemiologic correlation between immune diseases and schizophrenia might be explained by  
41 shared genetic risk factors. We used data from a large genome-wide association study (GWAS)  
42 of schizophrenia (N=35,476 cases and 46,839 controls) to compare the genetic architecture of  
43 schizophrenia to 19 immune diseases. First, we evaluated the association with schizophrenia of  
44 581 variants previously reported to be associated with immune diseases at genome-wide  
45 significance. Next, we investigated genome-wide sharing of common variants using polygenic  
46 risk scores for immune diseases. We identified nine variants with potential pleiotropic effects,  
47 located in regions associated with both schizophrenia and autoimmune disease. Five of these  
48 variants were located outside of the human leukocyte antigen region, and mapped to genes with  
49 known roles in calcium signaling. Polygenic risk scores revealed significant genetic overlap with  
50 schizophrenia for narcolepsy ( $p=4.1 \times 10^{-4}$ ), primary biliary cirrhosis ( $p=1.4 \times 10^{-8}$ ), psoriasis  
51 ( $p=3.6 \times 10^{-5}$ ), systemic lupus erythematosus ( $p=2.2 \times 10^{-8}$ ), type 1 diabetes ( $p=2.0 \times 10^{-6}$ ), and  
52 ulcerative colitis ( $p=4.3 \times 10^{-4}$ ). Genetic correlation between these immune diseases and  
53 schizophrenia, estimated using cross-trait LD Score regression, ranged from 0.10 to 0.18. We  
54 also observed suggestive evidence of sex-dependent genetic correlation between schizophrenia  
55 and multiple sclerosis (interaction  $p=0.02$ ), with genetic risk scores for multiple sclerosis  
56 associated with greater risk of schizophrenia among males but not females. Our findings reveal  
57 the presence of significant genetic correlation between schizophrenia and several immune  
58 diseases, which in some cases may be sex-dependent.

## 59 **Author Summary**

60 Immune diseases occur at different rates among patients with schizophrenia compared to  
61 the general population. While the reasons for this are unclear, shared genetic risk (**genetic**  
62 **correlation**) has been proposed as a contributing factor. Prior studies have used GWAS data to  
63 estimate the genetic correlation between schizophrenia and a handful of immune diseases, with  
64 conflicting results. Here, we performed a comprehensive cross-disorder investigation of  
65 schizophrenia and 19 immune diseases. We identified nine individual genetic variants  
66 associated with both schizophrenia and immune diseases, including four variants close to genes  
67 involved in calcium signalling (*PLCL1*, *BANK1*, *EPO*, *PITPNM2*). We demonstrated significant  
68 genome-wide genetic correlation between schizophrenia and narcolepsy, primary biliary  
69 cirrhosis, psoriasis, systemic lupus erythematosus, type 1 diabetes, and ulcerative colitis.  
70 Finally, we identified a potential sex-dependent pleiotropic effect between schizophrenia and  
71 multiple sclerosis, with genetic risk scores for multiple sclerosis associated with greater risk of  
72 schizophrenia among males but not females. Our findings point to a shared genetic basis  
73 between schizophrenia and at least a subset of immune diseases. These results raise the  
74 possibility that the same genetic variants may exert their effects on neurons or immune cells to  
75 influence the development of psychiatric and immune disorders, respectively.

## 76 Introduction

77           Despite recent advances in identifying key biomarkers and genetic loci for  
78 schizophrenia, its pathophysiology remains poorly understood (1, 2). One interesting  
79 epidemiological observation is that the risk of developing an immune-mediated disease is  
80 increased among patients with schizophrenia (3–5), and vice versa (6, 7). Here, we use the  
81 term **immune disease** to broadly encompass both autoimmune and inflammatory disorders.  
82 While there are discrepancies among studies regarding which immune diseases are most  
83 strongly correlated with schizophrenia, there is converging evidence that these diseases co-  
84 occur at a greater rate than is expected by chance (3–7). A notable exception is rheumatoid  
85 arthritis (RA), where a consistent inverse association with schizophrenia has been observed (5,  
86 8).

87           Genetic factors have long been proposed as an explanation for the differing prevalence  
88 of immune diseases among patients with schizophrenia compared to the general population (5,  
89 6). The recently discovered role of *complement component 4 (C4)* variation in schizophrenia (9)  
90 provides a compelling illustration of a shared genetic mechanism in the development of immune  
91 and psychiatric disorders. Genetic variants conferring increased *C4* expression protect against  
92 developing systemic lupus erythematosus (SLE), possibly by increased tagging of apoptotic  
93 cells – which are the trigger for autoantibody development in SLE – leading to more effective  
94 clearance by macrophages (10). The same genetic mechanism increases the risk of developing  
95 schizophrenia, likely by increased tagging of neuronal synapses for elimination by microglia  
96 leading to excessive synaptic pruning (9). Similar shared genetic mechanisms may occur  
97 throughout the genome, with cellular manifestations in immune cells and neurons influencing  
98 the development of immune and psychiatric disorders, respectively. Recently, we found that  
99 susceptibility to schizophrenia does not appear to be driven by the broad set of loci harboring  
100 immune genes (11). However, not all genetic variants conferring risk of immune disease fall

101 within immune loci. Here, we evaluated whether common genetic variants influencing the risk of  
102 19 different immune diseases may also be involved in schizophrenia.

103 Our cross-disorder genetic approach is supported by recent successes in identifying  
104 shared genetic risk variants (**pleiotropy**) across a variety of human diseases (12–17). While the  
105 effect sizes identified in cross-disorder studies are often modest, they have the potential to yield  
106 significant insights into disease etiology. For instance, cross-trait genetic analyses have shed  
107 new light on cardiovascular disease and lipid biology – and shifted attention away from HDL as  
108 a potential treatment target – by demonstrating that increased HDL cholesterol levels do not  
109 reduce the risk of myocardial infarction (14). In psychiatry cross-disorder analyses have  
110 identified significant pleiotropy between schizophrenia, bipolar disorder, and major depressive  
111 disorder, indicating that these diseases are not as distinct at a pathophysiological level as  
112 current diagnostic criteria suggest (12, 13). While previous studies have investigated genetic  
113 correlation between schizophrenia and immune disorders, results have been inconsistent (**S1**  
114 **Table**). Genetic correlation has been reported between schizophrenia and Crohn’s disease (18–  
115 20), multiple sclerosis (21), rheumatoid arthritis (18, 19), systemic lupus erythematosus (19, 20),  
116 type 1 diabetes (18), and ulcerative colitis (19, 20) in some studies, but not in others (8, 13, 16,  
117 19, 22). Interestingly, negative genetic correlation (whereby genetic risk protects against  
118 developing schizophrenia) has also been reported for RA (23), in keeping with the inverse  
119 epidemiological association (5, 8). Additional studies are needed to reconcile the  
120 inconsistencies in existing cross-trait analyses of schizophrenia and immune disorders, with  
121 careful attention towards potential confounding variables (e.g. population stratification, linkage  
122 disequilibrium, non-independence of GWAS samples, and sex-specific effects). To this end we  
123 have performed a comprehensive cross-disorder analysis of schizophrenia and 19 immune  
124 diseases, using data from the largest available genetic studies.

## 125 **Results**

## 126 **Identification of immune risk variants**

127 We identified immune diseases with robust genome-wide association study (GWAS)  
128 findings using ImmunoBase (<http://www.immunobase.org>), an online resource providing curated  
129 GWAS data for immune-related human diseases. These included the following 19 diseases:  
130 alopecia areata (AA), ankylosing spondylitis (AS), autoimmune thyroid disease (ATD), celiac  
131 disease (CEL), Crohn's disease (CRO), inflammatory bowel disease (IBD), juvenile idiopathic  
132 arthritis (JIA), multiple sclerosis (MS), narcolepsy (NAR), primary biliary cirrhosis (PBC), primary  
133 sclerosing cholangitis (PSC), psoriasis (PSO), rheumatoid arthritis (RA), Sjögren's syndrome  
134 (SJO), systemic lupus erythematosus (SLE), systemic sclerosis (SSC), type 1 diabetes (T1D),  
135 ulcerative colitis (UC), and vitiligo (VIT). Notably, IBD included the union of genetic variants  
136 associated with both CRO and UC. For 14 of these immune diseases (see **Table 1**), we also  
137 obtained full GWAS or ImmunoChip summary statistics allowing us to conduct additional  
138 polygenic risk scoring (PRS) (22, 24) and cross-trait Linkage Disequilibrium Score regression  
139 (LDSC) analyses (16).

140 Given that human leukocyte antigen (HLA) alleles within the major histocompatibility  
141 complex (MHC) region (chromosome 6: 25-34 Mb) account for a significant proportion of  
142 heritability of immune diseases (25), we considered HLA and non-HLA risk variants separately  
143 in our analyses. Within the MHC region we considered only the most strongly associated HLA  
144 variant (including SNPs, imputed HLA amino acid sites, and classical alleles) for each disease  
145 based on univariate analysis in previously published studies (see **Table 2**), because conditional  
146 analyses reporting adjusted effect sizes of independent HLA variants were not available for all  
147 immune diseases. Outside of the MHC region, we considered all non-HLA variants curated in  
148 ImmunoBase for each of the 19 immune diseases.

149 The number of genome-wide significant non-HLA risk loci for each of the 19 immune  
150 diseases varied from three (NAR) to 144 (IBD). Several variants were associated with more  
151 than one immune disease. In total we identified 581 unique variants (563 non-HLA variants and

152 18 HLA variants) associated with any immune disease at genome-wide significance. We refer to  
153 these variants as **immune risk variants**.

154

### 155 **Genome-wide significant immune disease loci are associated with schizophrenia**

156 To evaluate the association of immune risk variants with schizophrenia, we used  
157 previously published findings from a GWAS conducted by the Schizophrenia Working Group of  
158 the Psychiatric Genomics Consortium (1, 11). This GWAS represented a meta-analysis of 52  
159 cohorts, comprising a total of 35,476 cases and 46,839 controls, and the full dataset is referred  
160 to here as the SCZ-52 study. We considered SNPs associated with schizophrenia at  $p < 8.6 \times 10^{-5}$   
161 (Bonferroni correction for 581 tests, 563 non-HLA and 18 HLA variants) to have pleiotropic  
162 effects. Given the size of the schizophrenia GWAS, we had over 80% power to detect  
163 pleiotropic SNPs assuming an  $OR \geq 1.12$  in schizophrenia. Five immune risk variants showed  
164 potential pleiotropic effects, with the risk allele for immune disease also conferring risk for  
165 schizophrenia (**Table 3**). These variants have been previously implicated in CRO (rs6738825,  
166 rs13126505, rs1734907 (26, 27)), MS (rs7132277 (28)), and CEL (rs296547 (29)). To evaluate  
167 the pleiotropic potential of these variants, we compared the genetic architecture of the region  
168 using regional plots (**S1 Fig**). In particular, the association signals for rs13126505 looked very  
169 similar in schizophrenia and CRO.

170 Next, we evaluated whether there was any evidence of overall risk allele sharing  
171 between each of the 19 immune diseases and schizophrenia using a binomial sign test. Overall,  
172 the direction of effect for the sets of non-HLA SNPs associated with each of the 19 immune  
173 diseases at genome-wide significance was not shared with schizophrenia more than expected  
174 by chance (all binomial sign test  $p > 0.05$ , **S2 Fig**). Thus, we did not observe evidence of risk  
175 allele sharing between any immune disease and schizophrenia when using a stringent genome-  
176 wide significance threshold to define immune risk variants. We also evaluated the collective  
177 association of 429 LD-independent, non-HLA immune risk variants associated with at least one



178 of the 19 immune-mediated diseases. We found significant deviation from the theoretical null in  
179 schizophrenia for immune risk SNPs ( $\lambda=1.53$ ). However, when we compared the association of  
180 immune risk SNPs to that of similar SNP sets (**Supplementary Methods**) we observed no  
181 evidence of enrichment (**S3 Fig**,  $p=0.66$ ), indicating that immune risk SNPs were not associated  
182 with schizophrenia more than expected by chance given the polygenic nature of schizophrenia.

183 Finally, we evaluated the association of the top HLA variant implicated in each of the 19  
184 immune diseases with schizophrenia. Notably, the association results for HLA variants were  
185 obtained using a refined subset of 31 cohorts from the SCZ-52 study with high-quality coverage  
186 of the MHC region (20,253 cases and 25,011 controls), as previously described (11). Overall,  
187 the effect sizes of these HLA variants were substantially greater for immune diseases (median  
188 OR = 2.92, minimum OR = 1.49 for UC, maximum OR = 251 for NAR) than schizophrenia  
189 (median OR = 1.06, minimum OR = 1.01, maximum OR = 1.19). We observed four HLA risk  
190 alleles associated with both immune disease and schizophrenia, particularly in the class II HLA  
191 region (**Table 2, Fig 1**). The four HLA variants showing potential pleiotropic effects in  
192 schizophrenia were the strongest HLA risk variants for alopecia (HLA-DRB1 #37 Asn), CEL  
193 (HLA-DQB1 #74 Ala), PSC (HLA-B\*08:01), and SJO (HLA-DQB1\*02:01). There was very low  
194 LD between these four HLA variants and rs1233578, the strongest associated variant in the  
195 region in schizophrenia ( $r^2=0.04 - 0.20$ , **Table 2**). The presence of HLA-DRB1 #37 Asn  
196 conferred a protective association in both alopecia and schizophrenia, but the remaining HLA  
197 variants showed the opposite direction of effect in schizophrenia compared to immune disease  
198 (**Table 2, Fig 1**).

199

## 200 **Polygenic risk for six immune diseases is associated with schizophrenia**

201 Our immune risk variant set captured only those variants associated with immune  
202 diseases at genome-wide significance in current GWASs. Given their polygenicity, there are



203 100s to 1,000s of additional variants associated with each immune disease which have not yet  
204 been identified (31). To evaluate sharing of risk alleles between immune diseases and  
205 schizophrenia using a broader set of variants, we used PRS (22, 24) and LDSC (16).

206 For each of the 14 immune diseases with available genome-wide summary statistics, we  
207 constructed genetic risk scores (GRSs) at a range of p-value thresholds ( $p_T$ ) as in previous  
208 studies (12) and tested for the association of these GRSs with schizophrenia in a refined subset  
209 of the SCZ-52 study (17,000 cases and 20,655 controls) which excluded samples shared with  
210 the immune disease GWASs. To benchmark our findings in immune diseases, we also analyzed  
211 human height (32) and included previously published PRS results for bipolar disorder (12). We  
212 considered immune diseases with PRS  $p < 0.002$  at any  $p_T$  to show significant genetic overlap  
213 with schizophrenia (Bonferroni correction for 14 immune diseases tested in both sexes,  
214  $0.05/(14 \times 2) = 0.002$ ). Importantly, commonly used goodness-of-fit estimates obtained from PRS  
215 (such as  $\beta_{GRS}$  and Nagelkerke's pseudo- $R^2$ ) lack meaningful interpretation and cannot be  
216 compared across studies (33). For these reasons we used  $\beta_{GRS}$  to interpret the direction of  
217 effect (i.e. positive or negative correlation), but not to interpret or compare the degree of genetic  
218 sharing between immune diseases and schizophrenia. For further details of our PRS approach,  
219 see **Materials and Methods**.

220 Using PRS, we had over 80% power to detect genetic covariance with schizophrenia  
221 ranging from 0.02-0.03 for most of the immune diseases, although some showed less than 80%  
222 power in this range (PSO, SLE, VIT; **S4 Fig**).

223 As previously described, bipolar disorder PRSs were significantly associated with  
224 schizophrenia ( $p < 1 \times 10^{-50}$  at  $p_T < 1$ ) (12). Surprisingly, human height PRSs were also significantly  
225 associated with schizophrenia ( $p = 1 \times 10^{-11}$  at  $p_T < 1$ , **S2 Table**). Height was analyzed as a  
226 negative control based on its previously reported lack of genetic correlation with schizophrenia  
227 using LDSC (16). Using PRS, we observed that genetic liability for increased height protected

228 against schizophrenia ( $\beta_{\text{GRS}}=-0.11$  at  $p_{\text{T}}<1$ ). The significant inverse association of height PRSs  
229 with schizophrenia case-status we observed may reflect the greater sensitivity of this approach  
230 to subtle population stratification, sample sharing, and/or true genetic overlap.

231 Genetic scores including the HLA region were significant for CEL, NAR, PBC, PSO, RA,  
232 SLE, SSC, T1D, and UC ( $p<0.002$  at multiple  $p_{\text{T}}$ , **S3 Table**). Height was not included in these  
233 analyses, given that HLA variants have not been previously reported in GWAS of this phenotype  
234 (32). With the exception of CEL ( $\beta_{\text{GRS}}\approx-0.04$  at  $p_{\text{T}}<5\times 10^{-8}$ ,  $1\times 10^{-4}$ , and  $1\times 10^{-3}$ ), all immune  
235 diseases exhibited a positive association with schizophrenia case-status (all  $\beta_{\text{GRS}}>0$ , **S3 Table**).  
236 For CEL, RA, SLE, and SSC only those PRSs constructed using the most stringent p-value  
237 cutoffs ( $5\times 10^{-8}$ ,  $1\times 10^{-4}$ ,  $1\times 10^{-3}$ ) were significantly associated with schizophrenia. To evaluate  
238 whether the HLA region alone was driving the observed genetic sharing, we constructed PRSs  
239 excluding this region. After excluding HLA variants, genetic scores for NAR, PBC, PSO, SLE,  
240 T1D, and UC remained significantly associated with schizophrenia (**S5 Fig, S2 Table**). Because  
241 the genetic overlap between these six immune diseases and schizophrenia was not driven by a  
242 single HLA variant of large effect, we focused on these findings for the remainder of our  
243 analyses.

244 Given the potential sensitivity of PRS to artificial genetic overlap highlighted in our  
245 analysis of height, we wanted to assess whether cryptic sample sharing between the immune  
246 and schizophrenia GWASs could be driving the shared genetic liability that we observed. To do  
247 this, we conducted leave-half-out analyses. If the observed genetic overlap was driven by  
248 samples shared between certain schizophrenia cohorts and the immune disease GWASs, the  
249 PRS association should not be consistently observed across subsamples leaving out half of the  
250 schizophrenia cohorts. Across 1,000 subsamples ( $N_{\text{cases}}$  ranging from 3,985-13,074) leaving out  
251 a randomly selected 14 cohorts, we observed a high proportion of subsamples with PRSs  
252 significantly associated with schizophrenia ( $p<0.05$  at  $p_{\text{T}}<1$ ) for height (0.99), NAR (0.72), PBC

253 (0.95), PSO (0.84), SLE (0.97), T1D (0.95), and UC (0.70) suggesting our findings were not  
254 driven by sample sharing.

255 To further validate our PRS results we applied LDSC, an independent method for  
256 estimating genome-wide genetic correlation between traits that is robust to sample sharing (16),  
257 using summary statistics from the 49 European-ancestry cohorts in the SCZ-52 study (31,335  
258 cases and 38,765 controls) (1). Unlike PRS, LDSC provides an interpretable and comparable  
259 estimation of genetic sharing between two traits in the form of genetic correlation ( $r_g$ ) values.  
260 Notably, LDSC is less sensitive than PRS and is not robust when applied to genetic data  
261 obtained from specialty chips (e.g. ImmunoChip) (16). Given that this was a secondary analysis,  
262 we considered immune diseases with  $r_g$   $p < 0.05$  to show significant genetic overlap with  
263 schizophrenia.

264 As expected, our positive control (bipolar disorder) showed significant genetic overlap  
265 with schizophrenia ( $r_g = 0.75 \pm 0.05$ ,  $p = 8.5 \times 10^{-60}$ ; **Fig 2, S4 Table**). In contrast to our PRS results,  
266 but in agreement with previous findings (16), our negative control (height) showed no such  
267 overlap using LDSC ( $r_g = -0.004 \pm 0.02$ ,  $p = 0.84$ ; **Fig 2, S4 Table**). With respect to immune  
268 diseases, LDSC confirmed significant genetic overlap with schizophrenia for PBC, PSO, SLE,  
269 and UC ( $r_g = 0.10$ - $0.18$ , **Fig 2, S4 Table**) indicating the association of PRSs for these diseases  
270 was not driven by shared samples. Notably, genetic correlations for PSO and SLE did not  
271 survive correction for the 14 tests performed (**S4 Table**). We also observed significant genetic  
272 overlap with schizophrenia for NAR and T1D using LDSC, with the caveat that these datasets  
273 were genotyped using ImmunoChip and did not survive multiple testing correction (**Fig 2, S4**  
274 **Table**). Overall, LDSC provided consistent results for the six immune diseases showing  
275 significant genetic sharing with schizophrenia by PRS. Interestingly, both CRO and IBD showed  
276 significant genetic correlation with schizophrenia using LDSC ( $r_g = 0.10$  and  $0.12$  for CRO and  
277 IBD, respectively; **Fig 2, S4 Table**), while PRS for these diseases were not significant (**S2**

278 **Table**). The genetic correlations observed between immune diseases and schizophrenia were  
279 moderate, with  $r_g$  values about a fifth of that previously reported for bipolar disorder, and a  
280 quarter of that for major depressive disorder (16).

281

## 282 **Exploration of sex-dependent genetic correlation between schizophrenia and immune** 283 **diseases**

284 Given the significant sex bias of autoimmune diseases, with women at greater risk  
285 overall (34), we hypothesized that there may be sex-dependent genetic overlap between  
286 schizophrenia and some immune-mediated diseases. We therefore performed sex-stratified  
287 PRS, testing the association of height and immune disease GRSs with schizophrenia separately  
288 in males and females of the SCZ-52 study. Genetic scores for height showed significant  
289 association with schizophrenia in both males and females. Three of the immune diseases (PBC,  
290 PSO, T1D) with significant main effects showed sex-dependent effects, with greater signal  
291 among males (**S5 Table**). Additionally, although genetic scores for MS were not significantly  
292 associated with schizophrenia in the total sample there was significant association among  
293 males ( $R^2=0.03$ ,  $p=1.26 \times 10^{-3}$  at  $p_T < 1$ ; **S5 Table**).

294 Given the greater statistical power for the male subset of the schizophrenia GWAS, we  
295 performed simulations by selecting random subsamples of male cases and controls equal in  
296 size to the female sample (5,321 cases and 9,094 controls). If the stronger genetic overlap  
297 between schizophrenia and MS, PBC, PSO, and T1D among males was driven by the larger  
298 sample size rather than a true sex-dependent effect, there should be no consistent association  
299 of PRSs with schizophrenia in these subsamples. Across 1,000 subsamples, the proportion with  
300 significant PRS ( $p < 0.002$  at  $p_T < 1$ ) was high for PBC (0.94) and T1D (0.87), suggesting our  
301 finding of a greater pleiotropic effect among males for these diseases was not driven solely by  
302 lower statistical power among females; this was not the case for PSO (0.59) or MS (0.21).

303           Next, we performed formal statistical tests for an interaction between sex and genetic  
304 scores for these four immune diseases. We observed a nominally significant interaction for MS  
305 ( $p < 0.05$  at several  $p_T$ ; **S5 Table**), noting that this finding did not survive correction for multiple  
306 testing. The remaining immune diseases did not show significant sex interactions, although the  
307 direction of effect was consistent with a greater pleiotropic effect in males (**S5 Table**).

308

## 309 **Discussion**

310           Using a variety of statistical approaches, we provide evidence of shared genetic risk for  
311 schizophrenia and several immune diseases. Outside of the MHC region, we identified five  
312 SNPs with potential pleiotropic effects - influencing risk for both immune disease and  
313 schizophrenia. Interestingly, nearby genes for four of the pleiotropic variants have been  
314 implicated in calcium signaling, suggesting this may be a shared risk pathway (12, 35). Parallel  
315 to its role in synaptic transmission, calcium signaling plays an important role in lymphocyte  
316 activation (36). However, we note that two of the pleiotropic variants are reportedly eQTLs for  
317 more distant genes not necessarily involved in calcium signaling, and further work is required to  
318 confirm their biological function.

319           Within the HLA region, we identified four potentially pleiotropic variants. An important  
320 caveat is that these four variants were not the top SNPs in their respective regions of  
321 association with schizophrenia, and were not primary drivers of the MHC association in  
322 schizophrenia in stepwise conditional analyses (9). Therefore, the biological significance of  
323 these particular HLA variants in schizophrenia is likely limited.

324           Using PRS we observed shared genetic liability with schizophrenia for six immune  
325 diseases (NAR, PBC, PSO, SLE, T1D, and UC), all of which have been previously reported to  
326 co-occur with schizophrenia (3, 5, 37). Thus, currently available genetic data suggest that  
327 shared genetic risk may contribute to the co-occurrence of these immune diseases in

328 schizophrenia - particularly PBC, PSO, SLE, and UC, which also showed robust genetic  
329 correlation with schizophrenia using LDSC. The magnitude of genetic correlations ( $r_g$  values)  
330 observed between these immune diseases and schizophrenia was about a fifth of that  
331 previously reported for bipolar disorder, and a quarter of that for major depressive disorder (16).  
332 Possible explanations for this sharing of genetic risk include the presence of a hidden subgroup  
333 of “autoimmune-like” schizophrenia cases and/or sharing of specific biological pathways  
334 between schizophrenia and these particular immune diseases.

335         To our knowledge, this is the first time that sex-dependent genetic correlation with  
336 immune diseases has been investigated in schizophrenia. We found nominal evidence of male-  
337 specific genetic correlation for MS, and a stronger pleiotropic effect among males for PBC,  
338 PSO, and T1D although the latter were not statistically significant. Interestingly, animal studies  
339 indicate that sex hormones have opposing effects on predisposition to schizophrenia and  
340 autoimmunity; estrogen has been reported to protect against the development of schizophrenia  
341 (38), while androgens appear to protect against the development autoimmune diseases (39,  
342 40). We emphasize that our sex-dependent findings require validation in independent samples.  
343 If replicated, one possibility is that sex hormones modulate pathogenesis among genetically  
344 vulnerable individuals, making males more likely to develop schizophrenia and females more  
345 likely to develop autoimmune diseases.

346         Our work was subject to several important limitations. First, PRSs for human height –  
347 analyzed as a negative control – showed stronger association with schizophrenia than any of  
348 the immune diseases. An inverse epidemiological relationship between height and  
349 schizophrenia has been reported (41, 42), consistent with our PRS findings. The reasons for the  
350 discrepancy between PRS and LDSC, which showed no genetic correlation between height and  
351 schizophrenia (as previously reported (16)) are unclear. One possibility is that PRS, which uses  
352 individual-level genotype data as opposed to summary statistics, is a more sensitive method to  
353 detect genome-wide sharing of risk alleles. If this is the case, it raises a broader question

354 regarding how much genetic overlap is expected across complex traits in general using the PRS  
355 approach. An alternative explanation that must be considered is that PRS may be more  
356 vulnerable to confounding by cryptic population stratification or sample sharing. Second,  
357 genome-wide summary statistics were not available for all of the immune diseases, resulting in  
358 a more limited analysis of 14 diseases. Furthermore, for five of these diseases (CEL, JIA, MS,  
359 NAR, T1D) summary statistics were obtained from Immunochip rather than GWAS, providing  
360 incomplete coverage of the genome for comparison with schizophrenia and biasing the genetic  
361 correlation estimates obtained by LDSC.

362         Despite these limitations, our work adds to a growing body of evidence suggesting that  
363 schizophrenia and immune diseases share genetic risk factors. There are conflicting reports in  
364 the literature with respect to the specific immune diseases demonstrating genetic overlap with  
365 schizophrenia, and the direction of effect (positive or negative genetic correlation). Genetic  
366 overlap with schizophrenia has been previously investigated for nine of the immune diseases  
367 studied here. Genome-wide genetic correlation with schizophrenia has been previously reported  
368 for CRO (18–20), MS (21), PBC (20), PSO (20), RA (both positive (18, 19) and negative (23)  
369 genetic correlations), SLE (19, 20), T1D (18), and UC (19, 20) (see **S1 Table** for a summary of  
370 previous studies). Our results are consistent with previously reported genetic overlap between  
371 schizophrenia and PBC (20), PSO (20), SLE (19, 20), T1D (18), and UC (19, 20). While we did  
372 not observe genetic correlation between schizophrenia and MS in the total sample, there was a  
373 significant sex-dependent effect with genetic correlation observed among males. We provide  
374 new evidence of genetic correlation with NAR (not previously investigated). Notably, we did not  
375 find any significant genetic correlation between schizophrenia and RA. Despite the robust  
376 inverse epidemiological association between schizophrenia and RA (8), the genetic association  
377 is less consistent. Using methods based on summary statistics (including PRS and LDSC), four  
378 previous studies reported no evidence of pleiotropy between schizophrenia and RA (8, 16, 20,  
379 22), while two studies reported positive genetic correlation (18, 19). Notably, Lee *et al.* reported



380 an inverse genetic correlation – in keeping with the observed epidemiological effect – using  
381 restricted maximum likelihood (GREML), a method utilizing full genotype data which has greater  
382 statistical power to detect small pleiotropic effects than PRS or LDSC (23). Given the modest  
383 and potentially sex-dependent genetic correlations observed in the present study, subtle  
384 differences in statistical power across studies using different statistical methods and GWAS  
385 datasets may explain these discrepant findings. As genetic samples continue to grow, and our  
386 understanding of the degree of genetic overlap expected among complex traits evolves, it will  
387 be worthwhile to revisit these analyses.

388 Overall, our analyses provide statistical evidence that common genetic variants  
389 influencing the risk of immune diseases – in particular NAR, PBC, PSO, SLE, T1D, and UC –  
390 are also involved in schizophrenia. Studies identifying the cell types and biological pathways  
391 that may be driving this genetic overlap are underway, and will hopefully provide further insights  
392 into the pathophysiology of schizophrenia. In the meantime, our work provides further support  
393 for ongoing functional studies investigating parallel pathogenic mechanisms between the  
394 immune and the central nervous systems.

395

## 396 **Materials and Methods**

### 397 **Samples and quality control**

398 We used either imputed genotype data or summary statistics generated as described in  
399 the original GWASs. For sample details, see **Table 1**.

400

### 401 **Schizophrenia dataset**

402 We used data from the SCZ-52 study (1). For analyses of non-HLA genome-wide  
403 significant risk variants for immune diseases we used publicly available summary statistics from  
404 the total dataset (52 cohorts; 35,476 cases and 46,839 controls) (1). For PRS analyses we used

405 all 36 European ancestry case-control cohorts with available individual-level genotype data  
406 (25,629 cases and 30,976 controls). For analyses including HLA variants we used a further  
407 refined 31 European ancestry case-control cohorts (20,253 cases and 25,011 controls) with  
408 high-quality coverage of the MHC region, as previously described (11).

409

## 410 **Immune disease datasets**

411 To estimate the extent of genetic overlap between schizophrenia and immune diseases,  
412 we obtained full GWAS or ImmunoChip summary statistics for 14 of the 19 immune diseases  
413 (five immune diseases were not included in PRS analyses due to lack of available summary  
414 statistics). We obtained publicly available summary statistics for ten immune diseases (see  
415 URLs): CEL (43), CRO (44), IBD (44), JIA (45), MS (28), NAR (46), RA (47), SLE (48), T1D  
416 (49), and UC (44). For the following four immune diseases, we obtained summary statistics with  
417 permission from the authors: PBC (50), PSO (51), SSC (52), and VIT (53).

418

## 419 **Testing the association of genome-wide significant risk alleles for 19 immune** 420 **diseases in schizophrenia**

421 For each of the 19 immune diseases, we defined risk loci outside of the MHC region  
422 (chromosome 6: 25-34 Mb) using curated GWAS results from ImmunoBase (for details, see  
423 **Supplementary Methods**). Notably, we included the union of risk loci for CRO and UC as IBD  
424 loci. Within the MHC region we considered only the most strongly associated HLA variant  
425 (including SNPs, imputed HLA amino acid sites, and classical alleles) for each disease based  
426 on univariate analysis in previously published studies (see **Table 2**), because conditional  
427 analyses reporting adjusted effect sizes of independent HLA variants were not available for all  
428 immune diseases. In total there were 581 unique variants (563 non-HLA variants and 18 HLA  
429 variants) associated with any immune disease at genome-wide significance.

430 We evaluated the association of these 581 variants with schizophrenia using previously  
431 published association results for non-HLA (1) and HLA variants (11). We considered SNPs  
432 associated with schizophrenia at  $p < 8.6 \times 10^{-5}$  (Bonferroni correction for 581 tests, 563 non-HLA  
433 and 18 HLA variants) to have pleiotropic effects.

434 We tested for shared direction of effect with schizophrenia among SNPs associated with  
435 each of the 19 immune diseases using the binomial sign test. Because some immune risk SNPs  
436 were associated with multiple diseases with inconsistent direction of effect, we could not  
437 evaluate shared direction of effect among the collective set of immune risk SNPs in  
438 schizophrenia.

439 To evaluate the collective association of SNPs associated with any immune disease, we  
440 evaluated the p-values of a pruned set of 429 LD-independent, non-HLA immune risk SNPs in  
441 the schizophrenia dataset. We quantified enrichment of immune risk SNP associations in  
442 schizophrenia using the genomic inflation value  $\lambda$ . We obtained an empirical enrichment p-value  
443 by comparing this to  $\lambda$  values from 1,000 equal-sized sets of SNPs drawn from the  
444 schizophrenia GWAS summary data, and matched to the immune SNP set for minor allele  
445 frequency (MAF) and linkage disequilibrium (LD) score as these parameters are correlated with  
446 GWAS test statistics (see **Supplementary Methods** for details).

447

#### 448 **Testing the association of polygenic risk scores for 14 immune diseases in** 449 **schizophrenia**

450 To evaluate whether common variants influencing risk of immune diseases collectively  
451 contribute to schizophrenia, we used PRS (22, 24). To benchmark the amount of genetic  
452 overlap between schizophrenia and immune disease, we included previously published results  
453 for bipolar disorder as a positive control (12). We used human height (32) as a negative control  
454 because – despite the inverse epidemiological relationship between height and schizophrenia

455 previously reported (41, 42) – a prior study using cross-trait LDSC reported no genetic  
456 correlation with schizophrenia (16).

457 For 14 immune diseases with available genome-wide summary statistics we performed  
458 PRS at a range of p-value thresholds ( $p_T$ ) as in previous studies (12):  $5 \times 10^{-8}$ ,  $1 \times 10^{-4}$ ,  $1 \times 10^{-3}$ ,  
459 0.01, 0.05, 0.1, 0.2, 0.3, 0.4, 0.5, and 1.0 (which included all LD-independent SNPs, **Table 1**).  
460 Due to extensive LD in the HLA region, we performed analyses both including the top HLA  
461 variant and excluding the HLA region. At each  $p_T$ , we constructed PRSs for each individual  $i$  in  
462 the schizophrenia cohort for each immune disease  $h$  by calculating the sum of risk-allele  
463 dosages ( $g$ ) weighted by their effect sizes ( $\beta$ ) for that immune disease:

$$PRS_{i,h} = \sum_M \beta_{M,h} g_{M,i}$$

464 where  $M$  iterates over all known risk alleles for disease  $h$ ,  $\beta_{M,h}$  is the effect size (log odds ratio)  
465 of  $M$  in disease  $h$ , and  $g_{M,i}$  is the risk-allele dosage of  $M$  in individual  $i$ . We then performed  
466 logistic regression in R (54) using the stats package (54) to evaluate the association between  
467 schizophrenia case-status and PRSs for each immune disease. As in previous studies,  
468 statistical significance of the PRSs was estimated based on their logistic regression coefficient  
469 (12, 22). Variance in schizophrenia case-status explained by the PRSs was estimated using the  
470 deviation in liability-scale  $R^2$  between a null model (including 10 ancestry-informative principal  
471 components and study site) and the full model (including PRSs in addition to these covariates),  
472 calculated as previously described (33) assuming a population prevalence of schizophrenia of  
473 1%. We also estimated Nagelkerke's pseudo- $R^2$  using the fmsb package (55). We considered  
474 immune diseases with PRS  $p < 0.002$  at any  $p_T$  to show significant genetic overlap with  
475 schizophrenia (Bonferroni correction for 14 immune diseases tested in both sexes,  
476  $0.05/(14 \times 2) = 0.002$ ). As in previous studies (12, 22) we did not use Bonferroni correction for the  
477 number of p-value thresholds, as these tests are highly correlated.

478 We excluded eight schizophrenia cohorts using Wellcome Trust Case Control Consortium  
479 (WTCCC) controls, due to the use of these samples in the immune disease GWASs. The total  
480 schizophrenia sample analyzed by PRS included 37,655 subjects (28 cohorts; 17,000 cases  
481 and 20,655 controls). Sex-stratified and formal sex-PRS interaction analyses were performed  
482 among the subset of subjects with known sex (9,787 male cases and 9,284 male controls; 5,231  
483 female cases and 9,094 female controls). For details of PRS, see **Supplementary Methods**  
484 and **Table 1**.

485

## 486 **Estimating the degree of genetic correlation between schizophrenia and 14** 487 **immune diseases**

488 To validate our PRS results and obtain genetic correlation ( $r_g$ ) estimates, we performed a  
489 secondary analysis using cross-trait LDSC (16). This method estimates the genetic correlation  
490 between two traits using GWAS summary statistics. The method is computationally fast, and  
491 genetic correlation results are consistent with those obtained using individual-level data (16).  
492 The statistical framework has been described in detail previously (16). Briefly, LDSC leverages  
493 the relationship between LD and association test statistics to estimate heritability as the slope of  
494 the regression of z-scores against LD scores (56). Cross-trait LDSC is a bivariate extension of  
495 this method which estimates genetic covariance as the slope of the regression of the products  
496 of z-scores against LD scores using the following equation (16):

$$E[z_{1j}z_{2j}|\ell_j] = \frac{\sqrt{N_1N_2}\rho_g}{M} \ell_j + \frac{\rho N_s}{\sqrt{N_1N_2}}$$

497 where  $z_{ij}$  denotes the z score for study  $i$  and SNP  $j$ ,  $\ell_j$  is the LD score (56),  $N_i$  is the sample size  
498 for study  $i$ ,  $\rho_g$  is the genetic covariance,  $M$  is the number of SNPs in the reference panel with  
499 MAF between 5% and 50%,  $N_s$  is the number of individuals included in both studies, and  $\rho$  is  
500 the phenotypic correlation among the  $N_s$  overlapping samples. Genetic covariance  $\rho_g$  is

501 estimated by regressing  $z_{1j}z_{2j}$  against  $\ell_j\sqrt{N_1N_2}$ , and multiplying the resulting slope by  $M$ .  
502 Statistical significance is assessed using block jackknifing over 200 equally sized blocks of  
503 SNPs (16). Importantly, the MHC region is excluded from LDSC analyses due to its unusual LD  
504 structure and genetic architecture (57).

505 Because LDSC is robust to sample sharing across GWAS (16), we used summary  
506 statistics from the 49 European-ancestry cohorts in the SCZ-52 study (31,335 cases and 38,765  
507 controls) (1). Similar to the PRS analyses described above, we benchmarked the genetic  
508 correlations observed for immune diseases by including bipolar disorder as a positive control  
509 (58) and human height (32) as a negative control. We used LD Scores from the “eur\_w\_ld\_chr/”  
510 files available from <https://data.broadinstitute.org/alkesgroup/LDSCORE>, computed using 1000  
511 Genomes Project (59) Europeans as a reference panel as previously described (57). To ensure  
512 we were using well-imputed SNPs we filtered all GWAS as previously described (16), including  
513 limiting the analysis to HapMap 3 (60) SNPs as implemented in the LDSC script  
514 `munge_sumstats.py` (<https://github.com/bulik/ldsc>). Given that this was a secondary analysis,  
515 we considered traits with  $r_g p < 0.05$  to have significant genetic correlation with schizophrenia.

516

## 517 **Statistical power**

518 Power to detect association of individual non-HLA and HLA immune risk variants in  
519 schizophrenia was calculated using the Genetic Power Calculator (61) assuming a risk allele  
520 frequency (RAF) of 0.05, disease prevalence of 1%, and significance threshold ( $\alpha$ ) of  $8.6 \times 10^{-5}$ .  
521 Power for PRS was evaluated using AVENGEME (62, 63), assuming disease and genetic  
522 parameters detailed in **S6 Table**.

## 523 URLs

524 LD Score database:

525 [ftp://atguftp.mgh.harvard.edu/brendan/1k\\_eur\\_r2\\_hm3snps\\_se\\_weights.RDS](ftp://atguftp.mgh.harvard.edu/brendan/1k_eur_r2_hm3snps_se_weights.RDS)

526

527 GWAS summary statistics:

528 • CEL

529 [https://www.immunobase.org/downloads/protected\\_data/iChip\\_Data/hg19\\_gwas\\_ic\\_cel\\_tr](https://www.immunobase.org/downloads/protected_data/iChip_Data/hg19_gwas_ic_cel_tr)

530 [ynka\\_4\\_19\\_1.tab.gz](#)

531 • CRO, IBD, UC

532 <ftp://ftp.sanger.ac.uk/pub/consortia/ibdgenetics/iibdgc-trans-ancestry-filtered-summary->

533 [stats.tgz](#)

534 • JIA

535 [https://www.immunobase.org/downloads/protected\\_data/iChip\\_Data/hg19\\_gwas\\_ic\\_jia\\_hin](https://www.immunobase.org/downloads/protected_data/iChip_Data/hg19_gwas_ic_jia_hin)

536 [ks\\_UK\\_4\\_19\\_1.tab.gz](#)

537 • MS

538 [https://www.immunobase.org/downloads/protected\\_data/GWAS\\_Data/hg19\\_gwas\\_ms\\_im](https://www.immunobase.org/downloads/protected_data/GWAS_Data/hg19_gwas_ms_im)

539 [sgc\\_4\\_19\\_1.tab.gz](#)

540 • NAR

541 [https://www.immunobase.org/downloads/protected\\_data/iChip\\_Data/hg19\\_gwas\\_ic\\_nar\\_fa](https://www.immunobase.org/downloads/protected_data/iChip_Data/hg19_gwas_ic_nar_fa)

542 [raco\\_4\\_19\\_1.tab.gz](#)

543 • RA

544 [http://www.broadinstitute.org/ftp/pub/rheumatoid\\_arthritis/Stahl\\_etal\\_2010NG/](http://www.broadinstitute.org/ftp/pub/rheumatoid_arthritis/Stahl_etal_2010NG/)

545 • SLE

546 [https://www.immunobase.org/downloads/protected\\_data/GWAS\\_Data/hg19\\_gwas\\_sle\\_be](https://www.immunobase.org/downloads/protected_data/GWAS_Data/hg19_gwas_sle_be)

547 [ntham\\_4\\_20\\_0.tab.gz](#)



- 548 • T1D
- 549 [https://www.immunobase.org/downloads/protected\\_data/iChip\\_Data/hg19\\_gwas\\_ic\\_t1d\\_o](https://www.immunobase.org/downloads/protected_data/iChip_Data/hg19_gwas_ic_t1d_o)
- 550 [nengut\\_meta\\_4\\_19\\_1.tab.gz](#)

## 551 Acknowledgements

552 We thank all study participants, and all research staff at the numerous study sites that  
553 made this research possible. Computations were performed on the Genetic Cluster Computer  
554 (GCC) hosted by SURFsara ([www.surfsara.nl](http://www.surfsara.nl)). We thank ImmunoBase for curating genetic risk  
555 factors for the immune diseases investigated. We thank the Canadian-US PBC Consortium, the  
556 Italian PBC Genetics Study Group and the UK-PBC Consortium for sharing their summary data  
557 for the PBC GWAS. We thank the International Inflammatory Bowel Disease Genetics  
558 Consortium (IIBDGC) for providing publicly available genome-wide summary statistics for CRO,  
559 UC, and IBD. We also thank the International Multiple Sclerosis Genetics Consortium (IMSGC)  
560 and the investigators leading the GWASs for CEL, JIA, RA, SLE, and T1D for providing  
561 genome-wide summary statistics from their studies on ImmunoBase.

562 This research was supported in part by a number of funding sources. This research uses  
563 resources provided by the Genetic Association Information Network (GAIN), obtained from the  
564 database of Genotypes and Phenotypes (dbGaP) found at <http://www.ncbi.nlm.nih.gov/gap>  
565 through dbGaP accession number phs000021.v3.p2; samples and associated phenotype data  
566 for this study were provided by the Molecular Genetics of Schizophrenia Collaboration (PI:  
567 Pablo V. Gejman, Evanston Northwestern Healthcare (ENH) and Northwestern University,  
568 Evanston, IL, USA). JG Pouget is supported by Fulbright Canada, the Weston Foundation, and  
569 Brain Canada through the Canada Brain Research Fund - a public-private partnership  
570 established by the Government of Canada. B Han is supported by the Asan Institute for Life  
571 Sciences, Asan Medical Center, Seoul, Republic of Korea (grant 2016-0717) and the Korean  
572 Health Technology R&D Project, Ministry of Health and Welfare, Republic of Korea (grant  
573 HI14C1731). HM Ollila is supported by the Finnish Cultural Foundation. J Martin is supported by  
574 grants SAF2015-66761-P from the Spanish Ministry of Economy and Competitiveness and P12-  
575 BIO-1395 from from Consejería de Innovación, Ciencia y Tecnología, Junta de Andalucía

576 (Spain). Y Jin, SA Santorico, and R Spritz are supported by the U.S. National Institutes of  
577 Health (NIH) grants R01AR045584, R01AR056292, X01HG007484, and P30AR057212 and by  
578 institutional research funding IUT20-46 from the Estonian Ministry of Education and Research.  
579 MD Mayes is supported by the U.S. NIH grants N01AR02251 and R01AR05528. S  
580 Raychaudhuri is supported by the U.S. NIH grants 1R01AR063759, 1R01AR062886,  
581 1UH2AR067677-01, and U19AI111224-01 and Doris Duke Charitable Foundation grant  
582 2013097. J Knight is the Joanne Murphy Professor in Behavioural Science. Funding for the  
583 GAIN schizophrenia sample was provided by the U.S. NIH grants R01 MH67257, R01  
584 MH59588, R01 MH59571, R01 MH59565, R01 MH59587, R01 MH60870, R01 MH59566, R01  
585 MH59586, R01 MH61675, R01 MH60879, R01 MH81800, U01 MH46276, U01 MH46289 U01  
586 MH46318, U01 MH79469, and U01 MH79470 and the genotyping of samples was provided  
587 through GAIN. The funding sources did not influence the study design, data analysis, or writing  
588 of this manuscript.

## 589 References

- 590
- 591 1. Schizophrenia Working Group of the Psychiatric Genomics Consortium. Biological insights  
592 from 108 schizophrenia-associated genetic loci. *Nature* 2014;511:421-427.
  - 593 2. Chan MK, Krebs MO, Cox D et al. Development of a blood-based molecular biomarker  
594 test for identification of schizophrenia before disease onset. *Transl Psychiatry*  
595 2015;5:e601.
  - 596 3. Benros ME, Nielsen PR, Nordentoft M, Eaton WW, Dalton SO, Mortensen PB.  
597 Autoimmune diseases and severe infections as risk factors for schizophrenia: a 30-year  
598 population-based register study. *Am J Psychiatry* 2011;168:1303-1310.
  - 599 4. Chen SJ, Chao YL, Chen CY et al. Prevalence of autoimmune diseases in in-patients with  
600 schizophrenia: nationwide population-based study. *Br J Psychiatry* 2012;200:374-380.
  - 601 5. Benros ME, Pedersen MG, Rasmussen H, Eaton WW, Nordentoft M, Mortensen PB. A  
602 nationwide study on the risk of autoimmune diseases in individuals with a personal or a  
603 family history of schizophrenia and related psychosis. *Am J Psychiatry* 2013
  - 604 6. Eaton WW, Byrne M, Ewald H et al. Association of schizophrenia and autoimmune  
605 diseases: linkage of Danish national registers. *Am J Psychiatry* 2006;163:521-528.
  - 606 7. Eaton WW, Pedersen MG, Nielsen PR, Mortensen PB. Autoimmune diseases, bipolar  
607 disorder, and non-affective psychosis. *Bipolar Disord* 2010;12:638-646.
  - 608 8. Euesden J, Breen G, Farmer A, McGuffin P, Lewis CM. The relationship between  
609 schizophrenia and rheumatoid arthritis revisited: genetic and epidemiological analyses.  
610 *Am J Med Genet B Neuropsychiatr Genet* 2015;168B:81-88.
  - 611 9. Sekar A, Bialas AR, de Rivera H et al. Schizophrenia risk from complex variation of  
612 complement component 4. *Nature* 2016;530:177-183.
  - 613 10. Yih Chen J, Ling Wu Y, Yin Mok M et al. Effects of complement C4 gene copy number  
614 variations, size dichotomy, and C4A deficiency on genetic risk and clinical presentation of  
615 systemic lupus erythematosus in East Asian populations. *Arthritis Rheumatol*  
616 2016;68:1442-1453.
  - 617 11. Pouget JG, Goncalves VF, Spain SL et al. Genome-wide association studies suggest  
618 limited immune gene enrichment in schizophrenia compared to 5 autoimmune diseases.  
619 *Schizophr Bull* 2016;42:1176-1184.
  - 620 12. Cross-Disorder Group of the Psychiatric Genomics Consortium. Identification of risk loci  
621 with shared effects on five major psychiatric disorders: a genome-wide analysis. *Lancet*  
622 2013;381:1371-1379.
  - 623 13. Cross-Disorder Group of the Psychiatric Genomics Consortium. Genetic relationship  
624 between five psychiatric disorders estimated from genome-wide SNPs. *Nat Genet*  
625 2013;45:984-994.
  - 626 14. Voight BF, Peloso GM, Orho-Melander M et al. Plasma HDL cholesterol and risk of  
627 myocardial infarction: a mendelian randomisation study. *Lancet* 2012;380:572-580.
  - 628 15. Do R, Willer CJ, Schmidt EM et al. Common variants associated with plasma triglycerides  
629 and risk for coronary artery disease. *Nat Genet* 2013;45:1345-1352.
  - 630 16. Bulik-Sullivan B, Finucane HK, Anttila V et al. An atlas of genetic correlations across  
631 human diseases and traits. *Nat Genet* 2015;47:1236-1241.
  - 632 17. Ellinghaus D, Jostins L, Spain SL et al. Analysis of five chronic inflammatory diseases  
633 identifies 27 new associations and highlights disease-specific patterns at shared loci. *Nat*  
634 *Genet* 2016;48:510-518.
  - 635 18. Stringer S, Kahn RS, de Witte LD, Ophoff RA, Derks EM. Genetic liability for  
636 schizophrenia predicts risk of immune disorders. *Schizophr Res* 2014;159:347-352.

- 637 19. Wang Q, Yang C, Gelernter J, Zhao H. Pervasive pleiotropy between psychiatric disorders  
638 and immune disorders revealed by integrative analysis of multiple GWAS. *Hum Genet*  
639 2015;134:1195-1209.
- 640 20. Tylee DS, Sun J, Hess JL et al. Genetic correlations among psychiatric and immune-  
641 related phenotypes based on genome-wide association data. *bioRxiv* 2018;doi:  
642 <https://doi.org/10.1101/070730>
- 643 21. Andreassen OA, Harbo HF, Wang Y et al. Genetic pleiotropy between multiple sclerosis  
644 and schizophrenia but not bipolar disorder: differential involvement of immune-related  
645 gene loci. *Mol Psychiatry* 2015;20:207-214.
- 646 22. Purcell SM, Wray NR, Stone JL et al. Common polygenic variation contributes to risk of  
647 schizophrenia and bipolar disorder. *Nature* 2009;460:748-752.
- 648 23. Lee SH, Byrne EM, Hultman CM et al. New data and an old puzzle: the negative  
649 association between schizophrenia and rheumatoid arthritis. *Int J Epidemiol*  
650 2015;44:1706-1721.
- 651 24. Wray NR, Goddard ME, Visscher PM. Prediction of individual genetic risk to disease from  
652 genome-wide association studies. *Genome Res* 2007;17:1520-1528.
- 653 25. Fernando MM, Stevens CR, Walsh EC et al. Defining the role of the MHC in autoimmunity:  
654 a review and pooled analysis. *PLoS Genet* 2008;4:e1000024.
- 655 26. Franke A, McGovern DP, Barrett JC et al. Genome-wide meta-analysis increases to 71 the  
656 number of confirmed Crohn's disease susceptibility loci. *Nat Genet* 2010;42:1118-1125.
- 657 27. Jostins L, Ripke S, Weersma RK et al. Host-microbe interactions have shaped the genetic  
658 architecture of inflammatory bowel disease. *Nature* 2012;491:119-124.
- 659 28. Beecham AH, Patsopoulos NA, Xifara DK et al. Analysis of immune-related loci identifies  
660 48 new susceptibility variants for multiple sclerosis. *Nat Genet* 2013;45:1353-1360.
- 661 29. Dubois PC, Trynka G, Franke L et al. Multiple common variants for celiac disease  
662 influencing immune gene expression. *Nat Genet* 2010;42:295-302.
- 663 30. Zhu Z, Zheng Z, Zhang F et al. Causal associations between risk factors and common  
664 diseases inferred from GWAS summary data. *Nat Commun* 2018;9:224.
- 665 31. Stahl EA, Wegmann D, Trynka G et al. Bayesian inference analyses of the polygenic  
666 architecture of rheumatoid arthritis. *Nat Genet* 2012;44:483-489.
- 667 32. Wood AR, Esko T, Yang J et al. Defining the role of common variation in the genomic and  
668 biological architecture of adult human height. *Nat Genet* 2014;46:1173-1186.
- 669 33. Lee SH, Goddard ME, Wray NR, Visscher PM. A better coefficient of determination for  
670 genetic profile analysis. *Genet Epidemiol* 2012;36:214-224.
- 671 34. Fairweather D, Frisancho-Kiss S, Rose NR. Sex differences in autoimmune disease from  
672 a pathological perspective. *Am J Pathol* 2008;173:600-609.
- 673 35. Purcell SM, Moran JL, Fromer M et al. A polygenic burden of rare disruptive mutations in  
674 schizophrenia. *Nature* 2014;506:185-190.
- 675 36. Feske S. Calcium signalling in lymphocyte activation and disease. *Nat Rev Immunol*  
676 2007;7:690-702.
- 677 37. Canellas F, Lin L, Julia MR et al. Dual cases of type 1 narcolepsy with schizophrenia and  
678 other psychotic disorders. *J Clin Sleep Med* 2014;10:1011-1018.
- 679 38. Arad M, Weiner I. Disruption of latent inhibition induced by ovariectomy can be reversed  
680 by estradiol and clozapine as well as by co-administration of haloperidol with estradiol but  
681 not by haloperidol alone. *Psychopharmacology (Berl)* 2009;206:731-740.
- 682 39. Zhu ML, Bakhru P, Conley B et al. Sex bias in CNS autoimmune disease mediated by  
683 androgen control of autoimmune regulator. *Nat Commun* 2016;7:11350.
- 684 40. Markle JG, Frank DN, Mortin-Toth S et al. Sex differences in the gut microbiome drive  
685 hormone-dependent regulation of autoimmunity. *Science* 2013;339:1084-1088.

- 686 41. Zammit S, Rasmussen F, Farahmand B et al. Height and body mass index in young  
687 adulthood and risk of schizophrenia: a longitudinal study of 1 347 520 Swedish men. *Acta*  
688 *Psychiatr Scand* 2007;116:378-385.
- 689 42. Takayanagi Y, Petersen L, Laursen TM et al. Risk of schizophrenia spectrum and affective  
690 disorders associated with small for gestational age birth and height in adulthood.  
691 *Schizophr Res* 2014;160:230-232.
- 692 43. Trynka G, Hunt KA, Bockett NA et al. Dense genotyping identifies and localizes multiple  
693 common and rare variant association signals in celiac disease. *Nat Genet* 2011;43:1193-  
694 1201.
- 695 44. Liu JZ, van Sommeren S, Huang H et al. Association analyses identify 38 susceptibility  
696 loci for inflammatory bowel disease and highlight shared genetic risk across populations.  
697 *Nat Genet* 2015;47:979-986.
- 698 45. Hinks A, Cobb J, Marion MC et al. Dense genotyping of immune-related disease regions  
699 identifies 14 new susceptibility loci for juvenile idiopathic arthritis. *Nat Genet* 2013;45:664-  
700 669.
- 701 46. Faraco J, Lin L, Kornum BR et al. ImmunoChip study implicates antigen presentation to T  
702 cells in narcolepsy. *PLoS Genet* 2013;9:e1003270.
- 703 47. Stahl EA, Raychaudhuri S, Remmers EF et al. Genome-wide association study meta-  
704 analysis identifies seven new rheumatoid arthritis risk loci. *Nat Genet* 2010;42:508-514.
- 705 48. Bentham J, Morris DL, Cunninghame Graham DS et al. Genetic association analyses  
706 implicate aberrant regulation of innate and adaptive immunity genes in the pathogenesis of  
707 systemic lupus erythematosus. *Nat Genet* 2015;47:1457-1464.
- 708 49. Onengut-Gumuscu S, Chen WM, Burren O et al. Fine mapping of type 1 diabetes  
709 susceptibility loci and evidence for colocalization of causal variants with lymphoid gene  
710 enhancers. *Nat Genet* 2015;47:381-386.
- 711 50. Cordell HJ, Han Y, Mells GF et al. International genome-wide meta-analysis identifies new  
712 primary biliary cirrhosis risk loci and targetable pathogenic pathways. *Nat Commun*  
713 2015;6:8019.
- 714 51. Strange A, Capon F, Spencer CC et al. A genome-wide association study identifies new  
715 psoriasis susceptibility loci and an interaction between HLA-C and ERAP1. *Nat Genet*  
716 2010;42:985-990.
- 717 52. Radstake TR, Gorlova O, Rueda B et al. Genome-wide association study of systemic  
718 sclerosis identifies CD247 as a new susceptibility locus. *Nat Genet* 2010;42:426-429.
- 719 53. Jin Y, Andersen G, Yorgov D et al. Genome-wide association studies of autoimmune  
720 vitiligo identify 23 new risk loci and highlight key pathways and regulatory variants. *Nat*  
721 *Genet* 2016;48:1418-1424.
- 722 54. R Core Team. R: A language and environment for statistical computing. *R Foundation for*  
723 *Statistical Computing* 2012;Vienna, Austria. ISBN 3-900051-07-0, URL [http://www.R-](http://www.R-project.org/)  
724 [project.org/](http://www.R-project.org/).
- 725 55. Nakazawa M. fmsb: Functions for medical statistics book with some demographic data. *R*  
726 *package version 0.5.1*. 2014<http://CRAN.R-project.org/package=fmsb>.
- 727 56. Bulik-Sullivan BK, Loh PR, Finucane HK et al. LD Score regression distinguishes  
728 confounding from polygenicity in genome-wide association studies. *Nat Genet*  
729 2015;47:291-295.
- 730 57. Finucane HK, Bulik-Sullivan B, Gusev A et al. Partitioning heritability by functional  
731 annotation using genome-wide association summary statistics. *Nat Genet* 2015;47:1228-  
732 1235.
- 733 58. Psychiatric GWAS Consortium Bipolar Disorder Working Group. Large-scale genome-wide  
734 association analysis of bipolar disorder identifies a new susceptibility locus near ODZ4.  
735 *Nat Genet* 2011;43:977-983.



- 736 59. Abecasis GR, Auton A, Brooks LD et al. An integrated map of genetic variation from 1,092  
737 human genomes. *Nature* 2012;491:56-65.
- 738 60. International HapMap 3 Consortium, Altshuler DM, Gibbs RA et al. Integrating common  
739 and rare genetic variation in diverse human populations. *Nature* 2010;467:52-58.
- 740 61. Purcell S, Cherny SS, Sham PC. Genetic Power Calculator: design of linkage and  
741 association genetic mapping studies of complex traits. *Bioinformatics* 2003;19:149-150.
- 742 62. Palla L, Dudbridge F. A fast method that uses polygenic scores to estimate the variance  
743 explained by genome-wide marker panels and the proportion of variants affecting a trait.  
744 *Am J Hum Genet* 2015;97:250-259.
- 745 63. Dudbridge F. Power and predictive accuracy of polygenic risk scores. *PLoS Genet*  
746 2013;9:e1003348.
- 747 64. Betz RC, Petukhova L, Ripke S et al. Genome-wide meta-analysis in alopecia areata  
748 resolves HLA associations and reveals two new susceptibility loci. *Nat Commun*  
749 2015;6:5966.
- 750 65. Cortes A, Hadler J, Pointon JP et al. Identification of multiple risk variants for ankylosing  
751 spondylitis through high-density genotyping of immune-related loci. *Nat Genet*  
752 2013;45:730-738.
- 753 66. Chu X, Pan CM, Zhao SX et al. A genome-wide association study identifies two new risk  
754 loci for Graves' disease. *Nat Genet* 2011;43:897-901.
- 755 67. Gutierrez-Achury J, Zhernakova A, Pulit SL et al. Fine mapping in the MHC region  
756 accounts for 18% additional genetic risk for celiac disease. *Nat Genet* 2015;47:577-578.
- 757 68. Goyette P, Boucher G, Mallon D et al. High-density mapping of the MHC identifies a  
758 shared role for HLA-DRB1\*01:03 in inflammatory bowel diseases and heterozygous  
759 advantage in ulcerative colitis. *Nat Genet* 2015;47:172-179.
- 760 69. Patsopoulos NA, Barcellos LF, Hintzen RQ et al. Fine-mapping the genetic association of  
761 the major histocompatibility complex in multiple sclerosis: HLA and non-HLA effects. *PLoS*  
762 *Genet* 2013;9:e1003926.
- 763 70. Tafti M, Hor H, Dauvilliers Y et al. DQB1 locus alone explains most of the risk and  
764 protection in narcolepsy with cataplexy in Europe. *Sleep* 2014;37:19-25.
- 765 71. Liu JZ, Almarri MA, Gaffney DJ et al. Dense fine-mapping study identifies new  
766 susceptibility loci for primary biliary cirrhosis. *Nat Genet* 2012;44:1137-1141.
- 767 72. Liu JZ, Hov JR, Folseraas T et al. Dense genotyping of immune-related disease regions  
768 identifies nine new risk loci for primary sclerosing cholangitis. *Nat Genet* 2013;45:670-675.
- 769 73. Okada Y, Han B, Tsoi LC et al. Fine mapping major histocompatibility complex  
770 associations in psoriasis and its clinical subtypes. *Am J Hum Genet* 2014;95:162-172.
- 771 74. Raychaudhuri S, Sandor C, Stahl EA et al. Five amino acids in three HLA proteins explain  
772 most of the association between MHC and seropositive rheumatoid arthritis. *Nat Genet*  
773 2012;44:291-296.
- 774 75. Lessard CJ, Li H, Adrianto I et al. Variants at multiple loci implicated in both innate and  
775 adaptive immune responses are associated with Sjogren's syndrome. *Nat Genet*  
776 2013;45:1284-1292.
- 777 76. Kim K, Bang SY, Lee HS et al. The HLA-DRbeta1 amino acid positions 11-13-26 explain  
778 the majority of SLE-MHC associations. *Nat Commun* 2014;5:5902.
- 779 77. Mayes MD, Bossini-Castillo L, Gorlova O et al. Immunochip analysis identifies multiple  
780 susceptibility loci for systemic sclerosis. *Am J Hum Genet* 2014;94:47-61.
- 781 78. Hu X, Deutsch AJ, Lenz TL et al. Additive and interaction effects at three amino acid  
782 positions in HLA-DQ and HLA-DR molecules drive type 1 diabetes risk. *Nat Genet*  
783 2015;47:898-905.
- 784 79. Terunuma M, Jang IS, Ha SH et al. GABAA receptor phospho-dependent modulation is  
785 regulated by phospholipase C-related inactive protein type 1, a novel protein phosphatase  
786 1 anchoring protein. *J Neurosci* 2004;24:7074-7084.



- 787 80. Lin X, Varnai P, Csordas G et al. Control of calcium signal propagation to the mitochondria  
788 by inositol 1,4,5-trisphosphate-binding proteins. *J Biol Chem* 2005;280:12820-12832.
- 789 81. Yokoyama K, Su IH, Tezuka T et al. BANK regulates BCR-induced calcium mobilization  
790 by promoting tyrosine phosphorylation of IP(3) receptor. *EMBO J* 2002;21:83-92.
- 791 82. Mitkovski M, Dahm L, Heinrich R et al. Erythropoietin dampens injury-induced microglial  
792 motility. *J Cereb Blood Flow Metab* 2015;35:1233-1236.
- 793 83. Tong Q, Hirschler-Laszkiewicz I, Zhang W et al. TRPC3 is the erythropoietin-regulated  
794 calcium channel in human erythroid cells. *J Biol Chem* 2008;283:10385-10395.
- 795 84. Chang CL, Liou J. Phosphatidylinositol 4,5-bisphosphate homeostasis regulated by Nir2  
796 and Nir3 proteins at endoplasmic reticulum-plasma membrane junctions. *J Biol Chem*  
797 2015;290:14289-14301.
- 798 85. The GTEx Consortium. The Genotype-Tissue Expression (GTEx) pilot analysis:  
799 multitissue gene regulation in humans. *Science* 2015;348:648-660.
- 800 86. Westra HJ, Peters MJ, Esko T et al. Systematic identification of trans eQTLs as putative  
801 drivers of known disease associations. *Nat Genet* 2013;45:1238-1243.
- 802

## 803 Figure Legends

### 804 Fig 1. Identification of pleiotropic HLA variants

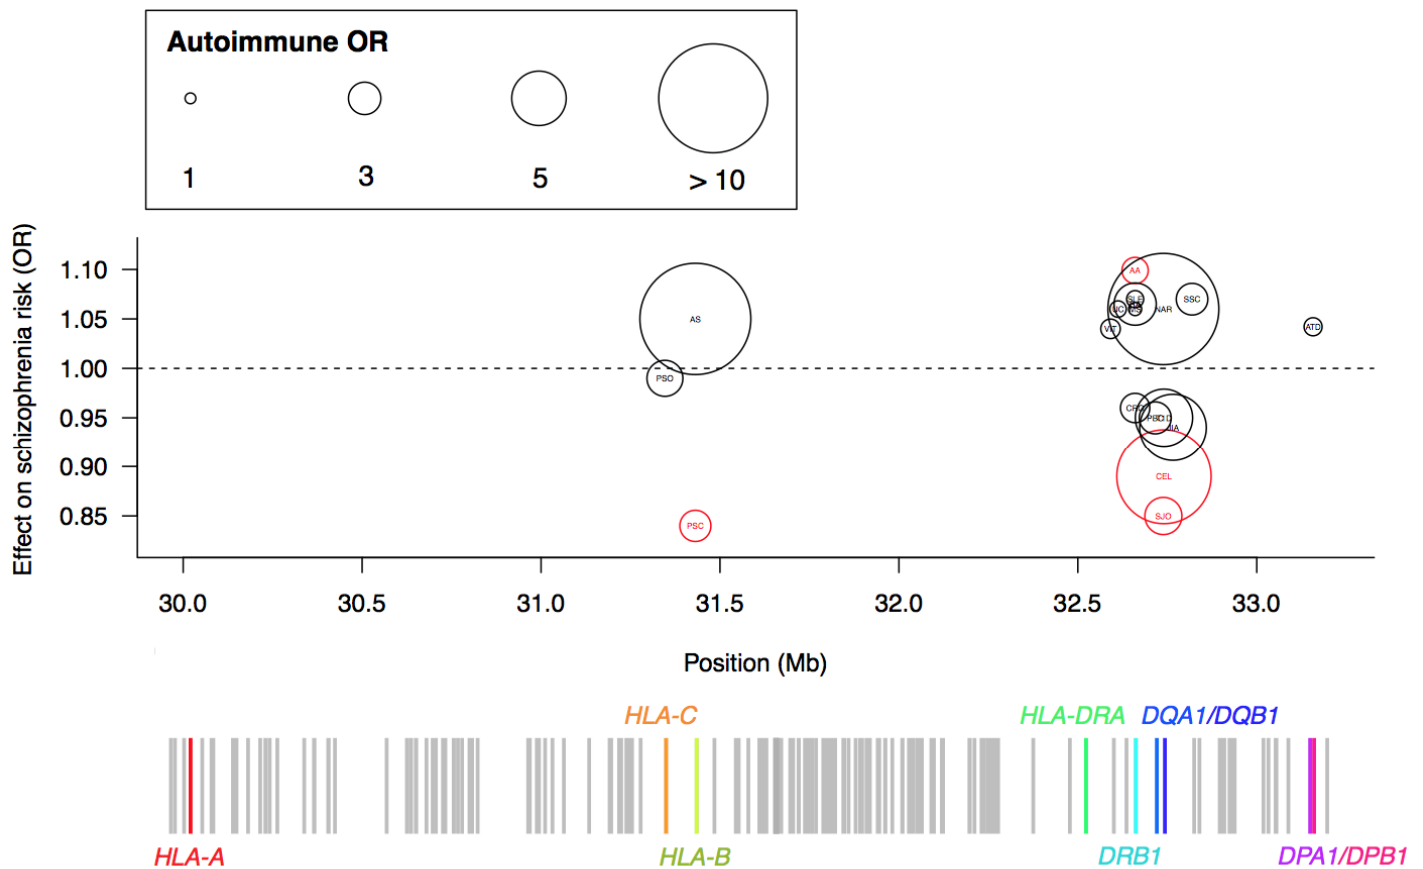

805 The most strongly associated HLA variant for each of the 19 immune-mediated diseases was  
 806 evaluated for association with schizophrenia, using summary statistics from HLA imputation and  
 807 association testing in the schizophrenia dataset as previously described (9). x-axis corresponds  
 808 to position in the classical HLA region, shown in megabase pairs (Mb); y-axis corresponds to  
 809 the HLA variant's odds ratio (OR) in schizophrenia. Dashed line indicates OR=1. Size of the  
 810 circle corresponds to the HLA variant's OR in the immune disease of interest, which is indicated  
 811 in the circle center. Red circles indicate HLA variants associated with schizophrenia above the  
 812 Bonferroni significance threshold ( $p < 8.6 \times 10^{-5}$ ). Gene map below indicates location of coding  
 813 HLA genes (coloured lines); gray lines correspond to non-HLA genes in the region. Disease  
 814 abbreviations as defined in **Table 1**.

815 **Fig 2. Genetic correlation between schizophrenia and other traits**

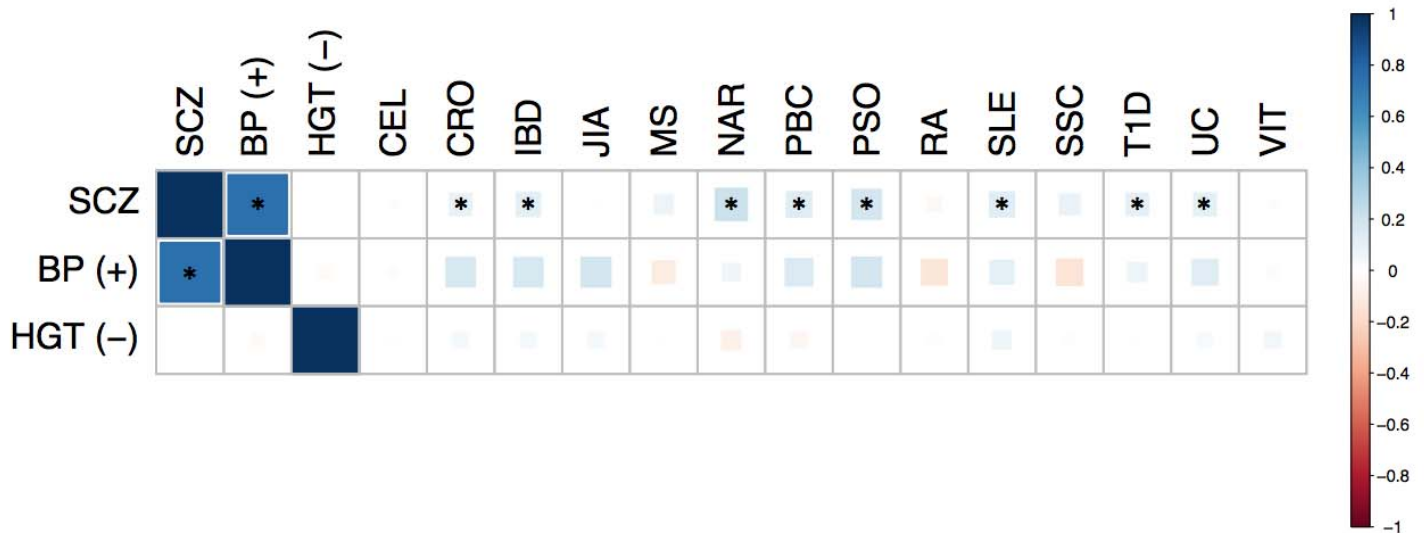

816 Genetic correlation between schizophrenia, bipolar disorder, height, and 14 immune diseases  
 817 was estimated using cross-trait LDSC (16). Colour of square indicates strength of genetic  
 818 correlation (red, negative correlation; blue, positive correlation). Size of square indicates  
 819 statistical significance (larger, more significant  $p$ -value). Asterisks indicate genetic correlations  
 820 that are statistically significant at  $p < 0.05$  threshold. BP, bipolar disorder; CEL, celiac disease;  
 821 CRO, Crohn's disease; HGT, height; IBD, inflammatory bowel disease; JIA, juvenile idiopathic  
 822 arthritis; MS, multiple sclerosis; NAR, narcolepsy; PBC, primary biliary cirrhosis; PSO, psoriasis,  
 823 RA, rheumatoid arthritis; SLE, systemic lupus erythematosus; SSC, systemic sclerosis; T1D,  
 824 type 1 diabetes; UC, ulcerative colitis; VIT, vitiligo.

825 **Tables**826 **Table 1. Description of datasets analyzed**

| Disease                        | Abr | Genome-wide significant SNPs <sup>a</sup> | Polygenic risk scoring <sup>b</sup> | Cases              | Controls           | Total number of SNPs |                              |                     |
|--------------------------------|-----|-------------------------------------------|-------------------------------------|--------------------|--------------------|----------------------|------------------------------|---------------------|
|                                |     |                                           |                                     |                    |                    | Full GWAS            | Merged with SCZ <sup>c</sup> | Pruned <sup>d</sup> |
| Schizophrenia                  | SCZ | -                                         | Target (1)                          | 35,476             | 46,839             | -                    | -                            | -                   |
| Height                         | HGT | -                                         | Negative control (32)               | 253,288            | -                  | 2,085,602            | 2,035,446                    | 124,888             |
| Alopecia areata                | AA  | 11                                        | -                                   | -                  | -                  | -                    | -                            | -                   |
| Ankylosing spondylitis         | AS  | 23                                        | -                                   | -                  | -                  | -                    | -                            | -                   |
| Autoimmune thyroid disease     | ATD | 7                                         | -                                   | -                  | -                  | -                    | -                            | -                   |
| Celiac disease                 | CEL | 38                                        | Training (43)                       | 12,041             | 12,228             | 133,352              | 90,922                       | 19,698              |
| Crohn's disease                | CRO | 119                                       | Training (44)                       | 5,956              | 14,927             | 12,276,506           | 4,990,991                    | 114,950             |
| Inflammatory bowel disease     | IBD | 145                                       | Training (44)                       | 12,882             | 21,770             | 12,716,150           | 5,095,448                    | 116,346             |
| Juvenile idiopathic arthritis  | JIA | 22                                        | Training (45)                       | 772 <sup>e</sup>   | 8,530 <sup>e</sup> | 122,330              | 98,477                       | 20,337              |
| Multiple sclerosis             | MS  | 103                                       | Training (28)                       | 14,498             | 24,091             | 155,756              | 108,118                      | 21,818              |
| Narcolepsy                     | NAR | 3                                         | Training (46)                       | 1,886              | 10,421             | 109,768              | 92,859                       | 19,866              |
| Primary biliary cirrhosis      | PBC | 19                                        | Training (50)                       | 2,764              | 10,475             | 1,038,537            | 1,041,977                    | 97,806              |
| Primary sclerosing cholangitis | PSC | 12                                        | -                                   | -                  | -                  | -                    | -                            | -                   |
| Psoriasis                      | PSO | 34                                        | Training (51)                       | 2,178              | 5,175              | 7,586,779            | 3,701,354                    | 107,002             |
| Rheumatoid arthritis           | RA  | 77                                        | Training (47)                       | 5,539              | 20,169             | 2,090,825            | 2,087,383                    | 126,049             |
| Sjögren's syndrome             | SJO | 6                                         | -                                   | -                  | -                  | -                    | -                            | -                   |
| Systemic lupus erythematosus   | SLE | 19                                        | Training (48)                       | 4,036              | 6,959              | 7,915,251            | 6,539,217                    | 264,374             |
| Systemic sclerosis             | SSC | 4                                         | Training (52)                       | 1,486 <sup>f</sup> | 3,477 <sup>f</sup> | 253,179              | 251,441                      | 66,402              |
| Type 1 diabetes                | T1D | 56                                        | Training (49)                       | 9,340 <sup>g</sup> | 12,835             | 123,081              | 98,418                       | 20,835              |
| Ulcerative colitis             | UC  | 96                                        | Training (44)                       | 6,968              | 20,464             | 12,255,263           | 5,167,266                    | 120,720             |
| Vitiligo                       | VIT | 16                                        | Training (53)                       | 1,381              | 14,518             | 8,790,155            | 6,223,502                    | 257,654             |

827 <sup>a</sup>We obtained lists of genome-wide significant SNPs for each autoimmune disease from ImmunoBase, and processed them as described in  
828 **Supplementary Methods**; <sup>b</sup>The following columns provide details for datasets used in the polygenic risk scoring analysis. We used effect sizes  
829 obtained from the height (negative control) and autoimmune disease GWASs (training datasets) to construct polygenic risk scores in the

830 schizophrenia sample (target dataset). Because genome-wide summary statistics were required for this analysis, we were unable to perform  
831 polygenic risk scoring for five autoimmune diseases for which these data were not available (AA, AS, ATD, PSC, SJO); <sup>c</sup>Prior to merging the  
832 training dataset SNP set with the target schizophrenia dataset SNP set, the following quality control steps were performed: SNPs on non-  
833 autosomal chromosomes (X, Y, M) were removed, SNPs with MAF<0.01 were removed if MAF was available in the training dataset, SNPs with  
834 INFO<0.90 were removed if INFO was available in the training dataset, SNPs with missing p-value or OR were removed, symmetrical SNPs were  
835 removed; <sup>d</sup>Pruning was performed by clumping using PLINK to retain SNPs with  $r^2$ <0.1 within 1,000 kb windows, while filtering for the highest  
836 significance levels within LD blocks (using options --clump-p1 1 --clump-p2 1 --clump-r2 0.1 --clump-kb 1000); <sup>e</sup>only the UK cohort from this study  
837 was available for analysis; <sup>f</sup>only the US cohort from this study was available for analysis; <sup>g</sup>includes cases from 2,601 affected sibling pairs and 69  
838 trios, which were analyzed using the Generalized Disequilibrium Test (GDT) method and combined with case-control results by meta-analysis;  
839 Abr, abbreviation; -, not analyzed.

840 **Table 2. Association of top HLA variants for immune diseases in schizophrenia**

| Disease         | HLA variant                               | Autoimmune                    |                   | Schizophrenia                |                   | r <sup>2</sup> with top SCZ SNP <sup>a</sup> |
|-----------------|-------------------------------------------|-------------------------------|-------------------|------------------------------|-------------------|----------------------------------------------|
|                 |                                           | p                             | OR                | p                            | OR                |                                              |
| <b>AA (64)</b>  | <b>HLA-DRB1#37Asn</b>                     | <b>4.99x10<sup>-73</sup></b>  | <b>0.42</b>       | <b>4.85x10<sup>-9</sup></b>  | <b>0.91</b>       | <b>0.04</b>                                  |
| AS (65)         | HLA-B*27                                  | <1x10 <sup>-100</sup>         | 46                | 0.13                         | 1.05              | 0                                            |
| ATD (66)        | rs2281388<br>(tags HLA-DPB1*05:01)        | 1.50x10 <sup>-65</sup>        | 1.64              | 0.39                         | 1.04 <sup>b</sup> | 0                                            |
| <b>CEL (67)</b> | <b>HLA-DQB1#74A1a</b>                     | <b>n.r.</b>                   | <b>2.14</b>       | <b>2.16x10<sup>-12</sup></b> | <b>0.89</b>       | <b>0.11</b>                                  |
| CRO (68)        | HLA-DRB1*01:03                            | 3.00x10 <sup>-62</sup>        | 2.51              | 0.61                         | 0.96              | 0                                            |
| IBD (68)        | HLA-DRB1*01:03                            | 1.93x10 <sup>-112</sup>       | 3.01              | 0.61                         | 0.96              | 0                                            |
| JIA (45)        | rs7775055                                 | 3.14x10 <sup>-174</sup>       | 6.01              | 0.12                         | 0.94              | 0                                            |
| MS (69)         | HLA-DRB1*15:01                            | 1.40x10 <sup>-234</sup>       | 2.92              | 5.10x10 <sup>-3</sup>        | 1.06              | 0                                            |
| NAR (70)        | HLA-DQB1*06:02                            | 1.04x10 <sup>-120</sup>       | 251               | 7.30x10 <sup>-3</sup>        | 1.06              | 0                                            |
| PBC (71)        | HLA-DQA1*04:01                            | 5.90x10 <sup>-45</sup>        | 3.06              | 0.20                         | 0.95              | 0                                            |
| <b>PSC (72)</b> | <b>HLA-B*08:01</b>                        | <b>3.70x10<sup>-246</sup></b> | <b>2.82</b>       | <b>5.65x10<sup>-16</sup></b> | <b>0.84</b>       | <b>0.2</b>                                   |
| PSO (73)        | HLA-C*06:02                               | 2.10x10 <sup>-201</sup>       | 3.26              | 0.55                         | 0.99              | 0                                            |
| RA (74)         | HLA-DRB1#11Val                            | <1x10 <sup>-581</sup>         | 3.80              | 2.68x10 <sup>-4</sup>        | 1.07              | 0                                            |
| <b>SJO (75)</b> | <b>HLA-DQB1*02:01</b>                     | <b>1.38x10<sup>-95</sup></b>  | <b>3.36</b>       | <b>3.84x10<sup>-15</sup></b> | <b>0.85</b>       | <b>0.11</b>                                  |
| SLE (76)        | HLA-DRB1#13Arg                            | 7.99x10 <sup>-10</sup>        | 1.55 <sup>c</sup> | 5.81x10 <sup>-4</sup>        | 1.07              | 0                                            |
| SSC (77)        | rs17500468 (TAP2)                         | 5.87x10 <sup>-62</sup>        | 2.87              | 6.76x10 <sup>-4</sup>        | 1.07              | 0                                            |
| T1D (78)        | HLA-DQB1#57A1a                            | <1x10 <sup>-1000</sup>        | 5.17              | 7.80x10 <sup>-4</sup>        | 0.95              | 0.06                                         |
| UC (68)         | rs6927022                                 | 8.00x10 <sup>-154</sup>       | 1.49              | 3.37x10 <sup>-4</sup>        | 1.06              | 0.03                                         |
| VIT (53)        | rs9271597<br>(4.7kb upstream of HLA-DQA1) | 3.15x10 <sup>-89</sup>        | 1.77              | 0.01                         | 1.04              | 0                                            |

841 <sup>a</sup>r<sup>2</sup> with rs12333578, the top HLA variant in schizophrenia, was obtained from the GAIN schizophrenia cohort (mgs2); <sup>b</sup>Effect size estimate is for  
 842 HLA-DPB1\*05:01; <sup>c</sup>Effect size estimate obtained from Asian sample. AA, alopecia areata; AS, ankylosing spondylitis; ATD, autoimmune thyroid  
 843 disease; CEL, celiac disease; CRO, Crohn's disease; IBD, inflammatory bowel disease; JIA, juvenile idiopathic arthritis; MS, multiple sclerosis;  
 844 NAR, narcolepsy; n.r., not reported; PBC, primary biliary cirrhosis; PSC, primary sclerosing cholangitis; PSO, psoriasis, RA, rheumatoid arthritis;  
 845 SJO, Sjögren's syndrome; SLE, systemic lupus erythematosus; SSC, systemic sclerosis; T1D, type 1 diabetes; UC, ulcerative colitis; VIT, vitiligo.

846 **Table 3. Immune disease risk SNPs showing pleiotropic effect in schizophrenia**

| SNP (chr:bp)                | Immune Disease        | Risk Allele/<br>Non-Risk Allele | Immune OR (95% CI); p <sup>a</sup>       | Schizophrenia OR (95% CI); p            | Closest Gene               | eQTL <sup>b</sup>                                                 | Function                                                                                                                                                                                                     |
|-----------------------------|-----------------------|---------------------------------|------------------------------------------|-----------------------------------------|----------------------------|-------------------------------------------------------------------|--------------------------------------------------------------------------------------------------------------------------------------------------------------------------------------------------------------|
| rs296547 (chr1:200892137)   | CEL (29)              | G/A                             | 1.12 (1.09-1.16); 4.11x10 <sup>-9</sup>  | 1.04 (1.02-1.07); 6.17x10 <sup>-5</sup> | <i>C1orf106</i> (7.3kb 3') | <i>C1orf106</i> , inconsistent direction of effect across tissues | Unknown function                                                                                                                                                                                             |
|                             |                       |                                 |                                          |                                         |                            | Other genes                                                       |                                                                                                                                                                                                              |
| rs6738825 (chr2:198896895)  | CRO (26)              | A/G                             | 1.06 (1.02-1.11); 3.50x10 <sup>-9</sup>  | 1.05 (1.03-1.07); 3.02x10 <sup>-6</sup> | <i>PLCL1</i> (intronic)    | <i>PLCL1</i> , decreased expression                               | Regulates GABA <sub>A</sub> receptor signaling (79), inhibits IP <sub>3</sub> mediated calcium signalling (80)                                                                                               |
|                             |                       |                                 |                                          |                                         |                            | <i>RFTN2</i> , decreased expression                               |                                                                                                                                                                                                              |
| rs13126505 (chr4:102865304) | CRO <sup>b</sup> (27) | A/G                             | 1.17 (1.10-1.25); 2.33x10 <sup>-10</sup> | 1.14 (1.10-1.19); 1.19x10 <sup>-8</sup> | <i>BANK1</i> (intronic)    | <i>BANK1</i> , decreased expression <sup>c</sup>                  | B-cell-specific scaffold protein that mediates receptor-induced calcium mobilization from intracellular stores (81)                                                                                          |
| rs1734907 (chr7:100315517)  | CRO <sup>b</sup> (27) | A/G                             | 1.16 (1.11-1.21); 1.67x10 <sup>-13</sup> | 1.07 (1.04-1.10); 7.55x10 <sup>-6</sup> | <i>EPO</i> (2.9kb 5')      | <i>EPHB4</i> , decreased expression                               | Found in plasma, regulates red cell production by promoting erythroid differentiation and initiating hemoglobin synthesis; neuroprotective activity (82); increases intracellular calcium concentration (83) |
|                             |                       |                                 |                                          |                                         |                            | <b><i>GIGYF1</i></b> , increased expression                       |                                                                                                                                                                                                              |
|                             |                       |                                 |                                          |                                         |                            | Other genes                                                       |                                                                                                                                                                                                              |
| rs7132277 (chr12:123593382) | MS (28)               | A/G                             | 1.12 (n.r.); 1.90x10 <sup>-13</sup>      | 1.07 (1.04-1.09); 2.52x10 <sup>-6</sup> | <i>PITPNM2</i> (intronic)  | <i>ABCB9</i> , increased expression                               | Replenishes PIP <sub>2</sub> in plasma membrane, the major substrate for IP <sub>3</sub> -related calcium channel activation (84)                                                                            |
|                             |                       |                                 |                                          |                                         |                            | Other genes                                                       |                                                                                                                                                                                                              |

847 <sup>a</sup>Effect sizes and p-values reported based on Immunobase curation, which reports statistics from meta-analysis of discovery and replication datasets where  
 848 available; <sup>b</sup>cis-eQTL data from The GTEx Consortium (85) (<http://gtexportal.org>) and Westra *et al.* (86) (<http://www.genenetwork.nl/bloodseqtlbrowser/>); all genes  
 849 with FDR<0.05 are listed, effect on expression (increased/decreased) corresponds to the risk allele; <sup>b</sup>Also associated with inflammatory bowel disease; <sup>c</sup>eQTL  
 850 results presented are for proxy SNP rs13127398, r<sup>2</sup>=0.89 with rs13126505; Disease abbreviations as defined in **Table 1**; bold font indicates brain eQTLs.
