1 **Cross-disorder analysis of schizophrenia and 19 immune diseases reveals**  
2 **genetic correlation**

3 **Short Title: Genetic correlation between schizophrenia and immune diseases**

4 Jennie G Pouget<sup>1,2,3</sup>, Schizophrenia Working Group of the Psychiatric Genomics  
5 Consortium<sup>^</sup>, Buhm Han<sup>4</sup>, Yang Wu<sup>5</sup>, Emmanuel Mignot<sup>6</sup>, Hanna M Ollila<sup>6,7,8</sup>, Jonathan  
6 Barker<sup>9,10</sup>, Sarah Spain<sup>9,11</sup>, Nick Dand<sup>9</sup>, Richard Trembath<sup>9,12</sup>, Javier Martin<sup>13</sup>, Maureen  
7 D Mayes<sup>14</sup>, Lara Bossini-Castillo<sup>11</sup>, Elena López-Isac<sup>13</sup>, Ying Jin<sup>15,16</sup>, Stephanie A  
8 Santorico<sup>15,17,18</sup>, Richard A Spritz<sup>15,16</sup>, Soumya Raychaudhuri<sup>19,20,21,22,23,24</sup>\*, Jo  
9 Knight<sup>1,2,3,25</sup>†\*

10 <sup>1</sup>Campbell Family Mental Health Research Institute, Centre for Addiction and Mental Health, Toronto, ON,  
11 Canada, <sup>2</sup>Institute of Medical Sciences, University of Toronto, Toronto, ON, Canada, <sup>3</sup>Department of  
12 Psychiatry, University of Toronto, Toronto, ON, Canada, <sup>4</sup>Department of Biomedical Sciences, Seoul  
13 National University College of Medicine, Seoul, Republic of Korea, <sup>5</sup>Institute for Molecular Bioscience,  
14 The University of Queensland, Brisbane, QLD 4072, Australia, <sup>6</sup>Center for Sleep Sciences and Medicine,  
15 Department of Psychiatry and Behavioral Sciences, Stanford University, School of Medicine, Palo Alto,  
16 CA, USA, <sup>7</sup>Finnish Institute for Molecular Medicine, Helsinki, Finland, <sup>8</sup>Center for Genomic Medicine,  
17 Massachusetts General Hospital, Boston, Massachusetts, USA and Broad Institute, Cambridge,  
18 Massachusetts, USA, <sup>9</sup>School of Basic and Medical Biosciences, Faculty of Life Sciences and Medicine,  
19 King's College London, UK, <sup>10</sup>St. John's Institute of Dermatology, Faculty of Life Sciences and Medicine,  
20 King's College London, London, UK, <sup>11</sup>Wellcome Trust Sanger Institute, Wellcome Trust Genome  
21 Campus, Hinxton, Cambridge, UK, <sup>12</sup>Queen Mary University of London, Barts and the London School of  
22 Medicine and Dentistry, London, UK, <sup>13</sup>Institute of Parasitology and Biomedicine López-Neyra, IPBLN-  
23 CSIC, Granada, Spain, <sup>14</sup>The University of Texas Health Science Center–Houston, Houston, TX, USA,  
24 <sup>15</sup>Human Medical Genetics and Genomics Program and <sup>16</sup>Department of Pediatrics, University of  
25 Colorado School of Medicine, Aurora, CO, USA, <sup>17</sup>Department of Mathematical and Statistical Sciences,  
26 University of Colorado Denver, Denver, CO, USA, <sup>18</sup>Department of Biostatistics and Informatics, Colorado  
27 School of Public Health, University of Colorado, Aurora, CO, USA, <sup>19</sup>Department of Medicine, Brigham  
28 and Women's Hospital and Harvard Medical School, Boston, MA, USA, <sup>20</sup>Partners HealthCare Center for  
29 Personalized Genetic Medicine, Boston, MA, USA, <sup>21</sup>Program in Medical and Population Genetics, Broad  
30 Institute of MIT and Harvard, Cambridge, MA, USA, <sup>22</sup>Division of Genetics, and <sup>23</sup>Division of  
31 Rheumatology, Brigham and Women's Hospital, Harvard Medical School, Boston, MA, USA, <sup>24</sup>Faculty of  
32 Medical and Human Sciences, University of Manchester, Manchester, UK, <sup>25</sup>Lancaster Medical School  
33 and Data Science Institute, Lancaster University, Lancaster, UK.

34 \*Corresponding authors  
35 Email: [soumya@broadinstitute.org](mailto:soumya@broadinstitute.org) (SR)  
36 Email: [jo.knight@lancaster.ac.uk](mailto:jo.knight@lancaster.ac.uk) (JK)

37 †These authors contributed equally to this work

38 ^Membership of the Schizophrenia Working Group of the Psychiatric Genomics Consortium is provided in  
39 the **Supporting Information**.

## 40 **Abstract**

41       Epidemiological studies indicate that many immune diseases occur at different rates  
42 among people with schizophrenia compared to the general population. Here, we evaluated  
43 whether this phenotypic correlation between immune diseases and schizophrenia might be  
44 explained by shared genetic risk factors (**genetic correlation**). We used data from a large  
45 genome-wide association study (GWAS) of schizophrenia (N=35,476 cases and 46,839  
46 controls) to compare the genetic architecture of schizophrenia to 19 immune diseases. First, we  
47 evaluated the association with schizophrenia of 581 variants previously reported to be  
48 associated with immune diseases at genome-wide significance. We identified three variants with  
49 pleiotropic effects, located in regions associated with both schizophrenia and immune disease.  
50 Our analyses provided the strongest evidence of pleiotropy at rs1734907 (~85kb upstream of  
51 *EPHB4*), a variant which was associated with increased risk of both Crohn's disease (OR =  
52 1.16,  $P = 1.67 \times 10^{-13}$ ) and schizophrenia (OR = 1.07,  $P = 7.55 \times 10^{-6}$ ). Next, we investigated  
53 genome-wide sharing of common variants between schizophrenia and immune diseases using  
54 polygenic risk scores (PRS) and cross-trait LD Score regression (LDSC). PRS revealed  
55 significant genetic overlap with schizophrenia for narcolepsy ( $p=4.1 \times 10^{-4}$ ), primary biliary  
56 cirrhosis ( $p=1.4 \times 10^{-8}$ ), psoriasis ( $p=3.6 \times 10^{-5}$ ), systemic lupus erythematosus ( $p=2.2 \times 10^{-8}$ ), and  
57 ulcerative colitis ( $p=4.3 \times 10^{-4}$ ). Genetic correlations between these immune diseases and  
58 schizophrenia, estimated using LDSC, ranged from 0.10 to 0.18 and were consistent with the  
59 expected phenotypic correlation based on epidemiological data. We also observed suggestive  
60 evidence of sex-dependent genetic correlation between schizophrenia and multiple sclerosis  
61 (interaction  $p=0.02$ ), with genetic risk scores for multiple sclerosis associated with greater risk of  
62 schizophrenia among males but not females. Our findings suggest that shared genetic risk  
63 factors contribute to the epidemiological co-occurrence of schizophrenia and certain immune  
64 diseases, and suggest that in some cases this genetic correlation is sex-dependent.

## 65 **Author Summary**

66 Immune diseases occur at different rates among patients with schizophrenia compared to  
67 the general population. While the reasons for this phenotypic correlation are unclear, shared  
68 genetic risk (**genetic correlation**) has been proposed as a contributing factor. Prior studies  
69 have estimated the genetic correlation between schizophrenia and a handful of immune  
70 diseases, with conflicting results. Here, we performed a comprehensive cross-disorder  
71 investigation of schizophrenia and 19 immune diseases. We identified three individual genetic  
72 variants associated with both schizophrenia and immune diseases, including a variant near  
73 *EPHB4* – a gene whose protein product guides the migration of lymphocytes towards infected  
74 cells in the immune system and the migration of neuronal axons in the brain. We demonstrated  
75 significant genome-wide genetic correlation between schizophrenia and narcolepsy, primary  
76 biliary cirrhosis, psoriasis, systemic lupus erythematosus, and ulcerative colitis. Finally, we  
77 identified a potential sex-dependent pleiotropic effect between schizophrenia and multiple  
78 sclerosis. Our findings point to shared genetic risk for schizophrenia and at least a subset of  
79 immune diseases, which likely contributes to their epidemiological co-occurrence. These results  
80 raise the possibility that the same genetic variants may exert their effects on neurons or immune  
81 cells to influence the development of psychiatric and immune disorders, respectively.

## 82 Introduction

83           Despite recent advances in identifying key biomarkers and genetic loci for  
84 schizophrenia, its pathophysiology remains poorly understood [1, 2]. One interesting  
85 epidemiological observation is that the risk of developing many immune-mediated diseases is  
86 increased among patients with schizophrenia [3–5], and vice versa [6, 7]. Here, we use the term  
87 **immune disease** to broadly encompass both autoimmune and inflammatory disorders. While  
88 there are discrepancies among studies regarding which immune diseases are most strongly  
89 correlated with schizophrenia, there is converging evidence that these diseases co-occur at a  
90 greater rate than is expected by chance [3–7]. A notable exception is rheumatoid arthritis (RA),  
91 where a consistent inverse association with schizophrenia has been observed [5, 8].

92           Genetic factors have long been proposed as an explanation for the differing prevalence  
93 of immune diseases among patients with schizophrenia compared to the general population [5,  
94 6]. The recently reported role of *complement component 4 (C4)* variation in schizophrenia [9]  
95 illustrates a potential shared genetic mechanism in the development of immune and psychiatric  
96 disorders. Genetic variants conferring increased *C4* expression protect against developing  
97 systemic lupus erythematosus (SLE), possibly by increased tagging of apoptotic cells – which  
98 are the trigger for autoantibody development in SLE – leading to more effective clearance by  
99 macrophages [10]. The same genetic mechanism may increase the risk of developing  
100 schizophrenia, by increased tagging of neuronal synapses for elimination by microglia leading to  
101 excessive synaptic pruning [9]. We hypothesize that similar shared genetic mechanisms may  
102 occur throughout the genome, with cellular manifestations in immune cells and neurons  
103 influencing the development of immune and psychiatric disorders, respectively. Previously, we  
104 found that susceptibility to schizophrenia does not appear to be driven by the broad set of loci  
105 harboring immune genes [11]. However, not all genetic variants conferring risk of immune

106 disease fall within immune loci. Here, we evaluated whether common genetic variants  
107 influencing the risk of 19 different immune diseases may also be involved in schizophrenia.

108 Our cross-disorder genetic approach is supported by recent successes in identifying  
109 shared genetic risk variants (**pleiotropy**) across a variety of human diseases [12–18]. Pleiotropy  
110 is emerging as a pervasive phenomenon in the human genome [19–21], and cross-disorder  
111 studies characterizing the nature of genotype-phenotype relationships have the potential to yield  
112 significant insights into disease etiology. For instance, cross-trait genetic analyses have shed  
113 new light on cardiovascular disease and lipid biology – and shifted attention away from HDL as  
114 a potential treatment target – by demonstrating that increased HDL cholesterol levels do not  
115 reduce the risk of myocardial infarction [14]. In psychiatry, cross-disorder analyses have  
116 identified significant pleiotropy between schizophrenia, bipolar disorder, and major depressive  
117 disorder, indicating that these diseases are not as distinct at a pathophysiological level as  
118 current diagnostic criteria suggest [12, 13, 22].

119 While previous studies have investigated genome-wide pleiotropy between  
120 schizophrenia and immune disorders, results have been inconsistent (**S1 Table**). Genetic  
121 correlation has been reported between schizophrenia and Crohn’s disease [23–27], multiple  
122 sclerosis [28], primary biliary cirrhosis [25], psoriasis [29], rheumatoid arthritis [23, 24], systemic  
123 lupus erythematosus [24, 25], and type 1 diabetes [23, 24, 26, 27] in some studies, but not in  
124 others [8, 13, 16, 24, 30]. Interestingly, negative genetic correlation (whereby genetic risk  
125 protects against developing schizophrenia) has also been reported for RA [31], in keeping with  
126 the inverse epidemiological association [5, 8].

127 Additional studies are needed to reconcile the inconsistencies in existing cross-trait  
128 analyses of schizophrenia and immune disorders, with careful attention towards potential  
129 confounding variables (e.g. population stratification, linkage disequilibrium, non-independence  
130 of genome-wide association study (GWAS) samples, and sex-specific effects). To this end we  
131 have performed a comprehensive cross-disorder analysis of schizophrenia and 19 immune

132 diseases, using data from the largest available genetic studies. Our findings add to a growing  
133 body of literature supporting pervasive pleiotropy between schizophrenia and immune diseases.  
134 We extend existing literature by including 10 immune diseases that have not previously been  
135 compared with schizophrenia, prioritizing pleiotropic genes through integrative analyses of multi-  
136 omics data, estimating how much of the phenotypic correlation between schizophrenia and  
137 immune diseases was explained by the genetic correlations we observed, and providing novel  
138 evidence for potential sex-specific pleiotropy between schizophrenia and immune disease.

## 139 **Results**

### 140 **Defining immune risk variants**

141 We identified immune-mediated diseases with robust GWAS findings using  
142 ImmunoBase (<http://www.immunobase.org>; accessed 7 June 2015), an online resource  
143 providing curated GWAS data for immune-related human diseases. These included the  
144 following 19 diseases: alopecia areata (AA), ankylosing spondylitis (AS), autoimmune thyroid  
145 disease (ATD), celiac disease (CEL), Crohn's disease (CRO), inflammatory bowel disease  
146 (IBD), juvenile idiopathic arthritis (JIA), multiple sclerosis (MS), narcolepsy (NAR), primary  
147 biliary cirrhosis (PBC), primary sclerosing cholangitis (PSC), psoriasis (PSO), rheumatoid  
148 arthritis (RA), Sjögren's syndrome (SJO), systemic lupus erythematosus (SLE), systemic  
149 sclerosis (SSC), type 1 diabetes (T1D), ulcerative colitis (UC), and vitiligo (VIT). Notably, the  
150 majority of IBD risk variants were also risk variants for CRO and/or UC. For 14 of these immune  
151 diseases (see **Table 1**), we also obtained full GWAS or Immunochip summary statistics allowing  
152 us to conduct additional polygenic risk scoring (PRS) [30, 32] and cross-trait Linkage  
153 Disequilibrium Score regression (LDSC) analyses [16].

154 Given that human leukocyte antigen (HLA) alleles within the major histocompatibility  
155 complex (MHC) region (chromosome 6: 25-34 Mb) account for a significant proportion of  
156 heritability of immune and inflammatory disorders [33], we considered HLA and non-HLA risk

157 variants separately in our analyses. Within the MHC region we considered only the most  
158 strongly associated HLA variant (including SNPs, imputed HLA amino acid sites, and classical  
159 alleles) for each disease based on univariate analysis in previously published studies (see  
160 **Table 2**), because multivariate conditional analyses reporting adjusted effect sizes of  
161 independent HLA variants were not available for all immune diseases. Outside of the MHC  
162 region, we considered all non-HLA variants curated in ImmunoBase for each of the 19 immune  
163 diseases.

164 The number of genome-wide significant non-HLA risk loci for each of the 19 immune  
165 diseases varied from three (NAR) to 144 (IBD). Several variants were associated with more  
166 than one immune disease. In total we identified 581 unique variants (563 non-HLA variants and  
167 18 HLA variants) associated with any immune disease at genome-wide significance. We refer to  
168 these variants as **immune risk variants**.

169

## 170 **Identifying pleiotropic variants implicated in both immune disease and schizophrenia**

171 First, we evaluated whether there was any evidence of overall risk allele sharing  
172 between each of the 19 immune diseases and schizophrenia using a binomial sign test. To do  
173 this, we used previously published findings from a GWAS conducted by the Schizophrenia  
174 Working Group of the Psychiatric Genomics Consortium [1, 11]. This GWAS represented a  
175 meta-analysis of 52 cohorts, comprising a total of 35,476 cases and 46,839 controls, and the full  
176 dataset is referred to here as the **PGC2 study**. Overall, the direction of effect for the sets of  
177 non-HLA SNPs associated with each of the 19 immune diseases at genome-wide significance  
178 was not shared with schizophrenia more than expected by chance (all binomial sign test  $p > 0.05$ ,  
179 **S1 Fig**). Thus, we did not observe evidence of risk allele sharing between any immune disease  
180 and schizophrenia when using a stringent genome-wide significance threshold to define immune  
181 risk variants. We also evaluated the collective association of 261 LD-independent, non-HLA  
182 immune risk variants associated with at least one of the 19 immune-mediated diseases, for



183 which linkage disequilibrium (LD) Score and minor allele frequency (MAF) information were  
184 available in the European LD Score database [16]. We found significant deviation from the  
185 theoretical null in schizophrenia for immune risk SNPs ( $\lambda=1.46$ ). However, when we compared  
186 the association of immune risk SNPs to that of similar randomly selected SNP sets  
187 (**Supplementary Methods**) we observed no evidence of enrichment (**S2 Fig**,  $p=0.66$ ),  
188 indicating that immune risk SNPs were not associated with schizophrenia more than expected  
189 by chance given the polygenic nature of schizophrenia.

190 Next, we identified potential pleiotropic variants by evaluating the association of  
191 individual immune risk variants with schizophrenia. We considered SNPs associated with  
192 schizophrenia at  $p < 8.6 \times 10^{-5}$  (Bonferroni correction for 581 tests, 563 non-HLA and 18 HLA  
193 variants) to have pleiotropic effects. Given the size of the schizophrenia GWAS, we had over  
194 80% power to detect pleiotropic SNPs assuming an  $OR \geq 1.12$  in schizophrenia.

195 Within the MHC region, we observed four HLA risk alleles associated with both immune  
196 disease and schizophrenia, particularly in the class II HLA region (**Table 2, S3 Fig**). These HLA  
197 risk alleles were the strongest MHC region associations for AA (HLA-DRB1 #37 Asn), CEL  
198 (HLA-DQB1 #74 Ala), PSC (HLA-B\*08:01), and SJO (HLA-DQB1\*02:01). The presence of HLA-  
199 DRB1 #37 Asn conferred a protective association in both AA and schizophrenia, but the  
200 remaining HLA variants showed the opposite direction of effect in schizophrenia compared to  
201 immune disease (**Table 2, S3 Fig**). Notably, none of these four HLA variants were significantly  
202 associated with schizophrenia in previous conditional analyses [9, 11], suggesting that their  
203 association with schizophrenia may be driven by LD with other causal variants in the region  
204 rather than true pleiotropy. Thus, we did not focus additional analyses on these variants.

205 Outside of the MHC region, five immune risk variants showed potential pleiotropic  
206 effects, with the risk allele for immune disease also conferring risk for schizophrenia. These  
207 variants have been previously implicated in CRO (rs6738825, rs13126505, rs1734907 [34, 35]),  
208 MS (rs7132277 [36]), and CEL (rs296547 [37]). To evaluate the pleiotropic potential of these



209 non-HLA variants, we used conditional and joint analysis (COJO) [38] to perform association  
210 analyses in the PGC2 schizophrenia GWAS conditioning on each of the five immune risk  
211 variants (**S4 Fig**). In the setting of true pleiotropy, no significant associations should remain after  
212 conditioning on the immune risk variants (statistically, all  $p > 8.6 \times 10^{-5}$ ). Consistent with pleiotropy,  
213 we observed no remaining associations with schizophrenia after conditioning on rs296547 (top  
214 SNP after conditioning: rs111530734,  $p = 1.19 \times 10^{-3}$ ), rs1734907 (top SNP after conditioning:  
215 rs11768688,  $p = 9.79 \times 10^{-4}$ ), and rs13126505 (top SNP after conditioning: rs112786981,  
216  $p = 4.58 \times 10^{-4}$ ). Significant associations with schizophrenia remained after conditioning on  
217 rs6738825 (top SNP after conditioning: rs111744017,  $p = 8.03 \times 10^{-6}$ ) and rs7132277 (top SNP  
218 after conditioning: rs74240770,  $p = 1.37 \times 10^{-8}$ ), suggesting there were independent causal  
219 variants driving the associations in these regions for schizophrenia and immune disorders.

220 In order to prioritize genes underlying the identified pleiotropic SNPs (rs296547,  
221 rs1734907, rs13126505), we performed an integrative analysis of GWAS summary statistics  
222 with methylation quantitative trait loci (mQTL) and expression quantitative trait loci (eQTL)  
223 studies using SMR and HEIDI [39, 40] (**Materials and Methods**). Notably, rs296547 was not  
224 genotyped in the eQTL dataset, and we used rs404339 as a proxy SNP ( $r^2 = 0.85$  in 1000  
225 Genomes Phase 3 CEU Population [41]) in SMR analyses of gene expression analyses for  
226 rs296547. We observed that rs1734907 was an mQTL ( $\beta = 0.47$ ,  $P = 2.13 \times 10^{-26}$ ) and eQTL ( $\beta =$   
227  $-0.24$ ,  $P = 3.54 \times 10^{-10}$ ) for *EPHB4* in peripheral blood (**S2 Table, Fig 1**). Furthermore, we  
228 observed consistent pleiotropic associations for rs1734907 with schizophrenia and *EPHB4*  
229 DNAm ( $\beta_{\text{SMR}} = -0.14$ ,  $P_{\text{SMR}} = 3.58 \times 10^{-5}$ ,  $P_{\text{HEIDI}} = 0.12$ ), schizophrenia and *EPHB4* expression  
230 ( $\beta_{\text{SMR}} = -0.28$ ,  $P_{\text{SMR}} = 2.63 \times 10^{-4}$ ,  $P_{\text{HEIDI}} = 0.17$ ), and *EPHB4* DNAm and *EPHB4* expression ( $\beta_{\text{SMR}}$   
231  $= 1.98$ ,  $P_{\text{SMR}} = 6.56 \times 10^{-8}$ ,  $P_{\text{HEIDI}} = 0.011$ ). Thus, there was consistent association across  
232 molecular phenotypes and schizophrenia at the *EPHB4* locus, suggesting this gene may be  
233 driving the association of rs1734907 in schizophrenia (**Fig 1**). Notably, *TRIP6* is also a candidate

234 functional gene underlying the association of rs1734907 with schizophrenia. We observed  
235 pleiotropic association for rs1734907 with schizophrenia and *TRIP6* DNAm with inconsistent  
236 direction of effect ( $\beta_{\text{SMR}} = 0.15$ ,  $P_{\text{SMR}} = 5.00 \times 10^{-5}$ ,  $P_{\text{HEIDI}} = 0.17$  for probe cg18683606;  $\beta_{\text{SMR}} = -$   
237  $0.12$ ,  $P_{\text{SMR}} = 2.32 \times 10^{-5}$ ,  $P_{\text{HEIDI}} = 0.18$  for probe cg27396824), a trend for association with  
238 schizophrenia and *TRIP6* expression ( $\beta_{\text{SMR}} = -0.33$ ,  $P_{\text{SMR}} = 6.38 \times 10^{-4}$ ,  $P_{\text{HEIDI}} = 0.14$ ), but no  
239 significant association with *TRIP6* DNAm and *TRIP6* expression. The other pleiotropic SNPs  
240 (rs296547, rs13126505) did not demonstrate consistent localization to a particular gene across  
241 traits and molecular phenotypes (**Table 3, S2 Table**). We observed that rs296547 was an  
242 mQTL for *C1orf106* ( $\beta = -1.04$ ,  $P < 10^{-30}$ ), and found pleiotropic associations for rs296547 with  
243 schizophrenia and *C1orf106* DNAm but no other phenotypes (**Table 3, S2 Table**). Similarly, we  
244 observed that rs13126505 was an mQTL ( $\beta = 0.49$ ,  $P = 4.03 \times 10^{-16}$ ) and eQTL ( $\beta = -0.27$ ,  $P =$   
245  $3.54 \times 10^{-10}$ ) for *SLC39A8*, and found pleiotropic associations for rs13126505 with schizophrenia  
246 and *SLC39A8* DNAm along with schizophrenia and *SLC39A8* expression, but not *SLC39A8*  
247 DNAm and expression (**Table 3, S2 Table**).

248

## 249 **Detecting genetic correlations between immune disease and schizophrenia**

250 Our immune risk variant set captured only those variants associated with immune  
251 diseases at genome-wide significance in current GWASs. Given the polygenicity of immune-  
252 related diseases, there are 100s to 1,000s of additional variants associated with each disease  
253 which have not yet been identified [42]. To evaluate sharing of risk alleles between immune  
254 diseases and schizophrenia using a broader set of variants, we used PRS [30, 32] and LDSC  
255 [16].

256 For each of the 14 immune diseases with available genome-wide summary statistics, we  
257 constructed genetic risk scores (GRSs) at a range of p-value thresholds ( $p_T$ ) as in previous  
258 studies [12], and tested for the association of these GRSs with schizophrenia in a refined subset

259 of the PGC2 study (17,000 cases and 20,655 controls) which excluded samples shared with the  
260 immune disease GWASs. To benchmark our findings in immune diseases, we also analyzed  
261 human height [43] and included previously published PRS results for bipolar disorder [12]. We  
262 considered immune diseases with PRS  $p < 0.002$  at any  $p_T$  to show significant genetic overlap  
263 with schizophrenia (Bonferroni correction for 14 immune diseases tested in both sexes,  
264  $0.05/(14 \times 2) \approx 0.002$ ). Commonly used goodness-of-fit estimates obtained from PRS (such as  
265  $\beta_{GRS}$  and Nagelkerke's pseudo- $R^2$ ) lack meaningful interpretation, which makes it difficult to  
266 compare these estimates across studies [44]. For these reasons we chose to interpret the  
267 direction of effect (i.e. positive or negative correlation) obtained from  $\beta_{GRS}$ , but not to interpret or  
268 compare the degree of genetic sharing between immune diseases and schizophrenia. For  
269 further details of our PRS approach, see **Materials and Methods**. Using PRS, we had over  
270 80% power to detect genetic covariance with schizophrenia ranging from 0.02 to 0.03 for most  
271 of the immune diseases, although some showed less than 80% power in this range (PSO, SLE,  
272 VIT; **S5 Fig**).

273 As previously described, bipolar disorder PRSs were significantly associated with  
274 schizophrenia ( $p < 1 \times 10^{-50}$  at  $p_T < 1$ ) [12]. Surprisingly, human height PRSs were also significantly  
275 associated with schizophrenia ( $p = 1 \times 10^{-11}$  at  $p_T < 1$ , **S3 Table**). Height was analyzed as a  
276 negative control based on its previously reported lack of genetic correlation with schizophrenia  
277 using LDSC [16]. Using PRS, we observed that genetic liability for increased height protected  
278 against schizophrenia ( $\beta_{GRS} = -0.11$  at  $p_T < 1$ ). The significant inverse association of height PRSs  
279 with schizophrenia case-status we observed may reflect the greater sensitivity of this approach  
280 to subtle population stratification, sample sharing, and/or true genetic overlap.

281 Genetic scores including the HLA region were significant for CEL, NAR, PBC, PSO, RA,  
282 SLE, SSC, T1D, and UC ( $p < 0.002$  at multiple  $p_T$ , **S4 Table**). Height was not included in these  
283 analyses, given that HLA variants have not been associated with height in previous GWAS [43].

284 With the exception of CEL ( $\beta_{\text{GRS}} \approx -0.04$  at  $p_T < 5 \times 10^{-8}$ ,  $1 \times 10^{-4}$ , and  $1 \times 10^{-3}$ ), all immune diseases  
285 exhibited a positively associated PRS with schizophrenia case-status (all  $\beta_{\text{GRS}} > 0$ , **S4 Table**). For  
286 CEL, RA, SLE, and SSC only those PRSs constructed using the most stringent p-value cutoffs  
287 ( $5 \times 10^{-8}$ ,  $1 \times 10^{-4}$ ,  $1 \times 10^{-3}$ ) were significantly associated with schizophrenia. To evaluate whether  
288 the HLA region alone was driving the observed genetic sharing, we constructed PRSs excluding  
289 this region. After excluding HLA variants, genetic scores for NAR, PBC, PSO, SLE, T1D, and  
290 UC remained significantly associated with schizophrenia (**Table 4, S6 Fig**). Because the genetic  
291 overlap between these six immune diseases and schizophrenia was not driven by a single HLA  
292 variant of large effect, we focused on these findings for the remainder of our analyses.

293         Given the potential sensitivity of PRS to artificial genetic overlap highlighted in our  
294 analysis of height, we wanted to assess whether cryptic sample sharing between the immune  
295 and schizophrenia GWASs could be driving the shared genetic liability that we observed. To do  
296 this, we conducted leave-half-out analyses. If the observed genetic overlap was driven by  
297 samples shared between certain schizophrenia cohorts and the immune disease GWASs, the  
298 GRS association should not be consistently observed across subsamples leaving out half of the  
299 schizophrenia cohorts. Across 1,000 subsamples ( $N_{\text{cases}}$  ranging from 3,985-13,074) leaving out  
300 a randomly selected 14 cohorts, we observed a high proportion of subsamples with GRSs  
301 significantly associated with schizophrenia ( $p < 0.05$  at  $p_T < 1$ ) for height (0.99), NAR (0.72), PBC  
302 (0.95), PSO (0.84), SLE (0.97), T1D (0.95), and UC (0.70) suggesting our findings were not  
303 driven by sample sharing.

304         To further validate our finding of genetic overlap between schizophrenia and these six  
305 immune-mediated diseases using PRS, we applied an independent method (LDSC) for  
306 estimating genome-wide genetic correlation between traits that is robust to sample sharing [16].  
307 For LDSC analyses, we used summary statistics from the 49 European-ancestry cohorts in the  
308 PGC2 study (31,335 cases and 38,765 controls) [1]. Unlike PRS, LDSC provides an

309 interpretable and comparable estimation of genetic sharing between two traits in the form of  
310 genetic correlation ( $r_g$ ) values. Notably, LDSC is less sensitive than PRS and is not robust when  
311 applied to genetic data obtained from specialty chips (e.g. ImmunoChip) [16]. We did not carry  
312 T1D forward for LDSC analysis, due to failure of this dataset on quality control measures  
313 (liability scale  $h^2 > 1$ , likely secondary to inflated effective sample size due to genotyping on  
314 ImmunoChip). Given that this was a secondary analysis, we considered immune diseases with  $r_g$   
315  $p < 0.05$  to show significant genetic overlap with schizophrenia.

316 As previously reported [16], our positive control (bipolar disorder) showed significant  
317 genetic overlap with schizophrenia ( $r_g = 0.75 \pm 0.05$ ,  $p = 8.5 \times 10^{-60}$ ; **Fig 2, Table 4**). In contrast to our  
318 PRS results, but in agreement with previous findings [16], our negative control (height) showed  
319 no such overlap using LDSC ( $r_g = -0.004 \pm 0.02$ ,  $p = 0.84$ ; **Fig 2, Table 4**). With respect to immune  
320 diseases, LDSC confirmed significant genetic overlap with schizophrenia for PBC, PSO, SLE,  
321 and UC ( $r_g = 0.10-0.18$ , **Fig 2, Table 4**) indicating the association of GRSs for these diseases  
322 was not driven by shared samples. Notably, genetic correlations for PSO and SLE did not  
323 survive correction for the 14 tests performed (**Table 4**). We also observed significant genetic  
324 overlap with schizophrenia for NAR using LDSC, with the caveat that this dataset was  
325 genotyped using ImmunoChip and did not survive multiple testing correction (**Fig 2, Table 4**).  
326 Overall, LDSC provided consistent results for the immune diseases showing significant genetic  
327 sharing with schizophrenia by PRS.

328

### 329 **Benchmarking genetic correlations between immune disease and schizophrenia with** 330 **epidemiological data**

331 To determine how much of the phenotypic correlation between schizophrenia and  
332 immune-mediated diseases was explained by the genetic correlations we observed, we  
333 benchmarked significant genetic correlations between schizophrenia and immune-mediated

334 disorders relative to the expected phenotypic correlations from epidemiological data (**Materials**  
335 **and Methods**). Using incidence of immune diseases in schizophrenia reported in a large  
336 population-based study [3], we estimated phenotypic correlations between schizophrenia and  
337 PBC, PSO, SLE, and UC. We were unable to estimate phenotypic correlation for NAR and  
338 schizophrenia, given that there were no estimates in the literature of the incidence of NAR in  
339 schizophrenia. For PBC, PSO, and SLE we observed small positive genetic correlations with  
340 schizophrenia that were consistent with the epidemiological data (PBC:  $r_g = 0.131 \pm 0.05$ ,  $r_p =$   
341  $0.112$ ; PSO:  $r_g = 0.182 \pm 0.07$ ,  $r_p = 0.130$ ; SLE:  $r_g = 0.130 \pm 0.05$ ,  $r_p = 0.048$ ). For UC we  
342 observed a small positive estimate of genetic correlation ( $r_g = 0.106 \pm 0.04$ ) while there was no  
343 strong evidence for any correlation between UC and schizophrenia in the epidemiological data  
344 ( $r_p = -0.001$ ). Importantly, while the MHC region contains risk factors for both schizophrenia and  
345 immune-mediated diseases, our genetic correlation estimates were obtained considering only  
346 SNPs outside of the MHC region due to unusual LD in this region [45].

347

### 348 **Exploring sex-dependent genetic correlations between immune disease and** 349 **schizophrenia**

350         Given the significant sex bias of autoimmune diseases, with women at greater risk  
351 overall [46], we hypothesized that there may be sex-dependent genetic overlap between  
352 schizophrenia and some immune-mediated diseases. We therefore performed sex-stratified  
353 PRS, testing the association of height and immune disease GRSs with schizophrenia separately  
354 in males and females of the PGC2 study. Genetic scores for height showed significant  
355 association with schizophrenia in both males and females. Three of the immune diseases (PBC,  
356 PSO, T1D) with significant main effects showed sex-dependent effects, with greater signal  
357 among males (**S5 Table**). Additionally, although genetic scores for MS were not significantly

358 associated with schizophrenia in the total sample there was significant association among  
359 males ( $R^2=0.03$ ,  $p=1.26 \times 10^{-3}$  at  $p_T < 1$ ; **S5 Table**).

360         Given the greater statistical power for the male subset of the schizophrenia GWAS, we  
361 performed simulations by selecting random subsamples of male cases and controls equal in  
362 size to the female sample (5,321 cases and 9,094 controls). If the stronger genetic overlap  
363 between schizophrenia and MS, PBC, PSO, and T1D among males was driven by the larger  
364 sample size rather than a true sex-dependent effect, there should be no consistent association  
365 of GRSs with schizophrenia in these subsamples. Across 1,000 subsamples, the proportion with  
366 significant GRSs ( $p < 0.002$  at  $p_T < 1$ ) was high for PBC (0.94) and T1D (0.87), suggesting our  
367 finding of a greater pleiotropic effect among males for these diseases was not driven solely by  
368 lower statistical power among females; this was not the case for PSO (0.59) or MS (0.21).

369         Next, we performed formal statistical tests for an interaction between sex and genetic  
370 scores for these four immune diseases. We observed a nominally significant interaction for MS  
371 ( $p < 0.05$  at several  $p_T$ ; **S5 Table**), noting that this finding did not survive correction for multiple  
372 testing. The remaining immune diseases did not show significant sex interactions, although the  
373 direction of effect was consistent with a greater pleiotropic effect in males (**S5 Table**).

374

## 375 **Discussion**

376         Using a variety of statistical approaches, we provide evidence of shared genetic risk for  
377 schizophrenia and several immune diseases. Within the MHC region, we identified four HLA  
378 variants showing statistically significant association with schizophrenia. An important caveat is  
379 that these four variants were not the top variants in their respective regions of association with  
380 schizophrenia, and were not primary drivers of the MHC association in schizophrenia in  
381 stepwise conditional analyses [9]. Therefore, the biological significance of these particular HLA  
382 variants in schizophrenia is likely limited.



383           Outside of the MHC region, we identified three SNPs with pleiotropic effects - influencing  
384 risk for both celiac disease (CEL) (rs296547) or Crohn's disease (CRO) (rs1734907,  
385 rs13126505) and schizophrenia. Integration of GWAS, mQTL, and eQTL data implicated  
386 *C1orf106*, *SLC39A8*, and *EPHB4* or *TRIP6* as functional candidates driving the pleiotropic  
387 association of rs296547, rs13126505, and rs1734907, respectively. Overall, our findings provide  
388 the strongest evidence for a model in which genetic variation at rs1734907 (~85kb upstream of  
389 *EPHB4*) increases DNA methylation, upregulates *EPHB4* expression, and decreases the risk of  
390 schizophrenia. While DNA methylation is classically associated with gene silencing, the effect of  
391 methylation on transcription depends on the genomic context [47]; for instance, methylation of  
392 silencers or insulators eliminates transcription-blocking activity thereby promoting gene  
393 expression [48, 49]. *EPHB4* is a transmembrane tyrosine kinase receptor that coordinates cell  
394 movement via bidirectional intercellular signaling at sites of direct cell-to-cell contact [50]. In the  
395 brain, ephrin signaling mediates synaptic plasticity by initiating and stabilizing neuronal synapse  
396 formation (reviewed by [51]). An analogous role has not yet been discovered in the immune  
397 system, possibly due to the much shorter lifespan of immunological synapses between  
398 lymphocytes and antigen presenting cells (minutes) as compared to neuronal synapses (years)  
399 [52, 53]. Interestingly, ephrin signaling attenuates the migration responses of both neurons and  
400 immune cells toward chemoattractants *in vitro* [54, 55]. Thus, disrupted pathfinding may be a  
401 shared risk mechanism by which *EPHB4* contributes to immune disease and schizophrenia. The  
402 hypotheses raised by our findings require further validation. If the association of rs1734907 with  
403 CRO and schizophrenia is robustly replicated in future GWASs, functional studies will be  
404 needed to investigate both the genetic mechanism by which rs1734907 (or a causal variant in  
405 LD with this SNP) influences *EPHB4* transcription, and the biological mechanism by which  
406 increased *EPHB4* expression influences susceptibility to CRO and schizophrenia. With the  
407 multi-kinase inhibitor dasatinib already on the market for treatment of chronic myeloid leukemia

408 [56] and other EphB4 inhibitors currently in Phase II trials [57–60], the potential for future drug  
409 repurposing makes *EPHB4* an attractive candidate for further investigation.

410 We observed genome-wide sharing of risk variants for schizophrenia and six immune  
411 diseases (narcolepsy (NAR), primary biliary cirrhosis (PBC), psoriasis (PSO), systemic lupus  
412 erythematosus (SLE), type 1 diabetes (T1D), and ulcerative colitis (UC)) using PRS, all of which  
413 have been previously reported to co-occur with schizophrenia in epidemiological studies [3, 5,  
414 61]. The strongest evidence of shared genetic risk emerged for PBC, PSO, SLE, and UC, which  
415 also showed robust genetic correlation with schizophrenia using LDSC. With the exception of  
416 UC, the small positive genetic correlations observed between these immune diseases and  
417 schizophrenia ( $r_g \sim 0.1$ ) were consistent with phenotypic correlations observed in  
418 epidemiological data. Thus, currently available genetic data suggest that shared genetic risk  
419 contributes to the co-occurrence of PBC, PSO, and SLE in schizophrenia. Possible explanations  
420 for this sharing of genetic risk include the presence of a subgroup of “autoimmune-like”  
421 schizophrenia cases and/or sharing of specific biological pathways between schizophrenia and  
422 these particular immune diseases.

423 To our knowledge, this is the first time that sex-dependent genetic correlation with  
424 immune diseases has been investigated in schizophrenia. We found nominal evidence of male-  
425 specific genetic correlation for multiple sclerosis (MS), and a stronger pleiotropic effect among  
426 males for PBC, PSO, and T1D although the latter were not statistically significant. Interestingly,  
427 animal studies indicate that sex hormones have opposing effects on predisposition to  
428 schizophrenia and autoimmunity; estrogen has been reported to protect against the  
429 development of schizophrenia [62], while androgens appear to protect against the development  
430 autoimmune diseases [63, 64]. We emphasize that our sex-dependent findings require  
431 validation in independent samples. If replicated, one possibility is that sex hormones modulate  
432 pathogenesis among genetically vulnerable individuals, making males more likely to develop  
433 schizophrenia and females more likely to develop autoimmune diseases.

434 Our work was subject to several important limitations. Firstly, genome-wide summary  
435 statistics were not available for all of the immune diseases, resulting in a more limited analysis  
436 of 14 diseases. For five of these diseases (CEL, juvenile idiopathic arthritis (JIA), MS, NAR,  
437 T1D) summary statistics were obtained from ImmunoChip rather than GWAS, providing  
438 incomplete coverage of the genome for comparison with schizophrenia and biasing the genetic  
439 correlation estimates obtained by LDSC. Secondly, GRSs for human height – analyzed as a  
440 negative control – showed stronger association with schizophrenia than any of the immune  
441 diseases. An inverse epidemiological relationship between height and schizophrenia has been  
442 reported [65, 66], consistent with our PRS findings. The reasons for the discrepancy between  
443 PRS and LDSC, which showed no genetic correlation between height and schizophrenia (as  
444 previously reported [16]) are unclear. One explanation is that PRS, which uses individual-level  
445 genotype data as opposed to summary statistics, is a more sensitive method to detect true  
446 genome-wide sharing of risk alleles. If this is the case, it raises a broader question regarding  
447 how much genetic overlap is expected across complex traits in general using the PRS  
448 approach. Recent work suggests that pleiotropy is pervasive across human diseases, and that  
449 this phenomenon is driven at least in part by the polygenic nature of complex traits [21]. If this is  
450 the case, the extreme polygenicity of human height (more than 100,000 common variants  
451 estimated to exert independent causal effects [67]) may be driving the pleiotropy we observed  
452 between height and schizophrenia using PRS. An alternative explanation that must be  
453 considered is that PRS may be more vulnerable to confounding by cryptic population  
454 stratification, LD, or sample sharing.

455 Despite these limitations, our work adds to a growing body of evidence suggesting that  
456 schizophrenia and immune diseases share genetic risk factors. There are conflicting reports in  
457 the literature with respect to the specific immune diseases demonstrating genetic overlap with  
458 schizophrenia, and the direction of effect (positive or negative genetic correlation). Genetic  
459 overlap with schizophrenia has been previously investigated for nine of the 19 immune diseases

460 studied here. Genome-wide genetic correlation with schizophrenia has been previously reported  
461 for CRO [23–25, 27], MS [28], PBC [25], PSO [25, 29], rheumatoid arthritis (RA, both positive  
462 [23, 24] and negative [31] genetic correlations), SLE [24, 25], T1D [23], and UC [24–27] (see **S1**  
463 **Table** for a summary of previous studies). Our results are consistent with previously reported  
464 genetic overlap between schizophrenia and PBC [25], PSO [25], SLE [24, 25], T1D [23], and UC  
465 [24, 25]. While we did not observe genetic correlation between schizophrenia and MS in the  
466 total sample, there was a significant sex-dependent effect with genetic correlation observed  
467 among males. We provide new evidence of genetic correlation with NAR (not previously  
468 investigated). Notably, we did not find any significant genetic correlation between schizophrenia  
469 and RA. Despite the robust inverse epidemiological association between schizophrenia and RA  
470 [8], the genetic association is less consistent. Using methods based on summary statistics  
471 (including PRS and LDSC), four previous studies reported no evidence of pleiotropy between  
472 schizophrenia and RA [8, 16, 25, 30], while two studies reported positive genetic correlation [23,  
473 24]. Notably, Lee *et al.* reported an inverse genetic correlation – in keeping with the observed  
474 epidemiological effect – using restricted maximum likelihood (GREML), a method utilizing full  
475 genotype data which has greater statistical power to detect small pleiotropic effects than PRS or  
476 LDSC [31]. Given the modest and potentially sex-dependent genetic correlations observed in  
477 the present study, subtle differences in statistical power across studies using different statistical  
478 methods and GWAS datasets may explain these discrepant findings. As genetic samples  
479 continue to grow, and our understanding of the degree of genetic overlap expected among  
480 complex traits evolves, it will be worthwhile to revisit these analyses.

481 Overall, our analyses provide statistical evidence supporting extensive pleiotropy  
482 between immune diseases and schizophrenia. Our results highlight *EPHB4*, a transmembrane  
483 receptor that coordinates cell migration and has dual roles in immune cell and neuronal  
484 pathfinding, as a promising candidate for future functional studies. More broadly, our findings  
485 indicate that common genetic variants influencing the risk of immune diseases – in particular

486 NAR, PBC, PSO, SLE, and UC – are also involved in schizophrenia. Studies identifying the cell  
487 types and biological pathways that may be driving this genetic overlap are needed, and will  
488 hopefully provide further insights into the pathophysiology of schizophrenia. In the meantime,  
489 our work supports the emerging hypothesis that pathogenic mechanisms are shared across  
490 immune and central nervous system disorders.

491

## 492 **Materials and Methods**

### 493 **Samples and quality control**

494 We used either imputed genotype data or summary statistics generated as described in  
495 the original GWASs. For sample details, see **Table 1**.

496

### 497 **Schizophrenia dataset**

498 We used data from the PGC2 study [1]. For analyses of non-HLA genome-wide  
499 significant risk variants for immune diseases we used publicly available summary statistics from  
500 the total dataset (52 cohorts; 35,476 cases and 46,839 controls) [1]. For PRS analyses we used  
501 all 36 European ancestry case-control cohorts with available individual-level genotype data  
502 (25,629 cases and 30,976 controls). For analyses including HLA variants we used a further  
503 refined 31 European ancestry case-control cohorts (20,253 cases and 25,011 controls) with  
504 high-quality coverage of the MHC region, as previously described [11].

505

### 506 **Immune disease datasets**

507 To estimate the extent of genetic overlap between schizophrenia and immune diseases,  
508 we obtained full GWAS or Immunochip summary statistics for 14 of the 19 immune diseases  
509 (five immune diseases were not included in PRS analyses due to lack of available summary  
510 statistics). We obtained publicly available summary statistics for ten immune diseases (see

511 **URLs):** CEL [68], CRO [69], IBD [69], JIA [70], MS [36], NAR [71], RA [72], SLE [73], T1D  
512 [74], and UC [69]. For the following four immune diseases, we obtained summary statistics with  
513 permission from the authors: PBC [75], PSO [76], SSC [77], and VIT [78].

514

## 515 **Testing the association of genome-wide significant risk alleles for 19 immune** 516 **diseases in schizophrenia**

517 For each of the 19 immune diseases, we defined risk loci outside of the MHC region  
518 (chromosome 6: 25-34 Mb) using curated GWAS results from ImmunoBase  
519 (<http://www.immunobase.org>; accessed 7 June 2015. For details, see **Supplementary**  
520 **Methods**). Notably, the majority of IBD risk variants were also risk variants for CRO and/or UC.  
521 Within the MHC region we considered only the most strongly associated HLA variant (including  
522 SNPs, imputed HLA amino acid sites, and classical alleles) for each disease based on  
523 univariate analysis in previously published studies (see **Table 2**), because multivariate  
524 conditional analyses reporting adjusted effect sizes of independent HLA variants were not  
525 available for all immune diseases. In total there were 581 unique variants (563 non-HLA  
526 variants and 18 HLA variants) associated with any immune disease at genome-wide  
527 significance.

528 First, we tested for shared direction of effect with schizophrenia among SNPs associated  
529 with each of the 19 immune diseases using the binomial sign test. Because some immune risk  
530 SNPs were associated with multiple diseases with inconsistent direction of effect, we could not  
531 evaluate shared direction of effect among the collective set of immune risk SNPs in  
532 schizophrenia.

533 Next, we evaluated the collective association of SNPs associated with any immune  
534 disease. First we extracted the p-values for a pruned set of 261 LD-independent, non-HLA  
535 immune risk SNPs with linkage disequilibrium (LD) Score and minor allele frequency (MAF)

536 information were available in the European LD Score database [16] from the schizophrenia  
537 PGC2 GWAS. We then quantified enrichment of these immune risk SNP associations in  
538 schizophrenia using the genomic inflation value  $\lambda$ . We obtained an empirical enrichment p-value  
539 by comparing this to  $\lambda$  values from 1,000 equal-sized sets of SNPs drawn from the  
540 schizophrenia GWAS summary data, and matched to the immune SNP set for MAF and LD  
541 score as these parameters are correlated with GWAS test statistics (see **Supplementary**  
542 **Methods** for details).

543 Finally, we evaluated the association of each of the 581 variants with schizophrenia  
544 using previously published association results for non-HLA [1] and HLA variants [11]. We  
545 considered SNPs associated with schizophrenia at  $p < 8.6 \times 10^{-5}$  (Bonferroni correction for 581  
546 tests, 563 non-HLA and 18 HLA variants) to have pleiotropic effects.

547 To evaluate the pleiotropic potential of immune risk variants significantly associated with  
548 schizophrenia, we performed conditional and joint analysis (COJO) using GCTA [79].  
549 Specifically, we used COJO to perform association analyses in the PGC2 schizophrenia GWAS  
550 conditioning on the immune risk variants of interest (i.e. SNPs that were significantly associated  
551 with both an immune disease and schizophrenia). In the setting of true pleiotropy, no significant  
552 associations with schizophrenia should remain after conditioning on these immune risk variants  
553 (statistically, all  $p > 8.6 \times 10^{-5}$ ). We used the 1000 Genomes Phase 3 European dataset as a  
554 reference panel to calculate LD between SNPs.

555 To prioritize genes and regulatory elements driving the pleiotropic GWAS loci we  
556 identified (associated with both immune disease and schizophrenia, see **Table 3**), we followed  
557 the analytic approach described by Wu *et al.* [40]. This approach integrates summary statistics  
558 from independent -omics methylation quantitative trait loci (mQTL) studies, expression  
559 quantitative trait loci (eQTL) studies, and GWAS to identify SNPs associated with gene  
560 expression, DNA methylation, and disease through shared genetic effects.



561 We obtained mQTL and eQTL data used in Wu *et al.* [40] for genetic regions within a  
562 2Mb window of each pleiotropic SNP. These data and the quality control measures applied have  
563 been described in detail elsewhere [40]. Briefly, mQTL summary-level SNP data were from a  
564 meta-analysis of the Brisbane Systems Genetics Study [80] and Lothian Birth Cohorts of 1921  
565 and 1936 [81], which comprised 1,980 individuals with DNA methylation measured in peripheral  
566 blood. eQTL summary-level SNP data were from the Consortium for the Architecture of Gene  
567 Expression (CAGE) study [82], which comprised 2,765 individuals with gene expression levels  
568 measured in peripheral blood. GWAS summary-level SNP data for schizophrenia was from the  
569 PGC2 study [1].

570 We applied summary data-based Mendelian randomization (SMR) using GCTA [79] to  
571 test for shared associations between the pleiotropic SNPs with DNAm probes and gene  
572 expression probes, DNAm probes and schizophrenia, and gene expression probes and  
573 schizophrenia. We included DNAm and gene expression probes within 2Mb of the pleiotropic  
574 SNPs. We considered significant associations as those with  $P_{\text{SMR}} < 1.30 \times 10^{-4}$  (0.05/385 tagged  
575 genes) for mQTLs and  $P_{\text{SMR}} < 4.31 \times 10^{-4}$  for eQTLs (0.05/116 tagged genes). Next, we applied  
576 the heterogeneity in dependent instruments (HEIDI) test [39] using GCTA [79] to evaluate  
577 whether significant shared associations between DNAm, gene expression and schizophrenia  
578 were driven by linkage (i.e. separate causal variants in LD exerting genetic effects on DNAm,  
579 gene expression, and schizophrenia) or a shared pleiotropic causal variant. We considered  
580 genetic effects that passed the HEIDI test ( $P_{\text{HEIDI}} > 0.01$ ) to be driven by a single causal variant.  
581 We looked for consistent SMR and HEIDI results across GWAS, mQTL, and eQTL studies to  
582 prioritize genes for future functional studies.

583

584 **Testing the association of polygenic risk scores for 14 immune diseases in**  
585 **schizophrenia**

586 To evaluate whether common variants influencing risk of immune diseases collectively  
587 contribute to schizophrenia, we used PRS [30, 32]. To benchmark the amount of genetic  
588 overlap between schizophrenia and immune disease, we included previously published results  
589 for bipolar disorder as a positive control [12]. We used human height [43] as a negative control  
590 because – despite the inverse epidemiological relationship between height and schizophrenia  
591 previously reported [65, 66] – a prior study using cross-trait LDSC reported no genetic  
592 correlation with schizophrenia [16].

593 For 14 immune diseases with available genome-wide summary statistics we performed  
594 PRS at a range of p-value thresholds ( $p_T$ ) as in previous studies [12]:  $5 \times 10^{-8}$ ,  $1 \times 10^{-4}$ ,  $1 \times 10^{-3}$ ,  
595 0.01, 0.05, 0.1, 0.2, 0.3, 0.4, 0.5, and 1.0 (which included all LD-independent SNPs, **Table 1**).  
596 Due to extensive LD in the HLA region, we performed analyses both including the top HLA  
597 variant and excluding the HLA region. At each  $p_T$ , we constructed GRSs for each individual  $i$  in  
598 the schizophrenia cohort for each immune disease  $h$  by calculating the sum of risk-allele  
599 dosages ( $g$ ) weighted by their effect sizes ( $\beta$ ) for that immune disease:

$$PRS_{i,h} = \sum_M \beta_{M,h} g_{M,i}$$

600 where  $M$  iterates over all known risk alleles for disease  $h$ ,  $\beta_{M,h}$  is the effect size (log odds ratio)  
601 of  $M$  in disease  $h$ , and  $g_{M,i}$  is the risk-allele dosage of  $M$  in individual  $i$ . We then performed  
602 logistic regression in R [83] using the stats package [83] to evaluate the association between  
603 schizophrenia case-status and GRSs for each immune disease. As in previous studies,  
604 statistical significance of the GRSs was estimated based on their logistic regression coefficient  
605 [12, 30]. Variance in schizophrenia case-status explained by the GRSs was estimated using the  
606 deviation in liability-scale  $R^2$  between a null model (including 10 ancestry-informative principal  
607 components and study site) and the full model (including GRSs in addition to these covariates),  
608 calculated as previously described [44] assuming a population prevalence of schizophrenia of  
609 1%. We also estimated Nagelkerke's pseudo- $R^2$  using the fmsb package [84]. We considered

610 immune diseases with GRS  $p < 0.002$  at any  $p_T$  to show significant genetic overlap with  
611 schizophrenia (Bonferroni correction for 14 immune diseases tested in both sexes,  
612  $0.05/(14 \times 2) = 0.002$ ). As in previous studies [12, 30] we did not use Bonferroni correction for the  
613 number of p-value thresholds, as these tests are highly correlated.

614 We excluded eight schizophrenia cohorts using Wellcome Trust Case Control Consortium  
615 (WTCCC) controls, due to the use of these samples in the immune disease GWASs. The total  
616 schizophrenia sample analyzed by PRS included 37,655 subjects (28 cohorts; 17,000 cases  
617 and 20,655 controls). Sex-stratified and formal sex-PRS interaction analyses were performed  
618 among the subset of subjects with known sex (9,787 male cases and 9,284 male controls; 5,231  
619 female cases and 9,094 female controls). For details of PRS, see **Supplementary Methods**  
620 and **Table 1**.

621

## 622 **Estimating the degree of genetic correlation between schizophrenia and 14 immune** 623 **diseases**

624 To validate our PRS results and obtain genetic correlation ( $r_g$ ) estimates, we performed a  
625 secondary analysis using cross-trait LDSC for immune-mediated diseases with significant PRS  
626 associations with schizophrenia [16]. Cross-trait LDSC estimates the genetic correlation  
627 between two traits using GWAS summary statistics. Similar to the PRS analyses described  
628 above, we benchmarked the genetic correlations observed for immune diseases by analyzing  
629 bipolar disorder [85] as a positive control and human height [43] as a negative control.

630 The statistical framework for cross-trait LDSC has been described in detail previously  
631 [16]. Briefly, LDSC leverages the relationship between LD and association test statistics to  
632 estimate heritability as the slope of the regression of z-scores against LD scores [86]. Cross-trait  
633 LDSC is a bivariate extension of this method which estimates genetic covariance as the slope of  
634 the regression of the products of z-scores against LD scores using the following equation [16]:

$$E[z_{1j}z_{2j}|\ell_j] = \frac{\sqrt{N_1N_2}\rho_g}{M} \ell_j + \frac{\rho N_s}{\sqrt{N_1N_2}}$$

635 where  $z_{ij}$  denotes the z score for study  $i$  and SNP  $j$ ,  $\ell_j$  is the LD score [86],  $N_i$  is the sample size  
636 for study  $i$ ,  $\rho_g$  is the genetic covariance,  $M$  is the number of SNPs in the reference panel with  
637 MAF between 5% and 50%,  $N_s$  is the number of individuals included in both studies, and  $\rho$  is  
638 the phenotypic correlation among the  $N_s$  overlapping samples. Genetic covariance  $\rho_g$  is  
639 estimated by regressing  $z_{1j}z_{2j}$  against  $\ell_j\sqrt{N_1N_2}$ , and multiplying the resulting slope by  $M$ .  
640 Statistical significance is assessed using block jackknifing over 200 equally sized blocks of  
641 SNPs [16]. Importantly, the MHC region is excluded from LDSC analyses due to its unusual LD  
642 structure and genetic architecture [45].

643 Because LDSC is robust to sample sharing across GWAS [16], we used summary  
644 statistics from the 49 European-ancestry cohorts in the PGC2 study (31,335 cases and 38,765  
645 controls) [1]. We used LD Scores from the “eur\_w\_ld\_chr/” files available from  
646 <https://data.broadinstitute.org/alkesgroup/LDSCORE>, computed using 1000 Genomes Project  
647 [87] Europeans as a reference panel as previously described [45]. To ensure we were using  
648 well-imputed SNPS we filtered all GWAS as previously described [16], including limiting the  
649 analysis to HapMap 3 [88] SNPs as implemented in the LDSC script `munge_sumstats.py`  
650 (<https://github.com/bulik/ldsc>). We estimated liability scale  $h^2$  for each trait using previously  
651 reported prevalence estimates (**S6 Table**), and removed datasets with  $h^2 > 1$ . Given that this was  
652 a secondary analysis, we considered traits with  $r_g p < 0.05$  to have significant genetic correlation  
653 with schizophrenia.

#### 654 **Benchmarking with epidemiological data**

655 To determine how much of the phenotypic correlation between schizophrenia and  
656 immune-mediated diseases was explained by the genetic correlations we observed, we used  
657 the approach previously described by Lee *et al.* [31]. Briefly, we benchmarked our significant

658 genetic correlation estimates between schizophrenia and NAR, PBC, PSO, SLE and UC relative  
659 to the expected phenotypic correlations from epidemiological data. We obtained estimates of  
660 the population risk of schizophrenia ( $K_{SCZ}$ ), the population risk of each immune disease  
661 ( $K_{IMMUNE}$ ), and the probability of each immune disease among patients with schizophrenia  
662 ( $K_{IMMUNE | SCZ}$ ) from the literature as referenced in **S6 Table**. We estimated the phenotypic  
663 correlation between schizophrenia and the immune disease of interest ( $R_{SCZ-IMMUNE}$ ) using the  
664 following formula, as derived by Lee *et al.* [31] assuming that the phenotypic liabilities of  
665 schizophrenia ( $l_{SCZ}$ ) and immune disease ( $l_{IMMUNE}$ ) follow a bivariate normal distribution with  
666 mean=0 and standard deviation=1:

$$R_{SCZ-IMMUNE} = \frac{i_{SCZ}t_{IMMUNE} - \sqrt{i_{SCZ}^2 t_{IMMUNE}^2 - (t_{IMMUNE | SCZ}^2 + i_{SCZ}^2)(t_{IMMUNE}^2 - t_{IMMUNE | SCZ}^2)}}{(t_{IMMUNE | SCZ}^2 + i_{SCZ}^2)}$$

667 where:

668  $t_{SCZ}$  is the liability threshold for schizophrenia:

669 Z-score of the  $(1 - K_{SCZ})^{\text{th}}$  percentile

670  $t_{IMMUNE}$  is the liability threshold for immune disease:

671 Z-score of the  $(1 - K_{IMMUNE})^{\text{th}}$  percentile

672  $t_{IMMUNE | SCZ}$  is the liability threshold for immune disease in those with schizophrenia:

673 Z-score of the  $(1 - K_{IMMUNE | SCZ})^{\text{th}}$  percentile

674  $d_{SCZ}$  is the “height” of the normal distribution at the schizophrenia liability threshold:

675 probability density function of  $t_{SCZ}$

676  $i_{SCZ}$  is the mean phenotypic liability of those with schizophrenia:

677  $d_{SCZ} / K_{SCZ}$

## 678 **Statistical power**

679 Power to detect association of individual non-HLA and HLA immune risk variants in

680 schizophrenia was calculated using the Genetic Power Calculator [89] assuming a risk allele

681 frequency (RAF) of 0.05, disease prevalence of 1%, and significance threshold ( $\alpha$ ) of  $8.6 \times 10^{-5}$ .  
682 Power for PRS was evaluated using AVENGEME [90, 91], assuming disease and genetic  
683 parameters detailed in **S6 Table**.

## 684 **URLs**

685 LD Score database:

686 [ftp://atguftp.mgh.harvard.edu/brendan/1k\\_eur\\_r2\\_hm3snps\\_se\\_weights.RDS](ftp://atguftp.mgh.harvard.edu/brendan/1k_eur_r2_hm3snps_se_weights.RDS)

687

688 GWAS summary statistics:

689 • CEL

690 [https://www.immunobase.org/downloads/protected\\_data/iChip\\_Data/hg19\\_gwas\\_ic\\_cel\\_tr](https://www.immunobase.org/downloads/protected_data/iChip_Data/hg19_gwas_ic_cel_tr)

691 [ynka\\_4\\_19\\_1.tab.gz](#)

692 • CRO, IBD, UC

693 <ftp://ftp.sanger.ac.uk/pub/consortia/ibdgenetics/iibdgc-trans-ancestry-filtered-summary->

694 [stats.tgz](#)

695 • JIA

696 [https://www.immunobase.org/downloads/protected\\_data/iChip\\_Data/hg19\\_gwas\\_ic\\_jia\\_hin](https://www.immunobase.org/downloads/protected_data/iChip_Data/hg19_gwas_ic_jia_hin)

697 [ks\\_UK\\_4\\_19\\_1.tab.gz](#)

698 • MS

699 [https://www.immunobase.org/downloads/protected\\_data/GWAS\\_Data/hg19\\_gwas\\_ms\\_im](https://www.immunobase.org/downloads/protected_data/GWAS_Data/hg19_gwas_ms_im)

700 [sgc\\_4\\_19\\_1.tab.gz](#)

701 • NAR

702 [https://www.immunobase.org/downloads/protected\\_data/iChip\\_Data/hg19\\_gwas\\_ic\\_nar\\_fa](https://www.immunobase.org/downloads/protected_data/iChip_Data/hg19_gwas_ic_nar_fa)

703 [raco\\_4\\_19\\_1.tab.gz](#)

704 • RA

705 [http://www.broadinstitute.org/ftp/pub/rheumatoid\\_arthritis/Stahl\\_etal\\_2010NG/](http://www.broadinstitute.org/ftp/pub/rheumatoid_arthritis/Stahl_etal_2010NG/)

706 • SLE

707 [https://www.immunobase.org/downloads/protected\\_data/GWAS\\_Data/hg19\\_gwas\\_sle\\_be](https://www.immunobase.org/downloads/protected_data/GWAS_Data/hg19_gwas_sle_be)

708 [ntham\\_4\\_20\\_0.tab.gz](#)



- 709 • T1D
- 710 [https://www.immunobase.org/downloads/protected\\_data/iChip\\_Data/hg19\\_gwas\\_ic\\_t1d\\_o](https://www.immunobase.org/downloads/protected_data/iChip_Data/hg19_gwas_ic_t1d_o)
- 711 [nengut\\_meta\\_4\\_19\\_1.tab.gz](#)

## 712 Acknowledgements

713 We thank all study participants, and all research staff at the numerous study sites that  
714 made this research possible. Computations were performed on the Genetic Cluster Computer  
715 (GCC) hosted by SURFsara ([www.surfsara.nl](http://www.surfsara.nl)). We thank ImmunoBase for curating genetic risk  
716 factors for the immune diseases investigated. We thank the Canadian-US PBC Consortium, the  
717 Italian PBC Genetics Study Group and the UK-PBC Consortium for sharing their summary data  
718 for the PBC GWAS. We thank the International Inflammatory Bowel Disease Genetics  
719 Consortium (IIBDGC) for providing publicly available genome-wide summary statistics for CRO,  
720 UC, and IBD. We also thank the International Multiple Sclerosis Genetics Consortium (IMSGC)  
721 and the investigators leading the GWASs for CEL, JIA, RA, SLE, and T1D for providing  
722 genome-wide summary statistics from their studies on ImmunoBase.

723 This research was supported in part by a number of funding sources. This research uses  
724 resources provided by the Genetic Association Information Network (GAIN), obtained from the  
725 database of Genotypes and Phenotypes (dbGaP) found at <http://www.ncbi.nlm.nih.gov/gap>  
726 through dbGaP accession number phs000021.v3.p2; samples and associated phenotype data  
727 for this study were provided by the Molecular Genetics of Schizophrenia Collaboration (PI:  
728 Pablo V. Gejman, Evanston Northwestern Healthcare (ENH) and Northwestern University,  
729 Evanston, IL, USA). JG Pouget is supported by Fulbright Canada, the Weston Foundation, and  
730 Brain Canada through the Canada Brain Research Fund - a public-private partnership  
731 established by the Government of Canada. B Han is supported by the National Research  
732 Foundation of Korea (NRF) (grant 2016R1C1B2013126) and the Bio & Medical Technology  
733 Development Program of the NRF (grant 2017M3A9B6061852) funded by the Korean  
734 government, Ministry of Science and ICT (MSIT). HM Ollila is supported by the Finnish Cultural  
735 Foundation and Academy of Finland (grant 309643). J Martin is supported by grants SAF2015-  
736 66761-P from the Spanish Ministry of Economy and Competitiveness and P12-BIO-1395 from

737 from Consejería de Innovación, Ciencia y Tecnología, Junta de Andalucía (Spain). Y Jin, SA  
738 Santorico, and R Spritz are supported by the U.S. National Institutes of Health (NIH) grants  
739 R01AR045584, R01AR056292, X01HG007484, and P30AR057212 and by institutional  
740 research funding IUT20-46 from the Estonian Ministry of Education and Research. MD Mayes is  
741 supported by the U.S. NIH grants N01AR02251 and R01AR05528. S Raychaudhuri is  
742 supported by the U.S. NIH grants 1R01AR063759, 1R01AR062886, 1UH2AR067677-01, and  
743 U19AI111224-01 and Doris Duke Charitable Foundation grant 2013097. J Knight is the Joanne  
744 Murphy Professor in Behavioural Science. Funding for the GAIN schizophrenia sample was  
745 provided by the U.S. NIH grants R01 MH67257, R01 MH59588, R01 MH59571, R01 MH59565,  
746 R01 MH59587, R01 MH60870, R01 MH59566, R01 MH59586, R01 MH61675, R01 MH60879,  
747 R01 MH81800, U01 MH46276, U01 MH46289 U01 MH46318, U01 MH79469, and U01  
748 MH79470 and the genotyping of samples was provided through GAIN. The funding sources did  
749 not influence the study design, data analysis, or writing of this manuscript.

## 750 References

- 751 1. Schizophrenia Working Group of the Psychiatric Genomics Consortium. Biological insights  
752 from 108 schizophrenia-associated genetic loci. *Nature*. 2014;511(7510):421-7.
- 753 2. Chan MK, Krebs MO, Cox D, Guest PC, Yolken RH, Rahmoune H, et al. Development of a  
754 blood-based molecular biomarker test for identification of schizophrenia before disease  
755 onset. *Transl Psychiatry*. 2015;5:e601.
- 756 3. Benros ME, Nielsen PR, Nordentoft M, Eaton WW, Dalton SO, Mortensen PB.  
757 Autoimmune diseases and severe infections as risk factors for schizophrenia: a 30-year  
758 population-based register study. *Am J Psychiatry*. 2011;168(12):1303-10.
- 759 4. Chen SJ, Chao YL, Chen CY, Chang CM, Wu EC, Wu CS, et al. Prevalence of  
760 autoimmune diseases in in-patients with schizophrenia: nationwide population-based  
761 study. *Br J Psychiatry*. 2012;200(5):374-80.
- 762 5. Benros ME, Pedersen MG, Rasmussen H, Eaton WW, Nordentoft M, Mortensen PB. A  
763 nationwide study on the risk of autoimmune diseases in individuals with a personal or a  
764 family history of schizophrenia and related psychosis. *Am J Psychiatry*. 2014;171(2):218-  
765 26.
- 766 6. Eaton WW, Byrne M, Ewald H, Mors O, Chen CY, Agerbo E, et al. Association of  
767 schizophrenia and autoimmune diseases: linkage of Danish national registers. *Am J*  
768 *Psychiatry*. 2006;163(3):521-8.
- 769 7. Eaton WW, Pedersen MG, Nielsen PR, Mortensen PB. Autoimmune diseases, bipolar  
770 disorder, and non-affective psychosis. *Bipolar Disord*. 2010;12(6):638-46.
- 771 8. Euesden J, Breen G, Farmer A, McGuffin P, Lewis CM. The relationship between  
772 schizophrenia and rheumatoid arthritis revisited: genetic and epidemiological analyses.  
773 *Am J Med Genet B Neuropsychiatr Genet*. 2015;168B(2):81-8.
- 774 9. Sekar A, Bialas AR, de Rivera H, Davis A, Hammond TR, Kamitaki N, et al. Schizophrenia  
775 risk from complex variation of complement component 4. *Nature*. 2016;530(7589):177-83.
- 776 10. Yih Chen J, Ling Wu Y, Yin Mok M, Jan Wu YJ, Lintner KE, Wang CM, et al. Effects of  
777 complement C4 gene copy number variations, size dichotomy, and C4A deficiency on  
778 genetic risk and clinical presentation of systemic lupus erythematosus in East Asian  
779 populations. *Arthritis Rheumatol*. 2016;68(6):1442-53.
- 780 11. Pouget JG, Goncalves VF, Spain SL, Finucane HK, Raychaudhuri S, Kennedy JL, et al.  
781 Genome-wide association studies suggest limited immune gene enrichment in  
782 schizophrenia compared to 5 autoimmune diseases. *Schizophr Bull*. 2016;42(5):1176-84.
- 783 12. Cross-Disorder Group of the Psychiatric Genomics Consortium. Identification of risk loci  
784 with shared effects on five major psychiatric disorders: a genome-wide analysis. *Lancet*.  
785 2013;381:1371-9.
- 786 13. Cross-Disorder Group of the Psychiatric Genomics Consortium. Genetic relationship  
787 between five psychiatric disorders estimated from genome-wide SNPs. *Nat Genet*.  
788 2013;45(9):984-94.
- 789 14. Voight BF, Peloso GM, Orho-Melander M, Frikke-Schmidt R, Barbalic M, Jensen MK, et al.  
790 Plasma HDL cholesterol and risk of myocardial infarction: a mendelian randomisation  
791 study. *Lancet*. 2012;380(9841):572-80.
- 792 15. Do R, Willer CJ, Schmidt EM, Sengupta S, Gao C, Peloso GM, et al. Common variants  
793 associated with plasma triglycerides and risk for coronary artery disease. *Nat Genet*.  
794 2013;45(11):1345-52.
- 795 16. Bulik-Sullivan B, Finucane HK, Anttila V, Gusev A, Day FR, Loh PR, et al. An atlas of  
796 genetic correlations across human diseases and traits. *Nat Genet*. 2015;47(11):1236-41.

- 797 17. Ellinghaus D, Jostins L, Spain SL, Cortes A, Bethune J, Han B, et al. Analysis of five  
798 chronic inflammatory diseases identifies 27 new associations and highlights disease-  
799 specific patterns at shared loci. *Nat Genet.* 2016;48(5):510-8.
- 800 18. Brainstorm Consortium, Anttila V, Bulik-Sullivan B, Finucane HK, Walters RK, Bras J, et al.  
801 Analysis of shared heritability in common disorders of the brain. *Science.* 2018;360(6395)
- 802 19. Chesmore K, Bartlett J, Williams SM. The ubiquity of pleiotropy in human disease. *Hum*  
803 *Genet.* 2018;137(1):39-44.
- 804 20. Verbanck M, Chen CY, Neale B, Do R. Detection of widespread horizontal pleiotropy in  
805 causal relationships inferred from Mendelian randomization between complex traits and  
806 diseases. *Nat Genet.* 2018;50(5):693-8.
- 807 21. Jordan DM, Verbanck M, Do R. The landscape of pervasive horizontal pleiotropy in human  
808 genetic variation is driven by extreme polygenicity of human traits and diseases. *bioRxiv.*  
809 2018;doi: <https://doi.org/10.1101/416545>
- 810 22. Gandal MJ, Haney JR, Parikshak NN, Leppa V, Ramaswami G, Hartl C, et al. Shared  
811 molecular neuropathology across major psychiatric disorders parallels polygenic overlap.  
812 *Science.* 2018;359(6376):693-7.
- 813 23. Stringer S, Kahn RS, de Witte LD, Ophoff RA, Derks EM. Genetic liability for  
814 schizophrenia predicts risk of immune disorders. *Schizophr Res.* 2014;159:347-52.
- 815 24. Wang Q, Yang C, Gelernter J, Zhao H. Pervasive pleiotropy between psychiatric disorders  
816 and immune disorders revealed by integrative analysis of multiple GWAS. *Hum Genet.*  
817 2015;134(11-12):1195-209.
- 818 25. Tylee DS, Sun J, Hess JL, Tahir MA, Sharma E, Malik R, et al. Genetic correlations  
819 among psychiatric and immune-related phenotypes based on genome-wide association  
820 data. *Am J Med Genet B Neuropsychiatr Genet.* 2018;177(7):641-57.
- 821 26. Duncan LE, Shen H, Ballon JS, Hardy KV, Noordsy DL, Levinson DF. Genetic correlation  
822 profile of schizophrenia mirrors epidemiological results and suggests link between  
823 polygenic and rare variant (22q11.2) cases of schizophrenia. *Schizophr Bull.*  
824 2018;44(6):1350-61.
- 825 27. Pickrell JK, Berisa T, Liu JZ, Segurel L, Tung JY, Hinds DA. Detection and interpretation of  
826 shared genetic influences on 42 human traits. *Nat Genet.* 2016;48(7):709-17.
- 827 28. Andreassen OA, Harbo HF, Wang Y, Thompson WK, Schork AJ, Mattingsdal M, et al.  
828 Genetic pleiotropy between multiple sclerosis and schizophrenia but not bipolar disorder:  
829 differential involvement of immune-related gene loci. *Mol Psychiatry.* 2015;20:207-14.
- 830 29. Yin X, Wineinger NE, Wang K, Yue W, Norgren N, Wang L, et al. Common susceptibility  
831 variants are shared between schizophrenia and psoriasis in the Han Chinese population. *J*  
832 *Psychiatry Neurosci.* 2016;41(6):413-21.
- 833 30. Purcell SM, Wray NR, Stone JL, Visscher PM, O'Donovan MC, Sullivan PF, et al.  
834 Common polygenic variation contributes to risk of schizophrenia and bipolar disorder.  
835 *Nature.* 2009;460(7256):748-52.
- 836 31. Lee SH, Byrne EM, Hultman CM, Kahler A, Vinkhuyzen AA, Ripke S, et al. New data and  
837 an old puzzle: the negative association between schizophrenia and rheumatoid arthritis.  
838 *Int J Epidemiol.* 2015;44(5):1706-21.
- 839 32. Wray NR, Goddard ME, Visscher PM. Prediction of individual genetic risk to disease from  
840 genome-wide association studies. *Genome Res.* 2007;17(10):1520-8.
- 841 33. Fernando MM, Stevens CR, Walsh EC, De Jager PL, Goyette P, Plenge RM, et al.  
842 Defining the role of the MHC in autoimmunity: a review and pooled analysis. *PLoS Genet.*  
843 2008;4:e1000024.
- 844 34. Franke A, McGovern DP, Barrett JC, Wang K, Radford-Smith GL, Ahmad T, et al.  
845 Genome-wide meta-analysis increases to 71 the number of confirmed Crohn's disease  
846 susceptibility loci. *Nat Genet.* 2010;42(12):1118-25.

- 847 35. Jostins L, Ripke S, Weersma RK, Duerr RH, McGovern DP, Hui KY, et al. Host-microbe  
848 interactions have shaped the genetic architecture of inflammatory bowel disease. *Nature*.  
849 2012;491(7422):119-24.
- 850 36. Beecham AH, Patsopoulos NA, Xifara DK, Davis MF, Kempainen A, Cotsapas C, et al.  
851 Analysis of immune-related loci identifies 48 new susceptibility variants for multiple  
852 sclerosis. *Nat Genet*. 2013;45(11):1353-60.
- 853 37. Dubois PC, Trynka G, Franke L, Hunt KA, Romanos J, Curtotti A, et al. Multiple common  
854 variants for celiac disease influencing immune gene expression. *Nat Genet*.  
855 2010;42(4):295-302.
- 856 38. Yang J, Ferreira T, Morris AP, Medland SE, Genetic IOANTGIANTC, DIAbetes GRAM-  
857 aDIAGRAMC, et al. Conditional and joint multiple-SNP analysis of GWAS summary  
858 statistics identifies additional variants influencing complex traits. *Nat Genet*.  
859 2012;44(4):369-75, S1.
- 860 39. Zhu Z, Zhang F, Hu H, Bakshi A, Robinson MR, Powell JE, et al. Integration of summary  
861 data from GWAS and eQTL studies predicts complex trait gene targets. *Nat Genet*.  
862 2016;48(5):481-7.
- 863 40. Wu Y, Zeng J, Zhang F, Zhu Z, Qi T, Zheng Z, et al. Integrative analysis of omics  
864 summary data reveals putative mechanisms underlying complex traits. *Nat Commun*.  
865 2018;9(1):918.
- 866 41. 1000 Genomes Project Consortium, Auton A, Brooks LD, Durbin RM, Garrison EP, Kang  
867 HM, et al. A global reference for human genetic variation. *Nature*. 2015;526(7571):68-74.
- 868 42. Stahl EA, Wegmann D, Trynka G, Gutierrez-Achury J, Do R, Voight BF, et al. Bayesian  
869 inference analyses of the polygenic architecture of rheumatoid arthritis. *Nat Genet*.  
870 2012;44(5):483-9.
- 871 43. Wood AR, Esko T, Yang J, Vedantam S, Pers TH, Gustafsson S, et al. Defining the role of  
872 common variation in the genomic and biological architecture of adult human height. *Nat*  
873 *Genet*. 2014;46(11):1173-86.
- 874 44. Lee SH, Goddard ME, Wray NR, Visscher PM. A better coefficient of determination for  
875 genetic profile analysis. *Genet Epidemiol*. 2012;36(3):214-24.
- 876 45. Finucane HK, Bulik-Sullivan B, Gusev A, Trynka G, Reshef Y, Loh PR, et al. Partitioning  
877 heritability by functional annotation using genome-wide association summary statistics.  
878 *Nat Genet*. 2015;47(11):1228-35.
- 879 46. Fairweather D, Frisanchio-Kiss S, Rose NR. Sex differences in autoimmune disease from  
880 a pathological perspective. *Am J Pathol*. 2008;173(3):600-9.
- 881 47. Jones PA. Functions of DNA methylation: islands, start sites, gene bodies and beyond.  
882 *Nat Rev Genet*. 2012;13(7):484-92.
- 883 48. Bell AC, Felsenfeld G. Methylation of a CTCF-dependent boundary controls imprinted  
884 expression of the *Igf2* gene. *Nature*. 2000;405(6785):482-5.
- 885 49. Eden S, Constancia M, Hashimshony T, Dean W, Goldstein B, Johnson AC, et al. An  
886 upstream repressor element plays a role in *Igf2* imprinting. *EMBO J*. 2001;20(13):3518-25.
- 887 50. Davis S, Gale NW, Aldrich TH, Maisonpierre PC, Lhotak V, Pawson T, et al. Ligands for  
888 EPH-related receptor tyrosine kinases that require membrane attachment or clustering for  
889 activity. *Science*. 1994;266(5186):816-9.
- 890 51. Hruska M, Dalva MB. Ephrin regulation of synapse formation, function and plasticity. *Mol*  
891 *Cell Neurosci*. 2012;50(1):35-44.
- 892 52. Dustin ML. Signaling at neuro/immune synapses. *J Clin Invest*. 2012;122(4):1149-55.
- 893 53. Basu R, Huse M. Mechanical communication at the immunological synapse. *Trends Cell*  
894 *Biol*. 2017;27(4):241-54.
- 895 54. Sharfe N, Freywald A, Toro A, Dadi H, Roifman C. Ephrin stimulation modulates T cell  
896 chemotaxis. *Eur J Immunol*. 2002;32(12):3745-55.



- 897 55. Lu Q, Sun EE, Klein RS, Flanagan JG. Ephrin-B reverse signaling is mediated by a novel  
898 PDZ-RGS protein and selectively inhibits G protein-coupled chemoattraction. *Cell*.  
899 2001;105(1):69-79.
- 900 56. U.S. Food and Drug Administration, Centre for Drug Evaluation and Research. Sprycel  
901 (dasatinib) NDA 21986/22072 approval letter, 2006 June 28. Retrieved 2018 November 4,  
902 from  
903 [https://www.accessdata.fda.gov/drugsatfda\\_docs/nda/2006/021986s000\\_Sprycel\\_\\_APPR](https://www.accessdata.fda.gov/drugsatfda_docs/nda/2006/021986s000_Sprycel__APPR)  
904 [OV.pdf](https://www.accessdata.fda.gov/drugsatfda_docs/nda/2006/021986s000_Sprycel__APPR).
- 905 57. ClinicalTrials.gov [Internet]. Bethesda (MD): National Library of Medicine (US). 2016  
906 March 23. Identifier: NCT02717156, Combination therapy with Pembrolizumab and  
907 sEphB4-HSA in previously treated urothelial carcinoma. Available from:  
908 <https://clinicaltrials.gov/ct2/show/NCT02717156>.
- 909 58. ClinicalTrials.gov [Internet]. Bethesda (MD): National Library of Medicine (US). 2016 June  
910 15. Identifier NCT02799485, EphB4-HSA in treating patients with Kaposi sarcoma.  
911 Available from: <https://clinicaltrials.gov/ct2/show/NCT02799485>.
- 912 59. ClinicalTrials.gov [Internet]. Bethesda (MD): National Library of Medicine (US). 2017 May  
913 10. Identifier NCT03146871, Recombinant EphB4-HSA fusion protein and Azacitidine or  
914 Decitabine in treating patients with relapsed or refractory myelodysplastic syndrome,  
915 chronic myelomonocytic leukemia, or acute myeloid leukemia previously treated with a  
916 hypomethylating agent. Available from: <https://clinicaltrials.gov/ct2/show/NCT03146871>.
- 917 60. ClinicalTrials.gov [Internet] C. Bethesda (MD): National Library of Medicine (US). 2017  
918 February 10. Identifier: NCT03049618, Recombinant EphB4-HSA fusion protein and  
919 Pembrolizumab in treating patients with locally advanced or metastatic non-small cell lung  
920 cancer or locally recurrent or metastatic head and neck squamous cell cancer. Available  
921 from: <https://clinicaltrials.gov/ct2/show/NCT03049618>.
- 922 61. Canellas F, Lin L, Julia MR, Clemente A, Vives-Bauza C, Ollila HM, et al. Dual cases of  
923 type 1 narcolepsy with schizophrenia and other psychotic disorders. *J Clin Sleep Med*.  
924 2014;10(9):1011-8.
- 925 62. Arad M, Weiner I. Disruption of latent inhibition induced by ovariectomy can be reversed  
926 by estradiol and clozapine as well as by co-administration of haloperidol with estradiol but  
927 not by haloperidol alone. *Psychopharmacology (Berl)*. 2009;206(4):731-40.
- 928 63. Zhu ML, Bakhru P, Conley B, Nelson JS, Free M, Martin A, et al. Sex bias in CNS  
929 autoimmune disease mediated by androgen control of autoimmune regulator. *Nat*  
930 *Commun*. 2016;7:11350.
- 931 64. Markle JG, Frank DN, Mortin-Toth S, Robertson CE, Feazel LM, Rolle-Kampczyk U, et al.  
932 Sex differences in the gut microbiome drive hormone-dependent regulation of  
933 autoimmunity. *Science*. 2013;339(6123):1084-8.
- 934 65. Zammit S, Rasmussen F, Farahmand B, Gunnell D, Lewis G, Tynelius P, et al. Height and  
935 body mass index in young adulthood and risk of schizophrenia: a longitudinal study of 1  
936 347 520 Swedish men. *Acta Psychiatr Scand*. 2007;116(5):378-85.
- 937 66. Takayanagi Y, Petersen L, Laursen TM, Cascella NG, Sawa A, Mortensen PB, et al. Risk  
938 of schizophrenia spectrum and affective disorders associated with small for gestational  
939 age birth and height in adulthood. *Schizophr Res*. 2014;160(1-3):230-2.
- 940 67. Boyle EA, Li YI, Pritchard JK. An expanded view of complex traits: from polygenic to  
941 omnigenic. *Cell*. 2017;169(7):1177-86.
- 942 68. Trynka G, Hunt KA, Bockett NA, Romanos J, Mistry V, Szperl A, et al. Dense genotyping  
943 identifies and localizes multiple common and rare variant association signals in celiac  
944 disease. *Nat Genet*. 2011;43(12):1193-201.
- 945 69. Liu JZ, van Sommeren S, Huang H, Ng SC, Alberts R, Takahashi A, et al. Association  
946 analyses identify 38 susceptibility loci for inflammatory bowel disease and highlight shared  
947 genetic risk across populations. *Nat Genet*. 2015;47(9):979-86.



- 948 70. Hinks A, Cobb J, Marion MC, Prahalad S, Sudman M, Bowes J, et al. Dense genotyping of  
949 immune-related disease regions identifies 14 new susceptibility loci for juvenile idiopathic  
950 arthritis. *Nat Genet.* 2013;45(6):664-9.
- 951 71. Faraco J, Lin L, Kornum BR, Kenny EE, Trynka G, Einen M, et al. ImmunoChip study  
952 implicates antigen presentation to T cells in narcolepsy. *PLoS Genet.* 2013;9(2):e1003270.
- 953 72. Stahl EA, Raychaudhuri S, Remmers EF, Xie G, Eyre S, Thomson BP, et al. Genome-  
954 wide association study meta-analysis identifies seven new rheumatoid arthritis risk loci.  
955 *Nat Genet.* 2010;42(6):508-14.
- 956 73. Bentham J, Morris DL, Cunninghame Graham DS, Pinder CL, Tomblinson P, Behrens TW,  
957 et al. Genetic association analyses implicate aberrant regulation of innate and adaptive  
958 immunity genes in the pathogenesis of systemic lupus erythematosus. *Nat Genet.*  
959 2015;47(12):1457-64.
- 960 74. Onengut-Gumuscu S, Chen WM, Burren O, Cooper NJ, Quinlan AR, Mychaleckyj JC, et  
961 al. Fine mapping of type 1 diabetes susceptibility loci and evidence for colocalization of  
962 causal variants with lymphoid gene enhancers. *Nat Genet.* 2015;47(4):381-6.
- 963 75. Cordell HJ, Han Y, Mells GF, Li Y, Hirschfield GM, Greene CS, et al. International  
964 genome-wide meta-analysis identifies new primary biliary cirrhosis risk loci and targetable  
965 pathogenic pathways. *Nat Commun.* 2015;6:8019.
- 966 76. Strange A, Capon F, Spencer CC, Knight J, Weale ME, Allen MH, et al. A genome-wide  
967 association study identifies new psoriasis susceptibility loci and an interaction between  
968 HLA-C and ERAP1. *Nat Genet.* 2010;42(11):985-90.
- 969 77. Radstake TR, Gorlova O, Rueda B, Martin JE, Alizadeh BZ, Palomino-Morales R, et al.  
970 Genome-wide association study of systemic sclerosis identifies CD247 as a new  
971 susceptibility locus. *Nat Genet.* 2010;42(5):426-9.
- 972 78. Jin Y, Andersen G, Yorgov D, Ferrara TM, Ben S, Brownson KM, et al. Genome-wide  
973 association studies of autoimmune vitiligo identify 23 new risk loci and highlight key  
974 pathways and regulatory variants. *Nat Genet.* 2016;48(11):1418-24.
- 975 79. Yang J, Lee SH, Goddard ME, Visscher PM. GCTA: a tool for genome-wide complex trait  
976 analysis. *Am J Hum Genet.* 2011;88(1):76-82.
- 977 80. Powell JE, Henders AK, McRae AF, Caracella A, Smith S, Wright MJ, et al. The Brisbane  
978 Systems Genetics Study: genetical genomics meets complex trait genetics. *PLoS One.*  
979 2012;7(4):e35430.
- 980 81. Chen BH, Marioni RE, Colicino E, Peters MJ, Ward-Caviness CK, Tsai PC, et al. DNA  
981 methylation-based measures of biological age: meta-analysis predicting time to death.  
982 *Aging (Albany NY).* 2016;8(9):1844-65.
- 983 82. Lloyd-Jones LR, Holloway A, McRae A, Yang J, Small K, Zhao J, et al. The genetic  
984 architecture of gene expression in peripheral blood. *Am J Hum Genet.* 2017;100(2):371.
- 985 83. R Core Team. R: A language and environment for statistical computing. R Foundation for  
986 Statistical Computing. 2012;Vienna, Austria. ISBN 3-900051-07-0, URL [http://www.R-](http://www.R-project.org/)  
987 [project.org/](http://www.R-project.org/).
- 988 84. Nakazawa M. fmsb: Functions for medical statistics book with some demographic data. R  
989 package version 051. 2014<http://CRAN.R-project.org/package=fmsb>.
- 990 85. Psychiatric GWAS Consortium Bipolar Disorder Working Group. Large-scale genome-wide  
991 association analysis of bipolar disorder identifies a new susceptibility locus near ODZ4.  
992 *Nat Genet.* 2011;43(10):977-83.
- 993 86. Bulik-Sullivan BK, Loh PR, Finucane HK, Ripke S, Yang J, Patterson N, et al. LD Score  
994 regression distinguishes confounding from polygenicity in genome-wide association  
995 studies. *Nat Genet.* 2015;47(3):291-5.
- 996 87. Abecasis GR, Auton A, Brooks LD, DePristo MA, Durbin RM, Handsaker RE, et al. An  
997 integrated map of genetic variation from 1,092 human genomes. *Nature.*  
998 2012;491(7422):56-65.

- 999 88. International HapMap 3 Consortium, Altshuler DM, Gibbs RA, Peltonen L, Altshuler DM,  
1000 Gibbs RA, et al. Integrating common and rare genetic variation in diverse human  
1001 populations. *Nature*. 2010;467(7311):52-8.
- 1002 89. Purcell S, Cherny SS, Sham PC. Genetic Power Calculator: design of linkage and  
1003 association genetic mapping studies of complex traits. *Bioinformatics*. 2003;19(1):149-50.
- 1004 90. Palla L, Dudbridge F. A fast method that uses polygenic scores to estimate the variance  
1005 explained by genome-wide marker panels and the proportion of variants affecting a trait.  
1006 *Am J Hum Genet*. 2015;97(2):250-9.
- 1007 91. Dudbridge F. Power and predictive accuracy of polygenic risk scores. *PLoS Genet*.  
1008 2013;9(3):e1003348.
- 1009 92. Betz RC, Petukhova L, Ripke S, Huang H, Menelaou A, Redler S, et al. Genome-wide  
1010 meta-analysis in alopecia areata resolves HLA associations and reveals two new  
1011 susceptibility loci. *Nat Commun*. 2015;6:5966.
- 1012 93. Cortes A, Hadler J, Pointon JP, Robinson PC, Karaderi T, Leo P, et al. Identification of  
1013 multiple risk variants for ankylosing spondylitis through high-density genotyping of  
1014 immune-related loci. *Nat Genet*. 2013;45(7):730-8.
- 1015 94. Chu X, Pan CM, Zhao SX, Liang J, Gao GQ, Zhang XM, et al. A genome-wide association  
1016 study identifies two new risk loci for Graves' disease. *Nat Genet*. 2011;43(9):897-901.
- 1017 95. Gutierrez-Achury J, Zhernakova A, Pulit SL, Trynka G, Hunt KA, Romanos J, et al. Fine  
1018 mapping in the MHC region accounts for 18% additional genetic risk for celiac disease.  
1019 *Nat Genet*. 2015;47(6):577-8.
- 1020 96. Goyette P, Boucher G, Mallon D, Ellinghaus E, Jostins L, Huang H, et al. High-density  
1021 mapping of the MHC identifies a shared role for HLA-DRB1\*01:03 in inflammatory bowel  
1022 diseases and heterozygous advantage in ulcerative colitis. *Nat Genet*. 2015;47(2):172-9.
- 1023 97. Patsopoulos NA, Barcellos LF, Hintzen RQ, Schaefer C, van Duijn CM, Noble JA, et al.  
1024 Fine-mapping the genetic association of the major histocompatibility complex in multiple  
1025 sclerosis: HLA and non-HLA effects. *PLoS Genet*. 2013;9(11):e1003926.
- 1026 98. Tafti M, Hor H, Dauvilliers Y, Lammers GJ, Overeem S, Mayer G, et al. DQB1 locus alone  
1027 explains most of the risk and protection in narcolepsy with cataplexy in Europe. *Sleep*.  
1028 2014;37(1):19-25.
- 1029 99. Liu JZ, Almarri MA, Gaffney DJ, Mells GF, Jostins L, Cordell HJ, et al. Dense fine-mapping  
1030 study identifies new susceptibility loci for primary biliary cirrhosis. *Nat Genet*.  
1031 2012;44(10):1137-41.
- 1032 100. Liu JZ, Hov JR, Folseraas T, Ellinghaus E, Rushbrook SM, Doncheva NT, et al. Dense  
1033 genotyping of immune-related disease regions identifies nine new risk loci for primary  
1034 sclerosing cholangitis. *Nat Genet*. 2013;45(6):670-5.
- 1035 101. Okada Y, Han B, Tsoi LC, Stuart PE, Ellinghaus E, Tejasvi T, et al. Fine mapping major  
1036 histocompatibility complex associations in psoriasis and its clinical subtypes. *Am J Hum  
1037 Genet*. 2014;95(2):162-72.
- 1038 102. Raychaudhuri S, Sandor C, Stahl EA, Freudenberg J, Lee HS, Jia X, et al. Five amino  
1039 acids in three HLA proteins explain most of the association between MHC and  
1040 seropositive rheumatoid arthritis. *Nat Genet*. 2012;44(3):291-6.
- 1041 103. Lessard CJ, Li H, Adrianto I, Ice JA, Rasmussen A, Grundahl KM, et al. Variants at  
1042 multiple loci implicated in both innate and adaptive immune responses are associated with  
1043 Sjogren's syndrome. *Nat Genet*. 2013;45(11):1284-92.
- 1044 104. Kim K, Bang SY, Lee HS, Okada Y, Han B, Saw WY, et al. The HLA-DRbeta1 amino acid  
1045 positions 11-13-26 explain the majority of SLE-MHC associations. *Nat Commun*.  
1046 2014;5:5902.
- 1047 105. Mayes MD, Bossini-Castillo L, Gorlova O, Martin JE, Zhou X, Chen WV, et al. ImmunoChip  
1048 analysis identifies multiple susceptibility loci for systemic sclerosis. *Am J Hum Genet*.  
1049 2014;94(1):47-61.

- 1050 106. Hu X, Deutsch AJ, Lenz TL, Onengut-Gumuscu S, Han B, Chen WM, et al. Additive and  
1051 interaction effects at three amino acid positions in HLA-DQ and HLA-DR molecules drive  
1052 type 1 diabetes risk. *Nat Genet.* 2015;47(8):898-905.  
1053

## 1054 Figure Legends

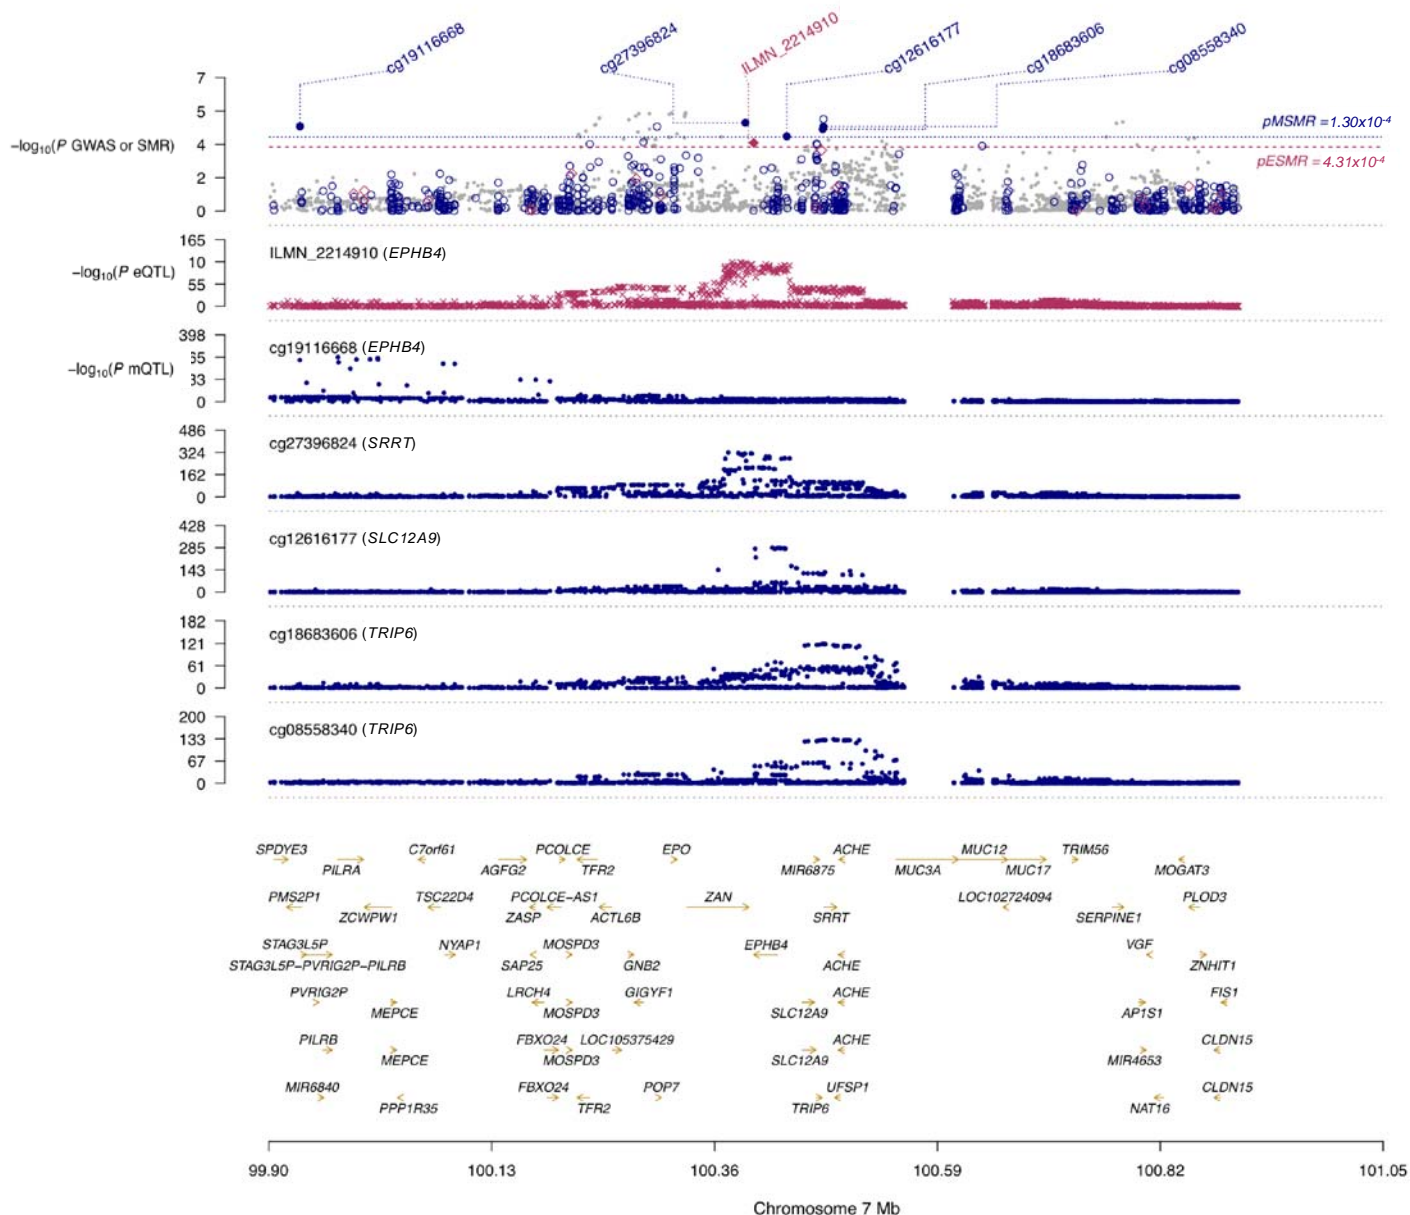

1055 **Fig 1. Prioritizing genes driving the pleiotropic association of rs1734907 in**

1056 **Crohn's disease and schizophrenia**

1057 Associations for SNP and SMR analyses across GWAS, eQTL, and mQTL datasets. Top plot

1058 gray circles illustrate SNP association ( $-\log_{10}$  p-value) with schizophrenia in the PGC-2 GWAS,

1059 while pink diamonds and blue circles indicate results of SMR tests ( $-\log_{10}$  p-value) for

1060 association of gene expression and DNAm with schizophrenia, respectively, with solid shading  
1061 indicating probes passing the HEIDI test. Middle plot illustrates SNP association ( $-\log_{10}$  p-value)  
1062 with gene expression from peripheral blood eQTL dataset. Lower plots illustrate SNP  
1063 association ( $-\log_{10}$  p-value) with gene methylation from peripheral blood mQTL dataset.

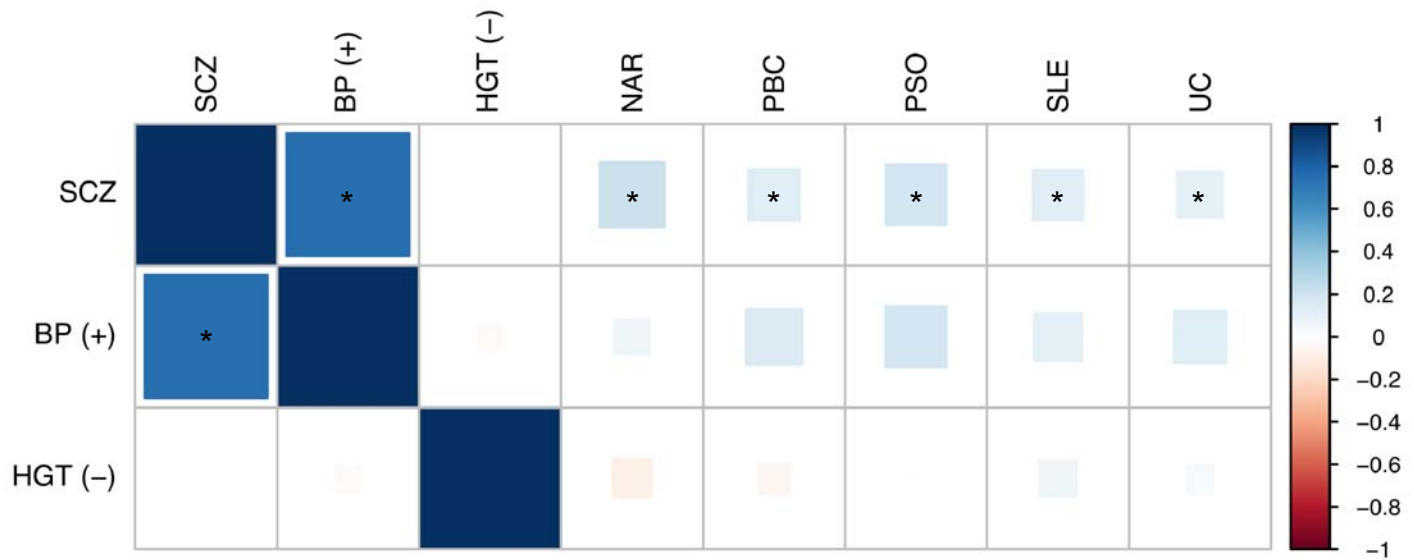

1064 **Fig 2. Genetic correlation between schizophrenia and other traits**

1065 Genetic correlation between schizophrenia, bipolar disorder, height, and 14 immune diseases

1066 was estimated using cross-trait LDSC [16]. Colour of square indicates strength of genetic

1067 correlation (red, negative correlation; blue, positive correlation). Size of square indicates

1068 statistical significance (larger, more significant  $p$ -value). Asterisks indicate genetic correlations

1069 that are statistically significant at  $p < 0.05$  threshold. BP, bipolar disorder; CEL, celiac disease;

1070 CRO, Crohn's disease; HGT, height; IBD, inflammatory bowel disease; JIA, juvenile idiopathic

1071 arthritis; MS, multiple sclerosis; NAR, narcolepsy; PBC, primary biliary cirrhosis; PSO, psoriasis,

1072 RA, rheumatoid arthritis; SLE, systemic lupus erythematosus; SSC, systemic sclerosis; T1D,

1073 type 1 diabetes; UC, ulcerative colitis; VIT, vitiligo.



1074 **Tables**

1075 **Table 1. Description of datasets analyzed**

|                                | Abr | Genome-wide significant SNPs <sup>a</sup> | Polygenic risk scoring <sup>b</sup> | Cases              | Controls           | Total number of SNPs |                              |                     |
|--------------------------------|-----|-------------------------------------------|-------------------------------------|--------------------|--------------------|----------------------|------------------------------|---------------------|
|                                |     |                                           |                                     |                    |                    | Full GWAS            | Merged with SCZ <sup>c</sup> | Pruned <sup>d</sup> |
| Schizophrenia                  | SCZ | -                                         | Target [1]                          | 35,476             | 46,839             | -                    | -                            | -                   |
| Height                         | HGT | -                                         | Negative control [43]               | 253,288            | -                  | 2,085,602            | 2,035,446                    | 124,888             |
| Alopecia areata                | AA  | 11                                        | -                                   | -                  | -                  | -                    | -                            | -                   |
| Ankylosing spondylitis         | AS  | 23                                        | -                                   | -                  | -                  | -                    | -                            | -                   |
| Autoimmune thyroid disease     | ATD | 7                                         | -                                   | -                  | -                  | -                    | -                            | -                   |
| Celiac disease                 | CEL | 38                                        | Training [68]                       | 12,041             | 12,228             | 133,352 <sup>f</sup> | 90,922                       | 19,698              |
| Crohn's disease                | CRO | 119                                       | Training [69]                       | 5,956              | 14,927             | 12,276,506           | 4,990,991                    | 114,950             |
| Inflammatory bowel disease     | IBD | 145                                       | Training [69]                       | 12,882             | 21,770             | 12,716,150           | 5,095,448                    | 116,346             |
| Juvenile idiopathic arthritis  | JIA | 22                                        | Training [70]                       | 772 <sup>e</sup>   | 8,530 <sup>e</sup> | 122,330 <sup>f</sup> | 98,477                       | 20,337              |
| Multiple sclerosis             | MS  | 103                                       | Training [36]                       | 14,498             | 24,091             | 155,756 <sup>f</sup> | 108,118                      | 21,818              |
| Narcolepsy                     | NAR | 3                                         | Training [71]                       | 1,886              | 10,421             | 109,768 <sup>f</sup> | 92,859                       | 19,866              |
| Primary biliary cirrhosis      | PBC | 19                                        | Training [75]                       | 2,764              | 10,475             | 1,038,537            | 1,041,977                    | 97,806              |
| Primary sclerosing cholangitis | PSC | 12                                        | -                                   | -                  | -                  | -                    | -                            | -                   |
| Psoriasis                      | PSO | 34                                        | Training [76]                       | 2,178              | 5,175              | 7,586,779            | 3,701,354                    | 107,002             |
| Rheumatoid arthritis           | RA  | 77                                        | Training [72]                       | 5,539              | 20,169             | 2,090,825            | 2,087,383                    | 126,049             |
| Sjögren's syndrome             | SJO | 6                                         | -                                   | -                  | -                  | -                    | -                            | -                   |
| Systemic lupus erythematosus   | SLE | 19                                        | Training [73]                       | 4,036              | 6,959              | 7,915,251            | 6,539,217                    | 264,374             |
| Systemic sclerosis             | SSC | 4                                         | Training [77]                       | 1,486 <sup>g</sup> | 3,477 <sup>g</sup> | 253,179 <sup>f</sup> | 251,441                      | 66,402              |
| Type 1 diabetes                | T1D | 56                                        | Training [74]                       | 9,340 <sup>h</sup> | 12,835             | 123,081 <sup>f</sup> | 98,418                       | 20,835              |
| Ulcerative colitis             | UC  | 96                                        | Training [69]                       | 6,968              | 20,464             | 12,255,263           | 5,167,266                    | 120,720             |
| Vitiligo                       | VIT | 16                                        | Training [78]                       | 1,381              | 14,518             | 8,790,155            | 6,223,502                    | 257,654             |

1076 <sup>a</sup>We obtained lists of genome-wide significant SNPs for each autoimmune disease from ImmunoBase, and processed them as described in  
 1077 **Supplementary Methods**; <sup>b</sup>The following columns provide details for datasets used in the polygenic risk scoring analysis. We used effect sizes



1078 obtained from the height (negative control) and autoimmune disease GWASs (training datasets) to construct polygenic risk scores in the  
1079 schizophrenia sample (target dataset). Because genome-wide summary statistics were required for this analysis, we were unable to perform  
1080 polygenic risk scoring for five autoimmune diseases for which these data were not available (AA, AS, ATD, PSC, SJO); <sup>o</sup>Prior to merging the  
1081 training dataset SNP set with the target schizophrenia dataset SNP set, the following quality control steps were performed: SNPs on non-  
1082 autosomal chromosomes (X, Y, M) were removed, SNPs with MAF<0.01 were removed if MAF was available in the training dataset, SNPs with  
1083 INFO<0.90 were removed if INFO was available in the training dataset, SNPs with missing p-value or OR were removed, symmetrical SNPs were  
1084 removed; <sup>d</sup>Pruning was performed by clumping using PLINK to retain SNPs with  $r^2 < 0.1$  within 1,000 kb windows, while filtering for the highest  
1085 significance levels within LD blocks (using options --clump-p1 1 --clump-p2 1 --clump-r2 0.1 --clump-kb 1000); <sup>e</sup>only the UK cohort from this study  
1086 was available for analysis; <sup>f</sup>this sample was genotyped using a specialty chip (ImmunoChip); <sup>g</sup>only the US cohort from this study was available for  
1087 analysis; <sup>h</sup>includes cases from 2,601 affected sibling pairs and 69 trios, which were analyzed using the Generalized Disequilibrium Test (GDT)  
1088 method and combined with case-control results by meta-analysis; Abr, abbreviation; -, not analyzed.

1089 **Table 2. Association of top HLA variants for immune diseases in schizophrenia**

| Disease          | HLA variant                               | Autoimmune                    |                   | Schizophrenia                |                   | r <sup>2</sup> with top SCZ SNP <sup>a</sup> |
|------------------|-------------------------------------------|-------------------------------|-------------------|------------------------------|-------------------|----------------------------------------------|
|                  |                                           | p                             | OR                | p                            | OR                |                                              |
| <b>AA [92]</b>   | <b>HLA-DRB1#37Asn</b>                     | <b>4.99x10<sup>-73</sup></b>  | <b>0.42</b>       | <b>4.85x10<sup>-9</sup></b>  | <b>0.91</b>       | <b>0.04</b>                                  |
| AS [93]          | HLA-B*27                                  | <1x10 <sup>-100</sup>         | 46                | 0.13                         | 1.05              | 0                                            |
| ATD [94]         | rs2281388<br>(tags HLA-DPB1*05:01)        | 1.50x10 <sup>-65</sup>        | 1.64              | 0.39                         | 1.04 <sup>b</sup> | 0                                            |
| <b>CEL [95]</b>  | <b>HLA-DQB1#74Ala</b>                     | <b>n.r.</b>                   | <b>2.14</b>       | <b>2.16x10<sup>-12</sup></b> | <b>0.89</b>       | <b>0.11</b>                                  |
| CRO [96]         | HLA-DRB1*01:03                            | 3.00x10 <sup>-62</sup>        | 2.51              | 0.61                         | 0.96              | 0                                            |
| IBD [96]         | HLA-DRB1*01:03                            | 1.93x10 <sup>-112</sup>       | 3.01              | 0.61                         | 0.96              | 0                                            |
| JIA [70]         | rs7775055                                 | 3.14x10 <sup>-174</sup>       | 6.01              | 0.12                         | 0.94              | 0                                            |
| MS [97]          | HLA-DRB1*15:01                            | 1.40x10 <sup>-234</sup>       | 2.92              | 5.10x10 <sup>-3</sup>        | 1.06              | 0                                            |
| NAR [98]         | HLA-DQB1*06:02                            | 1.04x10 <sup>-120</sup>       | 251               | 7.30x10 <sup>-3</sup>        | 1.06              | 0                                            |
| PBC [99]         | HLA-DQA1*04:01                            | 5.90x10 <sup>-45</sup>        | 3.06              | 0.20                         | 0.95              | 0                                            |
| <b>PSC [100]</b> | <b>HLA-B*08:01</b>                        | <b>3.70x10<sup>-246</sup></b> | <b>2.82</b>       | <b>5.65x10<sup>-16</sup></b> | <b>0.84</b>       | <b>0.2</b>                                   |
| PSO [101]        | HLA-C*06:02                               | 2.10x10 <sup>-201</sup>       | 3.26              | 0.55                         | 0.99              | 0                                            |
| RA [102]         | HLA-DRB1#11Val                            | <1x10 <sup>-581</sup>         | 3.80              | 2.68x10 <sup>-4</sup>        | 1.07              | 0                                            |
| <b>SJO [103]</b> | <b>HLA-DQB1*02:01</b>                     | <b>1.38x10<sup>-95</sup></b>  | <b>3.36</b>       | <b>3.84x10<sup>-15</sup></b> | <b>0.85</b>       | <b>0.11</b>                                  |
| SLE [104]        | HLA-DRB1#13Arg                            | 7.99x10 <sup>-10</sup>        | 1.55 <sup>c</sup> | 5.81x10 <sup>-4</sup>        | 1.07              | 0                                            |
| SSC [105]        | rs17500468 (TAP2)                         | 5.87x10 <sup>-62</sup>        | 2.87              | 6.76x10 <sup>-4</sup>        | 1.07              | 0                                            |
| T1D [106]        | HLA-DQB1#57Ala                            | <1x10 <sup>-1000</sup>        | 5.17              | 7.80x10 <sup>-4</sup>        | 0.95              | 0.06                                         |
| UC [96]          | rs6927022                                 | 8.00x10 <sup>-154</sup>       | 1.49              | 3.37x10 <sup>-4</sup>        | 1.06              | 0.03                                         |
| VIT [78]         | rs9271597<br>(4.7kb upstream of HLA-DQA1) | 3.15x10 <sup>-89</sup>        | 1.77              | 0.01                         | 1.04              | 0                                            |

1090 <sup>a</sup>r<sup>2</sup> with rs1233578, the top HLA variant in schizophrenia, was obtained from the GAIN schizophrenia cohort (mgs2); <sup>b</sup>Effect size estimate is for  
 1091 HLA-DPB1\*05:01; <sup>c</sup>Effect size estimate obtained from Asian sample. n.r., not reported; Disease abbreviations as defined in **Table 1**. Bold font  
 1092 indicates statistically significant association with schizophrenia.

1093 **Table 3. Immune disease risk SNPs showing pleiotropic effect in schizophrenia**

| SNP (chr:bp)                              | Immune Disease        | Risk Allele/<br>Non-Risk Allele | Immune OR (95% CI); p <sup>a</sup>             | Schizophrenia OR (95% CI); p                  | Nearby Genes                                                                                                                              | eQTL <sup>b</sup>                           | mQTL <sup>c</sup>                             | Genomic associations co-localizing to this gene <sup>d</sup> |
|-------------------------------------------|-----------------------|---------------------------------|------------------------------------------------|-----------------------------------------------|-------------------------------------------------------------------------------------------------------------------------------------------|---------------------------------------------|-----------------------------------------------|--------------------------------------------------------------|
| rs296547 <sup>e</sup><br>(chr1:200892137) | CEL [37]              | G/A                             | 1.12<br>(1.09-1.16);<br>4.11x10 <sup>-9</sup>  | 1.04<br>(1.02-1.07);<br>6.17x10 <sup>-5</sup> | <i>CAMSAP2</i><br><i>C1orf106</i><br><i>KIF21B</i><br><i>CACNA1S</i><br><i>ASCL5</i>                                                      | n.s.                                        | <i>C1orf106</i> ,<br>decreased<br>methylation | SCZ-mQTL                                                     |
| rs13126505<br>(chr4:102865304)            | CRO <sup>f</sup> [35] | A/G                             | 1.17<br>(1.10-1.25);<br>2.33x10 <sup>-10</sup> | 1.14<br>(1.10-1.19);<br>1.19x10 <sup>-8</sup> | <i>BANK1</i><br><i>SLC39A8</i><br><i>NFKB1</i>                                                                                            | <i>SLC39A8</i> ,<br>decreased<br>expression | <i>SLC39A8</i> ,<br>increased<br>methylation  | SCZ-eQTL,<br>SCZ-mQTL                                        |
| rs1734907<br>(chr7:100315517)             | CRO <sup>f</sup> [35] | A/G                             | 1.16<br>(1.11-1.21);<br>1.67x10 <sup>-13</sup> | 1.07<br>(1.04-1.10);<br>7.55x10 <sup>-6</sup> | <i>TFR2</i><br><i>ACTL6B</i><br><i>GNB2</i><br><i>GIGYF1</i><br><i>POP7</i><br><i>EPO</i><br><i>ZAN</i><br><i>EPHB4</i><br><i>SLC12A9</i> | <i>EPHB4</i> ,<br>decreased<br>expression   | <i>EPHB4</i> ,<br>increased<br>methylation    | SCZ-eQTL,<br>SCZ-mQTL,<br>eQTL-mQTL                          |

1094 <sup>a</sup>Effect sizes and p-values reported based on Immunobase curation, which reports statistics from meta-analysis of discovery and replication  
1095 datasets where available; <sup>b</sup>eQTL data was obtained from the CAGE study [82] which measured gene expression in peripheral blood. Effect on  
1096 expression (increased/decreased) corresponds to the risk allele; <sup>c</sup>mQTL data was obtained from a meta-analysis of the Brisbane Systems  
1097 Genetics Study [80] and Lothian Birth Cohorts of 1921 and 1936 [81], which measured DNA methylation in peripheral blood. Effect on expression  
1098 (increased/decreased) corresponds to the risk allele; <sup>d</sup>Significant SMR and HEIDI [39, 40] results indicating co-localization of genomic associations  
1099 with the gene of interest in schizophrenia-eQTL (SCZ-eQTL), schizophrenia-mQTL (SCZ-mQTL), and eQTL-mQTL (eQTL-mQTL) datasets; <sup>e</sup>eQTL  
1100 data were unavailable for rs296547, and rs404339 was used as a proxy SNP ( $r^2=0.85$  in 1000 Genomes Phase 3 CEU Population [41]); <sup>f</sup>Also  
1101 associated with inflammatory bowel disease; n.s., no statistically significant findings; Disease abbreviations as defined in **Table 1**.

1102 **Table 4. Estimated phenotypic and genome-wide genetic correlations between schizophrenia and other traits**

| Trait                | $h^2 \pm SE^a$ | $r_p$  | PRS        |                      |           |                        | LDSC                         |                        |
|----------------------|----------------|--------|------------|----------------------|-----------|------------------------|------------------------------|------------------------|
|                      |                |        | best $p_T$ | $\beta_{GRS} \pm SE$ | $R^2(\%)$ | p                      | $r_g \pm SE$                 | p                      |
| BPD (+) <sup>b</sup> | 0.26 ± 0.01    |        | 1          | n.a.                 | 2.1       | <10 <sup>-50</sup>     | 0.75 ± 0.05                  | 4.02x10 <sup>-57</sup> |
| HGT (-)              | 0.34 ± 0.19    |        | 1          | -0.11 ± 0.02         | 0.064     | 1.22x10 <sup>-11</sup> | 7.47x10 <sup>-5</sup> ± 0.02 | 0.99                   |
| NAR                  | 0.31 ± 0.09    | n.a.   | 1          | 0.04 ± 0.01          | 0.017     | 4.07x10 <sup>-4</sup>  | 0.213 ± 0.10                 | 0.03                   |
| PBC                  | 0.46 ± 0.08    | 0.11   | 0.3        | 0.07 ± 0.01          | 0.053     | 8.05x10 <sup>-10</sup> | 0.131 ± 0.05                 | 4.00x10 <sup>-3</sup>  |
| PSO                  | 0.27 ± 0.09    | 0.13   | 0.3        | 0.04 ± 0.01          | 0.025     | 2.26x10 <sup>-5</sup>  | 0.182 ± 0.07                 | 7.80x10 <sup>-3</sup>  |
| SLE                  | 0.15 ± 0.02    | 0.05   | 0.5        | 0.07 ± 0.01          | 0.047     | 1.50x10 <sup>-8</sup>  | 0.127 ± 0.045                | 4.60x10 <sup>-3</sup>  |
| UC                   | 0.23 ± 0.03    | -0.001 | 0.4        | 0.04 ± 0.01          | 0.018     | 3.74x10 <sup>-4</sup>  | 0.106 ± 0.04                 | 4.00x10 <sup>-3</sup>  |

1103  $R^2$  and  $h^2$  are reported on the liability scale for all diseases; <sup>a</sup> $h^2$  was estimated using LDSC; <sup>b</sup>results reported are from previously published  
 1104 analyses by the Cross-Disorder Working Group of the Psychiatric Genomics Consortium [12]; (+), positive control; (-), negative control; n.a., not  
 1105 available; SE, standard error;  $r_g$ , genetic correlation;  $r_p$ , expected phenotypic correlation based on epidemiological data (see **Materials and**  
 1106 **Methods** for details of  $r_p$  estimation).
